# Supplementary material for: Informed shared decision-making programme for patients with type 2 diabetes in primary care: cluster randomised controlled trial
Source: PubMed Central journal article supplement — BMJ Open. 2018 Dec 14;8(12):e024004. doi: 10.1136/bmjopen-2018-024004 (PMC6303685; doi:10.1136/bmjopen-2018-024004), 2018-12-14
Supplement: bmjopen-2018-024004.draft_revisions.pdf [file bmjopen-2018-024004.draft_revisions.pdf]

# BMJ Open

BMJ Open is committed to open peer review. As part of this commitment we make the peer review history of every article we publish publicly available.

When an article is published we post the peer reviewers' comments and the authors' responses online. We also post the versions of the paper that were used during peer review. These are the versions that the peer review comments apply to.

The versions of the paper that follow are the versions that were submitted during the peer review process. They are not the versions of record or the final published versions. They should not be cited or distributed as the published version of this manuscript.

BMJ Open is an open access journal and the full, final, typeset and author-corrected version of record of the manuscript is available on our site with no access controls, subscription charges or pay-per-view fees (<http://bmjopen.bmj.com>).

If you have any questions on BMJ Open's open peer review process please email [info.bmjopen@bmj.com](mailto:info.bmjopen@bmj.com)

# BMJ Open

## An informed shared decision making programme for patients with type 2 diabetes in primary care: cluster randomised controlled trial

|                               |                                                                                                                                                                                                                                                                                                                                                                                                                                                                                                                                                                                                                                                                                                                                                                                                                                                                                            |
|-------------------------------|--------------------------------------------------------------------------------------------------------------------------------------------------------------------------------------------------------------------------------------------------------------------------------------------------------------------------------------------------------------------------------------------------------------------------------------------------------------------------------------------------------------------------------------------------------------------------------------------------------------------------------------------------------------------------------------------------------------------------------------------------------------------------------------------------------------------------------------------------------------------------------------------|
| Journal:                      | <i>BMJ Open</i>                                                                                                                                                                                                                                                                                                                                                                                                                                                                                                                                                                                                                                                                                                                                                                                                                                                                            |
| Manuscript ID                 | bmjopen-2018-024004                                                                                                                                                                                                                                                                                                                                                                                                                                                                                                                                                                                                                                                                                                                                                                                                                                                                        |
| Article Type:                 | Research                                                                                                                                                                                                                                                                                                                                                                                                                                                                                                                                                                                                                                                                                                                                                                                                                                                                                   |
| Date Submitted by the Author: | 04-May-2018                                                                                                                                                                                                                                                                                                                                                                                                                                                                                                                                                                                                                                                                                                                                                                                                                                                                                |
| Complete List of Authors:     | <p>Buhse, Susanne; University of Hamburg, Faculty of Mathematics, Informatics and Natural Sciences, Health Sciences and Education</p> <p>Kuniss, Nadine; Jena University Hospital, Department of Internal Medicine III, Endocrinology and Metabolic Diseases; Diabetes Centre Thuringia</p> <p>Liethmann, Kathrin; University of Hamburg, Faculty of Mathematics, Informatics and Natural Sciences, Health Sciences and Education; University Medical Center Schleswig Holstein, Institute of Medical Psychology and Sociology</p> <p>Müller, Ulrich; Jena University Hospital, Department of Internal Medicine III, Endocrinology and Metabolic Diseases</p> <p>Lehmann, Thomas; Universitätsklinikum Jena, Institute of Medical statistics</p> <p>Mühlhauser, Ingrid; University of Hamburg, Faculty of Mathematics, Informatics and Natural Sciences, Health Sciences and Education</p> |
| Keywords:                     | PRIMARY CARE, Diabetes Mellitus, Type 2, Decision Support Techniques, Patient Education as Topic, Health Educators, Health Knowledge, Attitudes, Practice                                                                                                                                                                                                                                                                                                                                                                                                                                                                                                                                                                                                                                                                                                                                  |
|                               |                                                                                                                                                                                                                                                                                                                                                                                                                                                                                                                                                                                                                                                                                                                                                                                                                                                                                            |

SCHOLARONE™  
Manuscripts

1  
2  
3 **An informed shared decision making programme for patients with type 2 diabetes**  
4  
5 **in primary care: cluster randomised controlled trial**  
6  
7  
8

9 Susanne Buhse<sup>1</sup>, Nadine Kuniss<sup>2,3</sup>, Kathrin Liethmann<sup>1,4</sup>, Ulrich A Müller<sup>2,3</sup>, Thomas Lehmann<sup>5</sup>,  
10  
11 Ingrid Mühlhauser<sup>1</sup>  
12  
13

14  
15  
16 <sup>1</sup>Health Sciences and Education, University of Hamburg, Hamburg, Germany,  
17

18 <sup>2</sup>Department of Internal Medicine III, Endocrinology and Metabolic Diseases, Jena University  
19  
20 Hospital, Jena, Germany  
21

22 <sup>3</sup>Diabetes Centre Thuringia, Jena, Germany  
23

24 <sup>4</sup>Institute of Medical Psychology and Sociology, University Medical Center Schleswig Holstein,  
25  
26 Kiel, Germany  
27

28 <sup>5</sup>Centre for Clinical Studies, Jena University Hospital, Jena, Germany  
29  
30  
31

32  
33 Susanne Buhse, senior researcher  
34

35 Nadine Kuniss, research fellow  
36

37 Kathrin Liethmann, psychologist  
38

39 Ulrich Alfons Müller, professor of internal medicine  
40

41 Thomas Lehmann, biostatistician  
42

43 Ingrid Mühlhauser, professor of health sciences and education  
44  
45  
46

47  
48 Corresponding author: Susanne Buhse, Email: Susanne.Buhse@uni-hamburg.de  
49

50 University of Hamburg, Faculty of Mathematics, Informatics and Natural Sciences, Health  
51  
52 Sciences and Education, Martin-Luther-King-Platz 6, 20146 Hamburg  
53  
54  
55

56 Word count of main text: 4230 words  
57  
58  
59

**Keywords**

Diabetes Mellitus, Type 2; Decision Making; Decision Support Techniques; Patient Education as Topic; Health Knowledge, Attitudes, Practice; Evidence-Based Medicine; Hypertension; Family Practice; Health Educators; Physicians, Primary Care

For peer review only

## Abstract

**Objective** To translate an informed shared decision making programme (ISDM-P) for patients with type 2 diabetes from a specialized diabetes centre to the primary care setting.

**Design** Patient-blinded, two-arm multicentre, cluster RCT of 6 months follow-up; concealed randomisation of practices after patient recruitment and acquisition of baseline data.

**Setting** 22 general practices providing care according to the German Disease Management Programme (DMP) for type 2 diabetes.

**Participants** 279 of 363 eligible patients without myocardial infarction or stroke.

**Interventions** The ISDM-P comprises a patient decision aid, a corresponding group teaching session provided by medical assistants and a structured patient-physician encounter. Control group received standard DMP care.

**Primary and secondary outcome measures** Primary endpoint was patient adherence to antihypertensive or statin drug therapy by comparing prescriptions and patient-reported uptake after 6 months. Secondary endpoints included informed choice, risk knowledge (score 0 to 11 from 11 questions) and prioritised treatment goals of patients and doctors.

**Results** ISDM-P: 11 practices with 151 patients; standard care: 11 practices with 128 patients; attrition rate: 3.9%. There was no difference between groups regarding the primary endpoint. Mean drug adherence rates were high for both groups (80% for antihypertensive and 91% for statin treatment). More ISDM-P patients made informed choices regarding statin intake, 34% vs 3%, Odds Ratio [OR] 16.6 (95% CI 4.4 to 63.0), blood pressure control, 39% vs 3%, OR 22.2 (5.3 to 93.3) and HbA1c, 43% vs 3%, OR 26.0 (6.5 to 104.8). ISDM-P patients achieved higher levels of risk knowledge, with a mean score of 6.96 vs 2.86, difference 4.06 (2.96 to 5.17). In the ISDM-P group, agreement on prioritised treatment goals between patients and doctors was higher, with 88.5% vs 57%.

**Conclusions** Informed shared decision making is absent in standard care. The ISDM-P could be successfully implemented in general practices.

1  
2  
3 **Trial registration** ISRCTN77300204  
4  
5  
6  
7  
8  
9  
10  
11  
12  
13  
14  
15  
16  
17  
18  
19  
20  
21  
22  
23  
24  
25  
26  
27  
28  
29  
30  
31  
32  
33  
34  
35  
36  
37  
38  
39  
40  
41  
42  
43  
44  
45  
46  
47  
48  
49  
50  
51  
52  
53  
54  
55  
56  
57  
58  
59  
60

For peer review only

### Strengths and limitations of this study

- This cluster RCT followed the UK MRC framework for complex interventions and is the final step of the development and evaluation of an informed shared decision making programme (ISDM-P) for patients with type 2 diabetes.
- Efficacy of the ISDM-P was demonstrated in a former RCT under high fidelity conditions in a diabetes centre. In this cluster RCT, the ISDM-P was integrated into routine care by addressing implementation barriers.
- The cluster RCT was meticulously designed and conducted with a low drop-out rate; practices were only randomised after completion of patient recruitment and acquisition of baseline data.
- It was planned to keep the patients blinded, but it was impossible to keep the health care providers (practices) blinded.
- Since there is no gold standard to assess SDM in routine care, the patient-held sheet for personal treatment goals might be used as a surrogate indicator for SDM in diabetes care.

## Introduction

Diabetes guidelines explicitly recommend shared decision making (SDM) to help patients and physicians to make informed choices and to select the treatment that best fits individual patient needs, values and preferences.<sup>1 2</sup> Patients increasingly want to participate in making decisions about their health, and they have the right to be involved.<sup>3</sup> However, SDM is not yet implemented in diabetes care<sup>4</sup>, and a number of barriers have been identified that are hindering this.<sup>5</sup> While many clinicians believe that they already practice SDM, they in fact do not involve patients in treatment decision making.<sup>5 6</sup> Physicians are used to deciding what they consider best for their patients. Even if healthcare professionals are aware of such misconceptions about SDM, organisational structures (and mainly time constraints) are often perceived as barriers for patient involvement. Another challenge is the generally poor science literacy among health professionals and patients, and a lack of competencies for communicating and understanding risk information.<sup>7-9</sup> Finally, there is a paucity of evidence-based patient information material such as decision aids or drug facts boxes, which display probabilities of benefits and harms of options and are the basis for informed decision making.<sup>10 11</sup> There are only a few projects on decision aids and SDM in diabetes care; these address different treatment regimens,<sup>12</sup> statin treatment,<sup>13-15</sup> oral antidiabetic agents,<sup>16 17</sup> starting insulin injections,<sup>18</sup> or prevention of macro- and microvascular complications.<sup>19</sup> Results about efficacy or implementation are ambiguous.

We have developed an informed shared decision making programme (ISDM-P) for patients with type 2 diabetes that targets implementation barriers.<sup>20 21</sup> The ISDM-P comprises an evidence-based patient decision aid, a corresponding teaching session provided by specially trained medical assistants (MAs) and a structured patient-physician encounter. MAs and doctors are trained to provide risk information and to conduct consultations based on SDM principles. The ISDM-P is designed to be easily integrated in the structured treatment and teaching programme<sup>22-25</sup> used in the German Disease Management Programme (DMP).<sup>26</sup> We have compared the ISDM-P to a structurally equivalent control intervention in a proof-of-concept



1  
2  
3 randomised controlled trial at a single diabetes centre.<sup>21</sup> About half of the ISDM-P patients, but  
4  
5 none of the patients in the usual care group, attained adequate risk knowledge to make informed  
6  
7 decisions. Nonetheless, patients' treatment preferences were not adequately considered by  
8  
9 physicians in decision making. Although physicians expressed a positive attitude towards SDM,  
10  
11 they had not been specifically trained in SDM. Therefore, we developed additional programme  
12  
13 components to facilitate SDM-based patient-physician consultations.<sup>27</sup>  
14

15  
16 In the present study, we investigated whether the results of the pilot RCT<sup>21</sup> could be repeated in  
17  
18 terms of implementation conditions. The aim was to translate the optimised ISDM-P to the  
19  
20 primary healthcare setting.  
21  
22

## 23 24 **Methods**

### 25 26 Study design and patient involvement

27  
28 The study was a two-arm, multicentre cluster randomised controlled trial with six months  
29  
30 follow-up. According to international standards for the development and evaluation of complex  
31  
32 interventions, we additionally focused on the implementation process.<sup>28-31</sup> A detailed protocol  
33  
34 has been published.<sup>27</sup>  
35

36  
37 In order to address patient and public involvement, patients participated in the development of  
38  
39 the intervention material. After publication of the study we will write a plain language summary  
40  
41 and design a leaflet for distribution to patient groups. It will also be available on the project  
42  
43 website ([www.diabetes-und-herzinfarkt.de](http://www.diabetes-und-herzinfarkt.de)).  
44  
45

### 46 47 Context and setting

48  
49 The study took place in 21 primary care practices in East Germany (Free State of Thuringia and  
50  
51 Saxony-Anhalt) and one in the city of Hamburg. Practices were included if they provided  
52  
53 structured teaching and treatment according to the German DMP for type 2 diabetes.<sup>32,33</sup> Patient  
54  
55 education was provided by diabetes educators or MAs with special training in diabetes  
56  
57

1  
2  
3 education.<sup>34</sup> All practices gave informed consent. A more detailed description is given in the  
4  
5 protocol.<sup>27</sup>  
6  
7

## 8 9 Participants

10 Patients between 40 and 69 years who had been diagnosed with type 2 diabetes, had HbA1c  
11  
12 levels of <9% and had previously participated in structured DMP teaching sessions were  
13  
14 included. Exclusion criteria were a history of ischemic heart disease (ICD I20-I25) or stroke (ICD  
15  
16 I63), proliferative retinopathy, chronic kidney disease stage 3 or higher or care by a legal  
17  
18 guardian. All participants gave informed written consent.  
19  
20  
21  
22

## 23 24 Study recruitment

25  
26 A total of 307 general practices of the study regions were informed about the project by mail  
27  
28 (Figure). Two weeks later, the practices were called and asked whether they were interested in  
29  
30 participating in the study. Supported by the research associate, MAs and general practitioners  
31  
32 (GPs) of each practice screened the patient records for eligibility. Patients of the included  
33  
34 practices were then informed about the study by a letter and invited to participate during the next  
35  
36 consultation with their GPs. After patients who were willing to participate had given informed  
37  
38 consent, baseline data were retrieved directly from patients and supplemented by standard data  
39  
40 extracted from the electronic patient records.  
41  
42

43 Concealed external randomisation of practices (cluster) started only after conclusion of patient  
44  
45 recruitment and collection of baseline data at the study centre.  
46

47 The study was approved by the ethics committee of the Medical Association of Thuringia in April  
48  
49 2014. In December 2014, the first family practice and the first patients were enrolled. The last  
50  
51 practice was enrolled in August 2015, and the last patient, in April 2016. The overall trial end  
52  
53 date should have been July 2016, but as some practices required more time for patient  
54  
55  
56  
57  
58  
59  
60

1  
2  
3 recruitment, data collection was completed in March 2017. Please refer to data supplement: S1  
4  
5 Study procedure and registration, for in depth detail of this.  
6  
7

## 8 9 Intervention

10  
11 The ISDM-P comprises a number of interrelated components (data supplement S2).<sup>27</sup> Those  
12  
13 components that had already been tested in the proof-of-concept RCT<sup>21</sup> were: 1) an  
14  
15 evidence-based patient decision aid about the primary prevention of myocardial infarction and  
16  
17 other diabetes-related complications<sup>20</sup>; 2) a structured group teaching session provided by MAs;  
18  
19 and 3) a provider training for MAs. The additional components developed for implementation in  
20  
21 routine care were: 4) a patient-held documentation sheet with patient-defined treatment goals, to  
22  
23 be shared and discussed by the patient with the GP; and 5) a six-hour training to prepare GPs  
24  
25 for consultations in terms of SDM.<sup>27</sup>  
26  
27

28  
29 The ISDM-P addresses various facilitators and barriers of SDM implementation.<sup>5 35 36</sup> In the  
30  
31 patient-teaching session, MAs provided evidence-based risk information and assured that the  
32  
33 patients understood it by using question cards to identify knowledge gaps and to repeat content,  
34  
35 if necessary. Further, they helped patients to set individual treatment goals and to document  
36  
37 them on the patient-held sheet. The sheet ensured that individual patient set goals were  
38  
39 discussed in the subsequent patient-physician encounter. Finally, both, patients and GPs  
40  
41 documented their common goals on the patient-held sheet. A copy remained in the patient  
42  
43 record. Please refer to data supplement S3 for details on the sheet – note that this has been  
44  
45 translated from German to English.  
46  
47  
48

## 49 Comparison

50  
51 The control group received standard care supplemented with a brief extract of the patients'  
52  
53 version of the German National Disease Management Guidelines on the treatment of patients  
54  
55 with type 2 diabetes, with a link to the full version of the guideline.<sup>37</sup>  
56  
57  
58

## Outcome measures

The primary outcome measure was adherence to antihypertensive or statin therapy, operationalised as adherence to prescribed medication as documented in the patients' records at the six-month follow-up. Our hypothesis was that patients would be more adherent when they defined personal treatment goals. For more details on selection of the primary endpoint, please refer to the protocol.<sup>27</sup>

A blinded external study assistant conducted telephone interviews with all patients to assess the primary endpoint after 6 months. She was specifically trained by the psychologist who co-authored the study (KL) to perform the interview. A standardised interview guide was used. Patients were considered to have been adherent if their answers were consistent with the prescription documented in the patients' record.

Secondary endpoints included: 1) informed choices about statin treatment, blood pressure control, glucose control and smoking cessation; 2) risk knowledge; 3) realistic expectations about individual heart attack risks and effects of preventive options; 4) achievement and 5) prioritisation of treatment goals.<sup>27</sup>

The adapted multi-dimensional parameter *informed choice*<sup>38</sup> tests for adequate knowledge (e.g., correctly answering 8 out of 11 items of the validated questionnaire<sup>27</sup>) and achievement of treatment goals. A patient with adequate knowledge and who had achieved the personal treatment goal was considered as having made an informed choice. How well the treatment goals (including prioritisation of goals) of patients and GPs matched was assessed as an indicator of SDM. In addition, changes in medication prescriptions and clinical parameters, including HbA1c levels, cholesterol and blood pressure, was assessed from baseline to follow-up.

## Sample size

1  
2  
3 It was assumed that 80% of patients in the ISDM-P group would adhere to prescriptions of  
4 antihypertensive and statin medication, as compared to 60% of the control group.<sup>27</sup> An intra-  
5 cluster correlation coefficient (ICC) of 0.03, and a mean cluster size of 13 patients, were  
6 estimated. Using estimations of 1.36 for design effect (DE), 80% power, 5% significance level  
7 and a 20% drop-out rate, the calculated sample size was 306 patients distributed over 24  
8 practices (clusters).  
9  
10  
11  
12  
13  
14

### 15 16 17 18 Randomisation and blinding

19 Concealed randomisation was performed in blocks of four practices, after patient recruitment  
20 and collection of baseline data, by the Centre for Clinical Studies at the Jena University Hospital.  
21 Blinding of practices was not feasible. However, an attempt to conceal allocation for patients  
22 was made. At follow-up, patients were asked *"In your opinion, did you receive new or more-of-*  
23 *the-same information?"* Assessment of the primary endpoint, data entry and analyses were kept  
24 blinded against study allocation.  
25  
26  
27  
28  
29  
30  
31  
32  
33

### 34 35 Statistical analysis

36 Statistical analyses were carried out by intention-to-treat.<sup>27</sup> For main endpoints, missing data  
37 was imputed using the method of multiple imputations. Therefore, an extensive set was used of  
38 baseline covariates and, when appropriate, outcome specific variables, i.e., blood pressure, age,  
39 gender, graduation status and prescribed medication.  
40  
41  
42  
43  
44

45 Generalised mixed models were fitted to compare the groups with respect to rates of adherence,  
46 informed choice and individual goal achievement, with intervention as a fixed effect and  
47 practices as a random effect. Cluster-adjusted OR and 95% confidence intervals (CI) were  
48 calculated. We used linear mixed models to compare study groups regarding average  
49 differences between planned and achieved values of blood pressure and HbA1c, the level of  
50 knowledge, realistic expectations and change of clinical parameters (from baseline to 6-months  
51  
52  
53  
54  
55  
56  
57  
58  
59  
60

1  
2  
3 follow-up). Cluster-adjusted mean differences with 95% CI were calculated. No central  
4  
5 laboratory analysis was carried out for the study, as practices contract various laboratories.  
6  
7 Deviations from the protocol are described in data supplement: S1.  
8  
9

#### 10 11 Process of implementation

12  
13 Barriers and facilitators of implementation were identified using the documentation from the MAs  
14  
15 for the teaching sessions as well as interviews with MAs and GPs of each ISDM-P practice.  
16  
17 Interviews focused on workload and attitudes towards the ISDM-P as well as on experiences  
18  
19 with teaching, such as organisational aspects or use of teaching material.  
20  
21  
22  
23

#### 24 25 **Results**

26  
27 Of the 307 invited general practices, 22 were recruited; of the 363 eligible patients, 279  
28  
29 participated (with informed consent). Eleven practices (with 151 patients) were randomised to  
30  
31 ISDM-P, and 11 practices (with 128 patients), to standard care (Fig. 1). Baseline characteristics  
32  
33 were comparable between groups (Table 1). Fifteen patients of the ISDM-P group did not  
34  
35 participate in the teaching session and eight were lost to follow-up. In the control group, three  
36  
37 patients were lost to follow-up. About half of the patients in both groups thought they received  
38  
39 the usual information. More patients in the ISDM-P group responded that they received new  
40  
41 information (38% compared to 19%).  
42  
43  
44

#### 45 46 Primary outcome

47  
48 At follow-up, 218 patients were prescribed antihypertensive drugs and 107 patients, statins.  
49  
50 Adherence rates to antihypertensive and statin medications were high for both groups, with no  
51  
52 difference between groups (Table 2). Missing data did not affect the results.  
53  
54  
55

#### 56 57 Secondary outcomes

1  
2  
3 More ISDM-P patients made informed choices regarding statin intake, blood pressure control  
4 and glucose control (Table 3). A total of 136 ISDM-P patients (90%) and 109 control group  
5 patients (85%) completed the knowledge test (score of 0 to 11). The mean score was 6.96 for  
6 ISDM-P, versus 2.86 for the control group (adjusted mean difference 4.06 [2.96 to 5.17];  
7 <0.001). The mean score for the domain realistic expectations (score of 0 to 5) was 3.09 for  
8 ISDM-P patients, versus 0.92 for standard care patients (2.18 [1.67 to 2.69]; <0.001) (data  
9 supplement S4). Significantly more ISDM-P patients had adequate risk knowledge (Table 3).  
10  
11 For estimating personal heart attack risk, 131 ISDM-P and 96 standard care patients  
12 participated. The absolute difference of the patient estimated individual risks and objective risks  
13 was greater in the control group (5.5% versus 31.1%; adjusted difference -25.6% [-30.4% to -  
14 20.8%]; <0.001). This result was confirmed after multiple imputation of missing data. Notably,  
15 most patients in the control group overestimated their personal heart attack risk (data  
16 supplement S5 and S6).

17  
18  
19  
20  
21  
22  
23  
24  
25  
26  
27  
28  
29  
30  
31  
32  
33  
34  
35  
36  
37  
38  
39  
40  
41  
42  
43  
44  
45  
46  
47  
48  
49  
50  
51  
52  
53  
54  
55  
56  
57  
58  
59  
60  
There was no difference between groups with respect to meeting treatment goals at follow-up.  
Most patients in both groups achieved their goals regarding statins (85.8% of ISDM-P patients  
versus 87% of control group patients), blood pressure (93.7% versus 90%), and HbA1c (94.7%  
versus 89.1%) (data supplement S7). No substantial changes within groups from baseline to  
follow-up were observed for HbA1c levels, systolic blood pressure values, total cholesterol  
levels, LDL cholesterol levels or medication prescriptions (data not shown).

Prioritisation of treatment goals differed significantly between groups. More ISDM-P patients  
prioritised blood pressure control rather than HbA1c targets (28% versus 12%;  $p < 0.015$ ) (data  
supplement S8).

Matching of treatment goals of GPs and patients were higher for the ISDM-P group (Table 4).  
Significant differences in favour of the ISDM-P group were found for treatment goals regarding  
blood pressure values, HbA1c-levels and the prioritised goal. These results remained  
unchanged after multiple imputation of missing data.

## Process evaluation

Characteristics of practices, such as numbers of employed MAs, GPs and patients, were comparable between groups (data supplement S9).

### *ISDM-P patient teaching module*

Overall, 35 teaching sessions were provided by ISDM-P practices. MAs conducted 2 to 6 sessions that lasted between 50 and 120 minutes. Group sizes varied from one to seven patients. MAs stated that they felt well prepared for the ISDM teaching module. Role playing and question cards related to the content of the ISDM-P were identified as facilitators for training success. Before the study, MAs were unfamiliar with risk communication. Some MAs and some patients indicated that there was too much statistics to explain/understand, while a few patients stated that there was not enough information about statistics. Overall, MAs felt that patients were appreciative for the opportunity to participate in the decision making process and to define their own treatment goals.

### *ISDM-P consultations*

Patients consulted their GPs directly after the teaching session or within one to three weeks afterwards. The consultations lasted between 5 and 20 minutes (mean 11.4 minutes). GPs stated that the patients had been well prepared for decision making by their MAs, which was “*better than expected*” and “*better than usual*”. They experienced changes in communication following the ISDM-P teaching module. One GP stated that former consultations were more “*instructive, demanding, and in some ways authoritarian*”, and found that after training, patients and professional teams “*meet on an equal footing*”.

### *Workload*

MAs described the efforts of training and practicing for the teaching module as similar as for standard DMP patient education modules. Most GPs and MAs described the overall workload as appropriate. GPs considered the intended distribution of work within the team as helpful and



1  
2  
3 reduced workload. Most practices would provide the ISDM-P in routine care if it was covered by  
4 health insurances. See supplement S9 for more details.  
5  
6  
7

## 8 9 **Discussion**

### 10 *Statement of principle findings*

11  
12 Results from our pilot single centre RCT<sup>21</sup> were confirmed in this multicentre cluster RCT. The  
13 programme could be translated from a university-based diabetes centre to everyday primary  
14 care. ISDM-P patients were more likely to make informed choices, while the standard care  
15 control group did not make informed decisions. The ISDM-P group showed increased knowledge  
16 and realistic expectations regarding their individual cardiac risk and probabilities of the benefits  
17 and harms of preventive treatment options. Treatment goals between patients and their  
18 physicians were more matched for the intervention group. The patient-held documentation sheet  
19 of personal treatment objectives supported patients and GPs in deliberating treatment goals and  
20 preferences. In fact, better informed patients appeared to trigger more rational evidence-based  
21 goal setting among physicians. Contrary to our predefined hypotheses, adherence to medication  
22 was very high overall in this study population, making further improvements undetectable.  
23  
24 Overall, we believe that the ISDM-P was successfully implemented in the general practices.  
25  
26  
27  
28  
29  
30  
31  
32  
33  
34  
35  
36  
37  
38  
39  
40

### 41 *Strengths and weaknesses of the study*

42  
43 Our study has several strengths. The intervention has been developed and evaluated according  
44 to the UK MRC framework for complex interventions.<sup>28</sup> Efficacy was demonstrated in an RCT  
45 under high fidelity conditions.<sup>21</sup> Findings of the RCT and qualitative process data were used to  
46 optimize the ISDM-P.<sup>27</sup> A recent publication has reviewed important barriers of SDM.<sup>5</sup> Our  
47 programme already addresses these barriers.  
48  
49  
50  
51  
52

53 In order to facilitate integration into everyday practice, the structure and duration of the ISDM-P  
54 teaching session were adapted to standard teaching modules of the DMP.<sup>22-25</sup> The cluster RCT  
55  
56  
57  
58  
59  
60

1  
2  
3 was meticulously designed and conducted with a low drop-out rate. Additional qualitative  
4  
5 methods were used to gain insight into implementation processes.  
6

7 The weaknesses of the study include the inability to blind the study for the healthcare team for  
8  
9 study allocation, due to the nature of the intervention. It also remains unclear to what degree  
10  
11 patients were kept blinded. Further, we could not document the extent of SDM. There is no gold  
12  
13 standard to quantify patient involvement,<sup>27 39</sup> and the use of decision aids does not accurately  
14  
15 reflect SDM.<sup>40</sup> Video-taping and available instruments, such as MAPPIN'SDM, are not applicable  
16  
17 for routine care conditions.<sup>41</sup> Thus, we had to define surrogate parameters. Risk knowledge is a  
18  
19 prerequisite of informed SDM. Both RCTs showed that patients with standard care lack the  
20  
21 necessary risk knowledge. Therefore, we used knowledge and informed choice as secondary  
22  
23 endpoints. We hypothesised that successful ISDM would enable more patients to set and  
24  
25 achieve realistic and personally defined treatment goals. However, patients were already well  
26  
27 controlled at the beginning of the study. Study participants were followed in the German DMP for  
28  
29 type 2 diabetes. All had received structured education and were closely monitored. The pilot  
30  
31 RCT indicated lower adherence rates to statin prescriptions in the standard care group. Thus,  
32  
33 we hypothesised that patients would be more adherent to medication when prescriptions were  
34  
35 based on SDM principles. However, in the present cluster RCT, adherence to antihypertensive  
36  
37 medication and statins was very high already under standard care. No changes from baseline to  
38  
39 follow-up were observed for prescription rates or clinical parameters (such as levels of HbA1c,  
40  
41 blood pressure and cholesterol). Thus, it is very likely that adherence was already high at  
42  
43 baseline. Our patient-held documentation sheet improved matching of treatment goals between  
44  
45 patients and GPs and therefore might be used as a surrogate indicator for SDM. This sheet is an  
46  
47 integral part of the intervention for supporting patient participation and, at the same time, a tool  
48  
49 for the documentation of common treatment goals.  
50  
51  
52  
53  
54  
55  
56  
57  
58  
59  
60

1  
2  
3 *Strengths and weaknesses in relation to other studies, discussing important differences in*  
4 *results*  
5

6  
7 The *Statin Choice Decision Aid* was tested regarding statin adherence in a specialised clinic,<sup>14</sup>  
8 one primary care centre,<sup>13</sup> and several primary care practices in Spain.<sup>15</sup> Improvement of  
9 adherence was only found in the specialised clinic.<sup>14</sup> The *Diabetes Medication Choice Decision*  
10 *Aid* had no impact on adherence,<sup>17</sup> while one study even reported a better outcome in the  
11 control group.<sup>16</sup> In all publications, adherence rates were very high already under standard care.  
12 This is consistent with our study.  
13

14  
15 In a recent cluster RCT from the Netherlands (OPTIMAL), an SDM intervention also aimed at  
16 enhancing patients' achievement of treatment goals.<sup>12</sup> Patients were asked to choose between  
17 an intensive treatment strategy according to the ADDITION protocol and a less intensive  
18 treatment based on guideline recommendations. The findings showed no significant difference  
19 between the groups. Almost half of the patients in the intervention group switched from less  
20 intensive to intensive treatment.<sup>12</sup> However, benefits from intensifying therapy in type 2 diabetes  
21 are questionable. In our previous RCT on the ISDM-P, more patients achieved their HbA1c level  
22 goals because they set slightly higher HbA1c targets after the teaching session.<sup>21</sup> We offered  
23 and supported patients to prioritise and set realistic treatment goals. GPs of the OPTIMAL trial  
24 found the decision aid helpful, but it remains unclear if patients understood the information.<sup>12</sup>  
25 Most of the ISDM-P consultations with the GP did not take longer than usual consultations, with  
26 a mean duration of about 11 minutes. The implementation trial of the *Statin Choice Decision Aid*  
27 in Spain reported consultation times of almost 20 minutes without significant differences  
28 between intervention and control groups.<sup>15</sup> In our study, GPs just had to perform the last steps of  
29 the SDM process, as patients had been well prepared for decision making by MAs. Hence, GPs  
30 could discuss four health topics—blood glucose, blood pressure, statin use and smoking—and  
31 related treatment options with their patients in a single encounter. The duration of the group  
32 teaching session provided by MAs was comparable to other DMP teaching sessions.  
33  
34  
35  
36  
37  
38  
39  
40  
41  
42  
43  
44  
45  
46  
47  
48  
49  
50  
51  
52  
53  
54  
55  
56  
57  
58  
59  
60

1  
2  
3 Recently, Ballard et al. (2017) assessed the routine use of the *Statin Choice Decision Aid* and  
4 the *Diabetes Medication Choice Decision Aid* in a tertiary care centre under routine care.<sup>40</sup> Half  
5 of the clinicians used the statin choice decision aid and 9% the medication choice decision aid.  
6  
7 Reasons for not using the material were lack of awareness that the tools were available, time  
8 constraints and attitudinal barriers, e.g. clinicians found the decision aids not helpful or not  
9 accurate.<sup>40</sup> Recommendations to address such barriers are workshops to improve SDM skills,  
10 development of brief evidence-based consultation tools, interventions to prepare patients in  
11 decision making and the development of measurements to be used in practice to identify  
12 knowledge gaps and preferences.<sup>5</sup> Our ISDM intervention already addresses all these aspects.  
13  
14 The ISDM-P training included a demonstration of a patient teaching session and role play in  
15 order to help teams gain more insight into differences between usual counselling and SDM-  
16 based consultations. Our training took longer than trainings in other studies, but this time  
17 duration was perceived as appropriate by participants.  
18  
19  
20  
21  
22  
23  
24  
25  
26  
27  
28  
29  
30  
31

### 32 *Meaning of the study: possible explanations and implications for clinicians and policymakers*

33  
34 In our study, we determined that patients under standard care did not have adequate risk  
35 knowledge to make informed decisions. Healthcare providers do not have access to education  
36 and patient information material which fulfil the criteria for evidence-based health information.  
37  
38 The ISDM-P remedies this: it not only provides understandable and relevant risk information to  
39 healthcare personnel and patients, it also enables a patient-physician communication on equal  
40 footing and helps patients and GPs to pursue common treatment goals as recommended in  
41 DMP guidelines. Our study shows that the ISDM-P can be integrated in everyday practice  
42 without large extra effort. It meets the criteria to be covered by health insurance companies.  
43  
44  
45  
46  
47  
48  
49  
50  
51  
52

### 53 *Unanswered questions and future research*

1  
2  
3 Further research will focus on extending the ISDM-P concept to other clinical decisions. In  
4 particular, drug facts boxes on the increasing number of oral antidiabetic agents should be made  
5 available. Structured treatment and teaching programmes need to be updated and optimised  
6 based on criteria for evidence-based patient information and SDM.<sup>22 25 42</sup> Web-based formats  
7 allowing individual training and exchange with health care professionals have to be developed.  
8

9  
10  
11 This will also allow a more personalised selection of teaching modules on diabetes or  
12 hypertension care.  
13

14  
15  
16 Current clinical practice guidelines do not provide well-structured information on benefits and  
17 harms of medication or other treatments that could readily be used within consultations with  
18 patients. Fact boxes or other decision tools should be considered in guideline development.<sup>3 43</sup>  
19

20  
21 Finally, open access trainings in evidence-based medicine, risk information and SDM for  
22 healthcare providers are required. Maintaining and updating an entire ISDM treatment and  
23 teaching programme, will require an up-to-date online platform for patients and healthcare  
24 providers.  
25

26  
27 The implementation of the ISDM-P concept would meet national and international guideline  
28 recommendations as well as the patients' ethical and legal rights on true involvement in decision  
29 making.  
30  
31

### 32 33 34 35 36 37 38 39 40 41 **Acknowledgements**

42  
43 We thank the medical assistants, physicians and participating patients of all 22 primary care  
44 practices. We also thank Susanne Kählau-Meier for her valuable support in data collection and  
45 administration as well as Veronica A. Raker for editing the manuscript.  
46  
47  
48  
49

### 50 51 **Contributors**

52  
53 The study was carried out in collaboration between all authors. SB and IM designed the study.  
54  
55 SB and KL designed and tested the provider training. SB, NK and UAM were involved in the  
56  
57

1  
2  
3 planning, coordination and management of data acquisition at the study sites (primary care  
4 practices). TL did the statistical planning and analyses of the study. SB and IM wrote the first  
5 draft of the manuscript. NK, KL and UAM contributed to the draft of the manuscript. All authors  
6 critically revised the manuscript and approved the final version. The corresponding author  
7 attests that all listed authors meet authorship criteria and that no others meeting the criteria have  
8 been omitted.  
9  
10  
11  
12  
13  
14  
15  
16  
17

### 18 **Funding**

19  
20 This study was funded by the European Foundation for the Study of Diabetes (EFSD) on behalf  
21 of the European Association for the Study of Diabetes (EASD). NK's salary has been partly  
22 financed by the non-profit association "Diabeteszentrum Thüringen e.V." [Diabetes Centre  
23 Thuringia]. The EFSD and the Diabetes Centre Thuringia had no role in the design of the study,  
24 collection, analysis, and interpretation of data, and preparation and approval of the manuscript.  
25  
26  
27  
28  
29  
30  
31

### 32 **Competing interest**

33  
34 All authors have completed the ICMJE uniform disclosure form at  
35 [www.icmje.org/coi\\_disclosure.pdf](http://www.icmje.org/coi_disclosure.pdf) and declare: SB, NK, KL, and TL report grants from the EFSD  
36 during the conduct of the study; NK reports grant from the Diabetes Centre Thuringia during the  
37 conduct of the study; UAM and IM received no support from any organisation for the submitted  
38 work; all authors had no financial relationships with any organisations that might have an interest  
39 in the submitted work in the previous three years; no other relationships or activities that could  
40 appear to have influenced the submitted work.  
41  
42  
43  
44  
45  
46  
47  
48  
49  
50

### 51 **Ethics approval**

1  
2  
3 The study protocol was approved by the ethics committee of the Medical Association of  
4 Thuringia in April 2014 (ref: 29739/2014/31). All participants gave informed consent before  
5 taking part.  
6  
7  
8  
9

### 10 11 **Data sharing**

12  
13 The corresponding author can be contacted to forward request for data sharing.  
14  
15

### 16 17 **Transparency**

18  
19 The lead author (SB) affirms that the manuscript is an honest, accurate, and transparent account  
20 of the study being reported. No important aspects of the study have been omitted. Discrepancies  
21 from the study as planned have been explained.  
22  
23  
24  
25  
26  
27

### 28 29 **Copyright**

30  
31 "The Corresponding Author has the right to grant on behalf of all authors and does grant on  
32 behalf of all authors, a worldwide licence to the Publishers and its licensees in perpetuity, in all  
33 forms, formats and media (whether known now or created in the future), to i) publish, reproduce,  
34 distribute, display and store the Contribution, ii) translate the Contribution into other languages,  
35 create adaptations, reprints, include within collections and create summaries, extracts and/or,  
36 abstracts of the Contribution, iii) create any other derivative work(s) based on the Contribution,  
37 iv) to exploit all subsidiary rights in the Contribution, v) the inclusion of electronic links from the  
38 Contribution to third party material where-ever it may be located; and, vi) licence any third party  
39 to do any or all of the above."  
40  
41  
42  
43  
44  
45  
46  
47  
48  
49  
50  
51  
52  
53  
54  
55  
56  
57  
58  
59  
60

## References

- [1] German Medical Association, National Association of Statutory Health Insurance Physicians, Association of the Scientific Medical Societies. Nationale VersorgungsLeitlinie Therapie des Typ-2-Diabetes – Langfassung 2013; Available from <http://www.leitlinien.de/nvl/diabetes/therapie>. Accessed 19 Mar 2018 [Guideline in German].
- [2] Inzucchi SE, Bergenstal RM, Buse JB et al. Management of hyperglycemia in type 2 diabetes, 2015: a patient-centered approach: update to a position statement of the American Diabetes Association and the European Association for the Study of Diabetes. *Diabetes Care* 2015;38:140-49.
- [3] Rutten GEHM, Alzaid A. Person-centred type 2 diabetes care: time for a paradigm shift. *Lancet Diabetes Endocrinol* 2017;Jun 9: doi: 10.1016/S2213-8587(17)30193-6.
- [4] Rodriguez-Gutierrez R, Gionfriddo MR, Ospina NS et al. Shared decision making in endocrinology: present and future directions. *Lancet Diabetes Endocrinol* 2016;4:706-716.
- [5] Joseph-Williams N, Lloyd A, Edwards A et al. Implementing shared decision making in the NHS: lessons from the MAGIC programme. *BMJ* 2017;357:j1744.
- [6] Agoritsas T, Heen AF, Brandt L et al. Decision aids that really promote shared decision making: the pace quickens. *BMJ* 2015;350: g7624.
- [7] Scholte op Reimer WJ, Moons P, De Geest S et al. Cardiovascular risk estimation by professionally active cardiovascular nurses: results from the Basel 2005 Nurses Cohort. *Eur J Cardiovasc Nurs* 2006;5:258-63.
- [8] Mühlhauser I, Kasper J, Meyer G. Understanding of diabetes prevention studies: questionnaire survey of professionals in diabetes care. *Diabetologia* 2006;49:1742-1746.
- [9] Gigerenzer G, Gaissmaier W, Kurz-Milcke E, Schwartz LM, Woloshin S. Helping doctors and patients to make sense of health statistics. *Psychol Sci Public Interest* 2007;8:53-96.
- [10] Montori VM, Kunneman M, Brito JP. Shared decision making and improving health care: the answer is not in. *JAMA* 2017;318: 617-8.
- [11] Stacey D, Legare F, Lewis K et al. Decision aids for people facing health treatment or screening decisions. *Cochrane Database Syst Rev* 2017;4:Cd001431.
- [12] Den Ouden H, Vos RC, Rutten GEHM. Effectiveness of shared goal setting and decision making to achieve treatment targets in type 2 diabetes patients: a cluster-randomized trial (OPTIMAL). *Health Expect* 2017;20:1172-80.
- [13] Mann DM, Ponienman D, Montori VM, Arciniega J, McGinn T. The statin choice decision aid in primary care: a randomized trial. *Patient Educ Couns* 2010;80:138-40.



- 1  
2  
3 [14] Weymiller AJ, Montori VM, Jones LA et al. Helping patients with type 2 diabetes mellitus  
4 make treatment decisions: statin choice randomized trial. *Arch Intern Med* 2007;167:1076-  
5 82.  
6  
7  
8 [15] Perestelo-Perez L, Rivero-Santana A, Boronat M et al. Effect of the statin choice encounter  
9 decision aid in Spanish patients with type 2 diabetes: a randomized trial. *Patient Educ*  
10 *Couns* 2016;99:295-9.  
11  
12 [16] Mullan RJ, Montori VM, Shah ND et al. The diabetes mellitus medication choice decision  
13 aid: a randomized trial. *Arch Intern Med* 2009;169:1560-8.  
14  
15 [17] Karagiannis T, Liakos A, Branda ME et al. Use of the diabetes medication choice decision  
16 aid in patients with type 2 diabetes in Greece: a cluster randomised trial. *BMJ Open*  
17 2016;6:e012185.  
18  
19 [18] Mathers N, Ng CJ, Campbell MJ, Colwell B, Brown I, Bradley A. Clinical effectiveness of a  
20 patient decision aid to improve decision quality and glycaemic control in people with  
21 diabetes making treatment choices: a cluster randomised controlled trial (PANDAs) in  
22 general practice. *BMJ Open* 2012;2:e001469.  
23  
24 [19] Denig P, Schuling J, Haaiker-Ruskamp F, Voorham J. Effects of a patient oriented decision  
25 aid for prioritising treatment goals in diabetes: pragmatic randomised controlled trial. *BMJ*  
26 2014;349:g5651.  
27  
28 [20] Lenz M, Kasper J, Mühlhauser I. Development of a patient decision aid for prevention of  
29 myocardial infarction in type 2 diabetes - rationale, design and pilot testing. *Psychosoc Med*  
30 2009;6:Doc05.  
31  
32 [21] Buhse S, Mühlhauser I, Heller T et al. Informed shared decision-making programme on the  
33 prevention of myocardial infarction in type 2 diabetes: a randomised controlled trial. *BMJ*  
34 *Open* 2015;5:e009116.  
35  
36 [22] Grüsser M, Bott U, Ellermann P, Kronsbein P, Jörgens V. Evaluation of a structured  
37 treatment and teaching program for non-insulin-treated type II diabetic outpatients in  
38 Germany after the nationwide introduction of reimbursement policy for physicians. *Diabetes*  
39 *Care* 1993;16:1268-75.  
40  
41 [23] Kronsbein P, Mühlhauser, Jörgens V, Scholz V, Venhaus A, Berger M. Evaluation of a  
42 structured treatment and teaching programme on non-insulin-dependent diabetes. *Lancet*  
43 1988;2:1407-11.  
44  
45 [24] Grüsser M, Hartmann P, Schlottmann N, Jörgens V. Structured treatment and teaching  
46 programme for type 2 diabetic patients on conventional insulin treatment: evaluation of  
47 reimbursement policy. *Patient Educ Couns* 1996;29:123-30.  
48  
49  
50  
51  
52  
53  
54  
55  
56  
57  
58  
59  
60

- 1  
2  
3 [25] Müller UA, Müller R, Starrach A et al. Should insulin therapy in type 2 diabetic patients be  
4 started on an out- or inpatient basis? Results of a prospective controlled trial using the same  
5 treatment and teaching programme in ambulatory care and a university hospital. *Diabetes*  
6 *Metab* 1998;24:251-55.  
7  
8  
9 [26] Busse R. Disease management programs in Germany's statutory health insurance system.  
10 *Health Aff (Millwood)* 2004;23:56-67.  
11  
12 [27] Buhse S, Mühlhauser I, Kuniss N et al. An informed shared decision making programme on  
13 the prevention of myocardial infarction for patients with type 2 diabetes in primary care:  
14 protocol of a cluster randomised, controlled trial. *BMC Fam Pract* 2015;16:43.  
15  
16 [28] Craig P, Dieppe P, Macintyre S, Michie S, Nazareth I, Petticrew M. Developing and  
17 evaluating complex interventions: the new Medical Research Council guidance. *BMJ*  
18 2008;337:a1655.  
19  
20 [29] Grant A, Treweek S, Dreischulte T, Foy R, Guthrie B. Process evaluations for cluster-  
21 randomised trials of complex interventions: a proposed framework for design and reporting.  
22 *Trials* 2013;14:15.  
23  
24 [30] Pfadenhauer LM, Gerhardus A, Mozygemba K et al. Making sense of complexity in context  
25 and implementation: the Context and Implementation of Complex Interventions (CICI)  
26 framework. *Implement Sci* 2017;12:21.  
27  
28 [31] Pinnock H, Barwick M, Carpenter CR et al. Standards for Reporting Implementation Studies  
29 (StaRI) Statement. *BMJ* 2017;356:i6795.  
30  
31 [32] Busse R, Blumel M, Knieps F, Barnighausen T. Statutory health insurance in Germany: a  
32 health system shaped by 135 years of solidarity, self-governance, and competition. *Lancet*  
33 2017;390:882-97.  
34  
35 [33] Fuchs S, Henschke C, Blumel M, Busse R. Disease management programs for type 2  
36 diabetes in Germany: a systematic literature review evaluating effectiveness. *Dtsch Arztebl*  
37 *Int* 2014;111:453-63.  
38  
39 [34] German Medical Association, National Association of Statutory Health Insurance  
40 Physicians, Association of the Scientific Medical Societies. Nationale VersorgungsLeitlinie  
41 Diabetes – Strukturierte Schulungsprogramme – Langfassung. Available from  
42 <http://www.leitlinien.de/nvl/diabetes/schulungsprogramme> 2012; Accessed 19 Mar 2018  
43 [Guideline in German].  
44  
45 [35] Joseph-Williams N, Elwyn G, Edwards A. Knowledge is not power for patients: a systematic  
46 review and thematic synthesis of patient-reported barriers and facilitators to shared decision  
47 making. *Patient Educ Couns* 2014;94:291-309.  
48  
49  
50  
51  
52  
53  
54  
55  
56  
57  
58  
59  
60

- 1  
2  
3 [36] Légaré F, Ratté S, Gravel K, Graham ID. Barriers and facilitators to implementing shared  
4 decision-making in clinical practice: update of a systematic review of health professionals'  
5 perceptions. *Patient Educ Couns* 2008;73:526-35.  
6  
7  
8 [37] German Medical Association, National Association of Statutory Health Insurance  
9 Physicians, Association of the Scientific Medical Societies. PatientenLeitlinie zur Nationalen  
10 VersorgungsLeitlinie „Therapie des Typ-2-Diabetes“ 2015; Available from  
11 <http://www.leitlinien.de/nvl/diabetes/therapie>. Accessed 19 Mar 2018 [Patient guideline in  
12 German].  
13  
14  
15 [38] Marteau TM, Dormandy E, Michie S. A measure of informed choice. *Health Expect*  
16 2001;4:99-108.  
17  
18 [39] Gärtner FR, Bomhof-Roordink H, Smith IP, Scholl I, Stiggelbout AM, Pieterse AH. The  
19 quality of instruments to assess the process of shared decision making: A systematic  
20 review. *PLoS One* 2018;13:e0191747.  
21  
22 [40] Ballard AY, Kessler M, Scheitel M, Montori VM, Chaudhry R. Exploring differences in the  
23 use of the statin choice decision aid and diabetes medication choice decision aid in primary  
24 care. *BMC Med Inform Decis Mak* 2017;17:118.  
25  
26 [41] Kasper J, Heesen C, Köpke S, Fulcher G, Geiger F. Patients' and observers' perceptions of  
27 involvement differ. Validation study on inter-relating measures for shared decision making.  
28 *PLoS One* 2011;6:e26255.  
29  
30 [42] Mühlhauser I, Sawicki PT, Didjurgeit U, Jörgens V, Trampisch HJ, Berger M. Evaluation of a  
31 structured treatment and teaching programme on hypertension in general practice. *Clin Exp*  
32 *Hypertens* 1993;15:125-42.  
33  
34 [43] Mühlhauser I, Meyer G. Evidence base in guideline generation in diabetes. *Diabetologia*  
35 2013;56:1201-9.  
36  
37  
38  
39  
40  
41  
42  
43  
44  
45  
46  
47  
48  
49  
50  
51  
52  
53  
54  
55  
56  
57  
58  
59  
60

**Tables**

For peer review only

**Table 1. Baseline characteristics of patients.**

| Characteristic                                                      | ISDM-P group (n = 151) | Control group (n = 128) |
|---------------------------------------------------------------------|------------------------|-------------------------|
| Women                                                               | 67 (44.4)              | 59 (46.1)               |
| Age, years                                                          | 59.5 (6.5)             | 58.7 (7.9)              |
| Duration of diabetes, years <sup>a</sup>                            | 8.5 (6.5)              | 7.5 (6.2)               |
| Systolic blood pressure, mmHg <sup>b</sup>                          | 140 (15.1)             | 140 (16.0)              |
| Diastolic blood pressure, mmHg <sup>b</sup>                         | 81 (8.9)               | 84 (8.5)                |
| Body mass index, kg/m <sup>2c</sup>                                 | 33.6 (5.3)             | 31.5 (6.7)              |
| HbA1c, % <sup>d</sup>                                               | 7.0 (0.7)              | 7.0 (1.0)               |
| Total cholesterol <sup>b</sup> , mmol/l                             | 5.2 (1.1)              | 5.3 (1.1)               |
| HDL cholesterol <sup>e</sup> , mmol/l                               | 1.3 (0.4)              | 1.3 (0.4)               |
| LDL cholesterol <sup>e</sup> , mmol/l                               | 3.2 (0.9)              | 3.4 (1.0)               |
| Smoker (%) <sup>f</sup>                                             | 29 (19.2)              | 18 (14.5)               |
| Diagnosis hypertension (%) <sup>b</sup>                             | 134 (88.7)             | 115 (90.6)              |
| Medication for blood pressure control (%)                           | 129 (85.4)             | 104 (81.3)              |
| Medication for glucose control                                      | 124 (82.1)             | 95 (74.2)               |
| Insulin                                                             | 36 (23.8)              | 28 (21.9)               |
| Metformin                                                           | 111 (73.5)             | 88 (68.8)               |
| Sulfonylurea                                                        | 21 (13.9)              | 10 (7.8)                |
| Other antidiabetic agents                                           | 52 (34.4)              | 40 (31.3)               |
| Statin medication                                                   | 50 (33.1)              | 41 (32.0)               |
| Participation in teaching session for hypertension <sup>g</sup> (%) | 28 (21.1)              | 11 (10.1)               |
| Graduation                                                          |                        |                         |
| None                                                                | 1 (0.7)                | 1 (0.8)                 |
| Junior high school                                                  | 29 (19.2)              | 24 (18.8)               |
| High school                                                         | 93 (61.6)              | 86 (67.2)               |
| Qualification for technical college or university                   | 28 (18.5)              | 17 (13.3)               |

Values are given as patient number (percentage) or as means (SD); ISDM-P = Informed Shared Decision Making Programme;

<sup>a</sup>ISDM-P n = 151, control group n = 125; <sup>b</sup>ISDM-P n = 151, control group n = 127; <sup>c</sup>ISDM-P n = 150,

control group n = 126; <sup>d</sup>ISDM-P n = 151, control group n = 128; <sup>e</sup>ISDM-P n = 150, control group n = 117;

<sup>f</sup>ISDM-P n = 151, control group n = 124; <sup>g</sup>Patients with diagnosis of hypertension, ISDM-P n = 133, control group n = 109

**Table 2: Primary endpoint: Adherence to antihypertensive and statin therapy**

|                        | ISDM-P group  | Control group | adjusted OR [95% CI]; P value | MI: adjusted OR [95% CI]; p value | ICC   |
|------------------------|---------------|---------------|-------------------------------|-----------------------------------|-------|
| Antihypertensive drugs | 96/118 (81.4) | 71/90 (78.9)  | 1.2 [0.5 to 2.6]; 0.696       | 1.1 [0.5 to 2.4]; 0.812           | 0.176 |
| Statins                | 51/58 (87.9)  | 43/45 (95.6)  | 0.4 [0.1 to 2.0]; 0.271       | 0.4 [0.1 to 1.4]; 0.139           | 0.000 |

Values are given as patient number (percentage); ISDM-P = Informed Shared Decision Making Programme; ICC = intracluster coefficient

For peer review only

**Table 3: Informed choice and adequate knowledge**

|                                 | <b>ISDM-P group</b> | <b>Control group</b> | <b>Adjusted OR [95% CI]; P value</b> | <b>MI: adjusted OR [95% CI]; p value</b> |
|---------------------------------|---------------------|----------------------|--------------------------------------|------------------------------------------|
| Adequate knowledge <sup>a</sup> | 61/136 (44.9)       | 3/109 (2.8)          | 29.3 [6.9 to 124.6]; <0.001          | 21.4 [6.8 to 67.4]; <0.001               |
| Informed choice: statins        | 43/128 (33.6)       | 3/105 (2.9)          | 16.6 [4.4 to 63.0]; <0.001           | 6.2 [2.4 to 16.0]; <0.001                |
| Informed choice: blood pressure | 50/129 (38.8)       | 3/109 (2.8)          | 22.2 [5.3 to 93.3]; <0.001           | 10.0 [3.3 to 30.4]; <0.001               |
| Informed choice: HbA1c          | 57/134 (42.5)       | 3/109 (2.8)          | 26.0 [6.5 to 104.8]; <0.001          | 11.5 [4.0 to 33.1]; <0.001               |
| Informed choice: smoking        | 3/23 (13.0)         | 0/16 (0)             | 5.1 [0.2 to 135.1]; 0.322            | -                                        |

Values are given as patient number (percentage); ISDM-P = Informed Shared Decision Making Programme; MI = multiple imputation (n = 279)

<sup>a</sup>at least eight out of eleven questions were correctly answered

**Table 4: Match of treatment goals between physicians and patients**

| Treatment goal              | ISDM-P group     | Control group    | Adjusted difference [95% CI]; P value | MI: adjusted difference [95% CI]; p value |
|-----------------------------|------------------|------------------|---------------------------------------|-------------------------------------------|
| Blood pressure <sup>a</sup> | 3.06 mmHg (5.21) | 6.89 mmHg (6.94) | -4.0 mmHg [-6.6 to -1.4]; 0.005       | -3.1 [-5.6 to -0.5]; 0.019                |
| HbA1c <sup>b</sup>          | 0.26% (0.33)     | 0.49% (0.49)     | -0.2 [-0.4 to -0.1]; 0.003            | -0.2 [-0.39 to -0.05]; 0.012              |
|                             |                  |                  | Adjusted OR [95% CI]; P value         | MI: adjusted OR [95% CI]; P value         |
| Statins                     | 114/127 (89.8)   | 81/104 (77.9)    | 2.4 [0.9 to 6.2]; 0.077               | 1.9 [0.7 to 4.8]; 0.181                   |
| Stop smoking                | 9/17 (52.9)      | 6/9 (66.7)       | 0.5 [0.1 to 4.0]; 0.537               | 0.6 [0.1 to 3.6]; 0.561                   |
| Prioritized goal            | 92/104 (88.5)    | 45/79 (57.0)     | 6.5 [3.0 to 14.4]; <0.001             | 2.6 [1.3 to 5.2]; 0.009                   |

Values are given as patient number (percentage) unless stated otherwise. ISDM-P = Informed Shared Decision Making Programme; HbA1c = glycated haemoglobin; MI = multiple imputation (n = 279)

<sup>a</sup>adjusted mean difference between patients' treatment goals and physicians' treatment goals; values are means (standard deviation); ISDM-P n = 127, control group n = 95

<sup>b</sup>adjusted mean difference between patients' treatment goals and physicians' treatment goals; values are means (standard deviation); ISDM-P n = 133, control group n = 95



1  
2  
3  
4  
5  
6  
7  
8  
9  
10  
11  
12  
13  
14  
15  
16  
17  
18  
19  
20  
21  
22  
23  
24  
25  
26  
27  
28  
29  
30  
31  
32  
33  
34  
35  
36  
37  
38  
39  
40  
41  
42  
43  
44  
45  
46  
47  
48  
49  
50  
51  
52  
53  
54  
55  
56  
57  
58  
59  
60

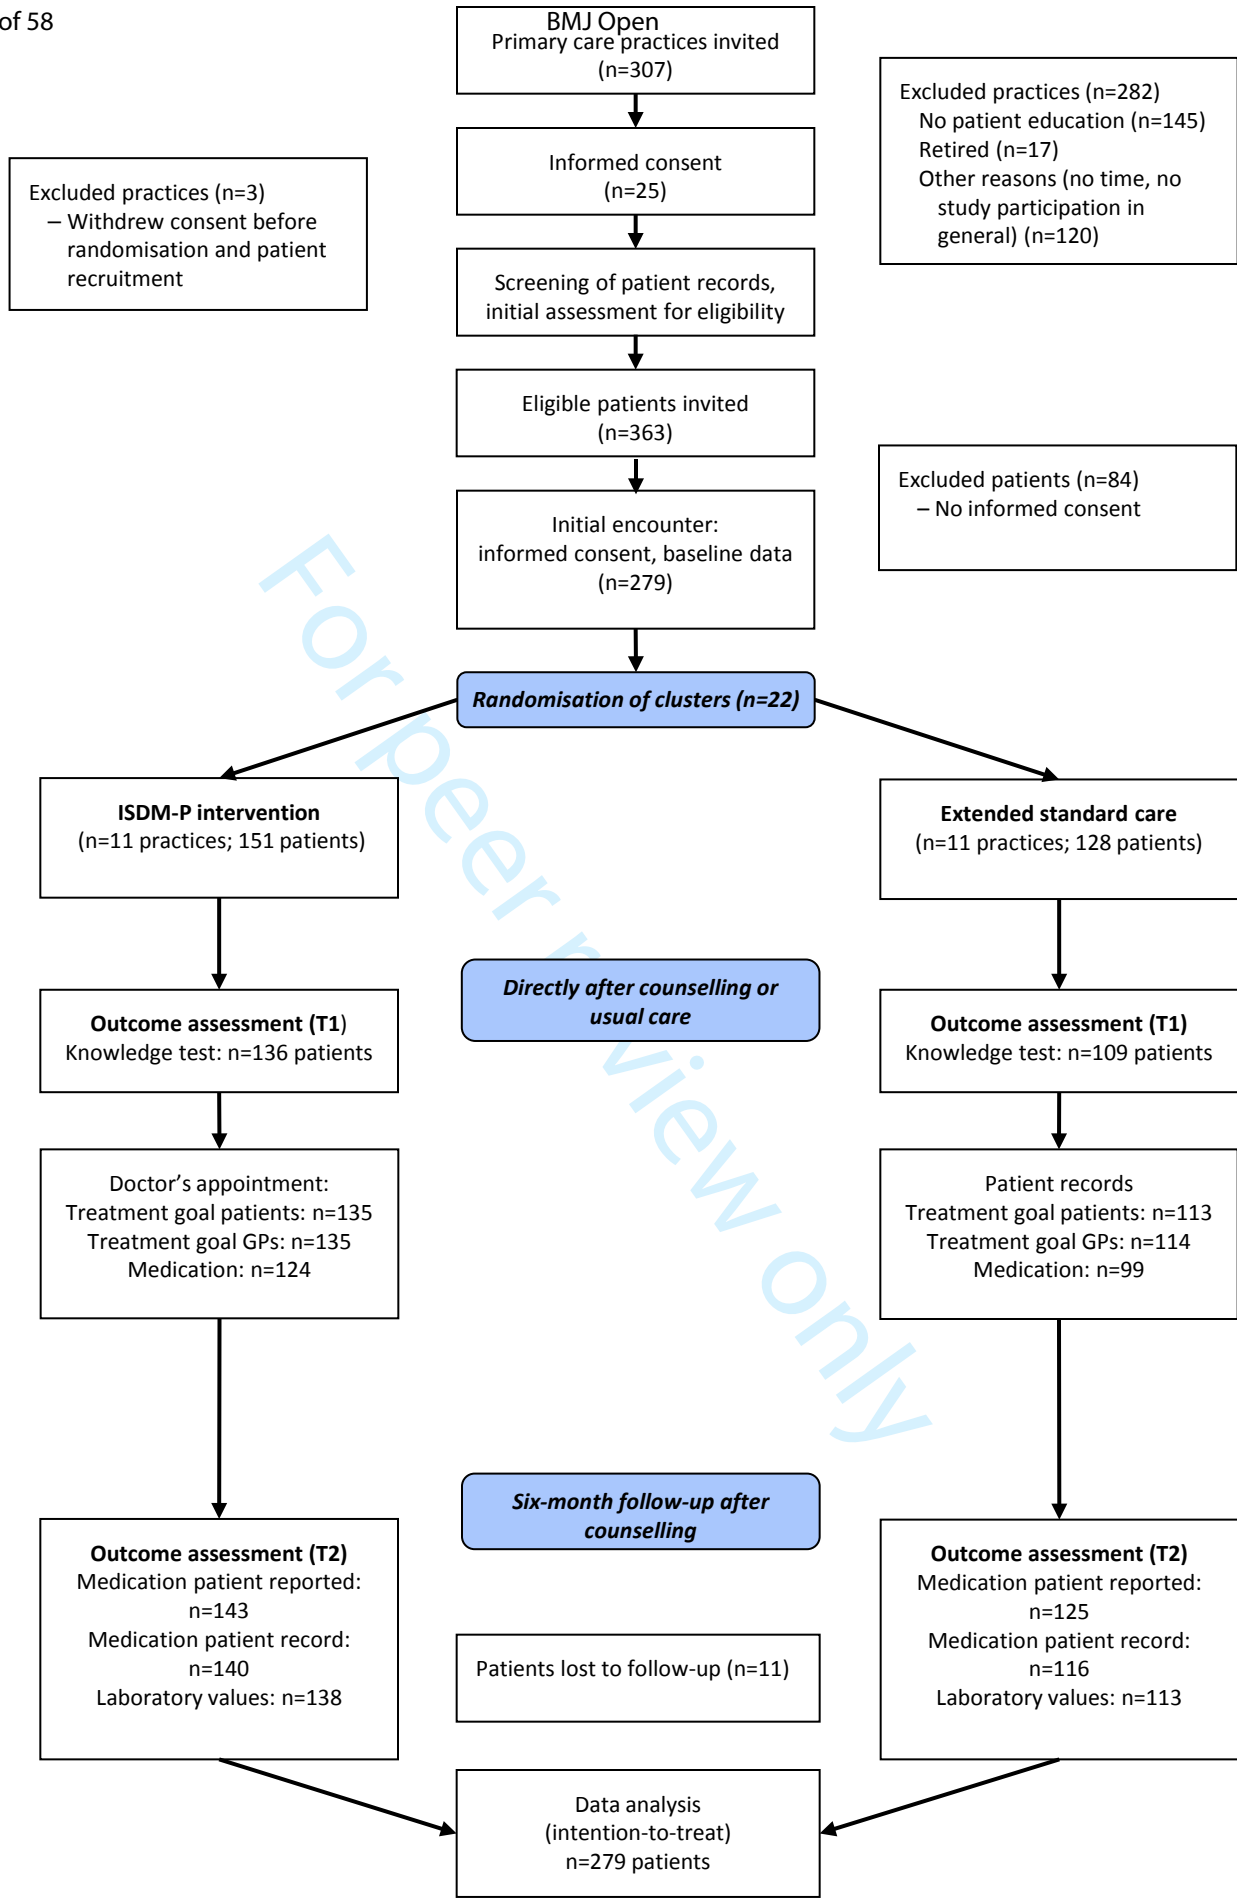

1  
2  
3 **Figure legend**  
4

5 Figure. Study flow-chart.  
6

7 ISDM-P = Informed Shared Decision Making Programme; GP = general practitioner; T1 =  
8 directly after counselling or usual care; T2 = 6-month follow-up  
9  
10  
11  
12  
13  
14  
15  
16  
17  
18  
19  
20  
21  
22  
23  
24  
25  
26  
27  
28  
29  
30  
31  
32  
33  
34  
35  
36  
37  
38  
39  
40  
41  
42  
43  
44  
45  
46  
47  
48  
49  
50  
51  
52  
53  
54  
55  
56  
57  
58  
59  
60

For peer review only

1  
2  
3  
4  
5  
6  
7  
8  
9  
10  
11  
12  
13  
14  
15  
16  
17  
18  
19  
20  
21  
22  
23  
24  
25  
26  
27  
28  
29  
30  
31  
32  
33  
34  
35  
36  
37  
38  
39  
40  
41  
42  
43  
44  
45  
46  
47  
48  
49  
50  
51  
52  
53  
54  
55  
56  
57  
58  
59  
60

**Data supplement**

For peer review only

## S1 Study procedure and registration

Practices were either allocated to the ISDM-P or to standard intervention (control). A research associate of the Jena University Hospital (NK) explained documentation forms and gave instructions to the control group. The intervention groups were trained for the ISDM-P by a research fellow (SB) and a psychologist (KL) of the University of Hamburg.

Patients received diabetes information material from their practices: an evidence-based patient decision aid for the ISDM-P group, and an extract of the German National Disease Management Guideline for the control group.

For ISDM-P patients, an appointment for the group teaching was made within 2 to 4 weeks after receiving the decision aid. Some practices provided a teaching session in the evening for patients with a full-time job or who were often away for work. When an appointment failed, a new one was made. At the end of the teaching session, patients documented their preferences on treatment goals regarding statin uptake, smoking cessation, systolic blood pressure level and HbA1c values on the documentation sheet. In addition, they were asked to document their personally most important treatment goal. Within one week after the teaching session, patients had a consultation with their GP to discuss their preferences, using the documentation sheet. As a result, the GP documented the goals they agreed on in the same documentation sheet (in a column next to the column where the patient had already documented his or her goals). In case of any deviation from the patient's goals, reasons were documented on the same sheet. Patients kept the original sheet; one copy was stored in the patient record at the practice, and another copy in the study folder.

At six months follow-up, the primary endpoint was assessed.

The study was approved by the ethics committee of the Medical Association of Thuringia in April 2014. In December 2014, the first family practice was enrolled in the study, and the first patient was enrolled in December 2014. The study was submitted to registration in February 2015 (ISRCTN77300204). The detailed study protocol was published in March 2015 [1]. In order to avoid time constraints, recruitment of practices was started earlier. This had no influence on study results, as practices were randomised after registration and publication of

1  
2  
3 the study protocol. Randomisation of the first 12 clusters was performed in June 2015.  
4  
5 Therefore, all practices and patients were randomised after study registration and well after  
6  
7 publication of the study protocol.  
8  
9

### 10 *Deviations from the protocol*

11  
12 In our study protocol, adequate knowledge was defined as a score above the median. For  
13  
14 the cluster RCT, however, the cut-off that was predefined for the proof-of-concept RCT (e.g.,  
15  
16 having at least 8 correctly answered questions, out of 11) was used. We additionally  
17  
18 calculated adequate knowledge according to the protocol. Results were consistent with the  
19  
20 cut-off used in the RCT; significantly more ISDM-P patients had adequate risk knowledge  
21  
22 than those in the control group (71% versus 8%;  $p < 0.001$ ).  
23

24 It was planned to use Fisher's exact test to compare the groups in case of binary outcomes.

25  
26 However, this univariate comparison does not account for cluster effects in the trial.

27  
28 Therefore, generalised mixed models were fitted, with intervention as a fixed effect, and  
29  
30 practices as a random effect. For the same reason, linear mixed models were used rather  
31  
32 than unpaired  $t$ -tests, which had been planned in the study protocol.  
33  
34  
35  
36  
37  
38  
39  
40  
41  
42  
43  
44  
45  
46  
47  
48  
49  
50  
51  
52  
53  
54  
55  
56  
57  
58  
59  
60

## S2 Intervention characteristics

| Components                        | ISDM-P                                                                                                                                                                                                                | Control intervention                                                                                                                              |
|-----------------------------------|-----------------------------------------------------------------------------------------------------------------------------------------------------------------------------------------------------------------------|---------------------------------------------------------------------------------------------------------------------------------------------------|
| <b>Training for the providers</b> | Participants: 4 to 6 GPs, plus the MA(s) employed in the participating practices                                                                                                                                      | Not offered                                                                                                                                       |
|                                   | Duration: approx. six hours                                                                                                                                                                                           |                                                                                                                                                   |
|                                   | Elements: curriculum for teaching sessions, concept of SDM for GPs and MAs together;<br>Didactic lectures and role playing for GPs and MAs separately                                                                 |                                                                                                                                                   |
| <b>Information for patients</b>   | Topic: DA on the prevention of myocardial infarction in type 2 diabetes [2]                                                                                                                                           | Topic: Brief extract of the German National Disease Management Guideline on the treatment of patients with type 2 diabetes, patients' version [3] |
|                                   | Date of delivery: 2 to 4 weeks before teaching session                                                                                                                                                                | Date of delivery: 2 to 4 weeks before practice visit                                                                                              |
|                                   | Core elements: Evidence-based patient information on heart attack risk, risk factors and different preventive options; combinations of 100 stick-figure pictograms and bar graphs; and user guide for risk estimation | Core elements: Recommendations related to treatment targets and a link to the full version of the guideline [3]                                   |
| <b>Patient teaching module</b>    | Participants: 4 to 6 patients per group                                                                                                                                                                               | Not offered                                                                                                                                       |
|                                   | Duration: 90 minutes                                                                                                                                                                                                  |                                                                                                                                                   |
|                                   | Core elements: DA on the prevention of myocardial infarction and diabetes related complications [2], corresponding curriculum and media, provided by trained MAs                                                      |                                                                                                                                                   |

1  
2  
3  
4  
5  
6  
7  
8  
9  
10  
11  
12  
13  
14  
15  
16  
17  
18  
19  
20  
21  
22  
23  
24  
25  
26  
27  
28  
29  
30  
31  
32  
33  
34  
35  
36  
37  
38  
39  
40  
41  
42  
43  
44  
45  
46  
47

|                             |                                                                                                                                                    |                                               |
|-----------------------------|----------------------------------------------------------------------------------------------------------------------------------------------------|-----------------------------------------------|
| <b>Consultation with GP</b> | Duration: approx. 10 minutes                                                                                                                       | Optional standard consultation with physician |
|                             | Core elements: patient-held sheet for the documentation of individual treatment goals; ISDM-P consultation guideline to structure the conversation |                                               |

Adapted from the study protocol [1]  
 ISDM-P = Informed Shared Decision Making Programme; GPs = general practitioners; MA = medical assistant; SDM = shared decision making; DA = decision aid

For peer review only

**S3 patient-held sheet for documentation of treatment goals.**

Date: \_\_\_ / \_\_\_ / \_\_\_

# My treatment goals

|                       |                                           | Please fill in after the teaching session 😊 | Treatment agreement<br>Completed by GP during encounter |
|-----------------------|-------------------------------------------|---------------------------------------------|---------------------------------------------------------|
| <b>Statins</b>        | <b>Uptake</b>                             | <input type="checkbox"/>                    | <input type="checkbox"/>                                |
|                       | <b>No statins</b>                         | <input type="checkbox"/>                    | <input type="checkbox"/>                                |
| <b>Smoking</b>        | <b>Quit smoking</b>                       | <input type="checkbox"/>                    | <input type="checkbox"/>                                |
|                       | <b>Continue smoking</b>                   | <input type="checkbox"/>                    | <input type="checkbox"/>                                |
|                       | <b>Non-smoker</b>                         | <input type="checkbox"/>                    |                                                         |
| <b>Blood glucose</b>  | <b>HbA1c-level</b> _____ %                |                                             | _____ %                                                 |
| <b>Blood pressure</b> | <b>Systolic blood pressure</b> _____ mmHg |                                             | _____ mmHg                                              |

## What option is most important to you?

(Please check one only)

|                          |                                             |                          |
|--------------------------|---------------------------------------------|--------------------------|
| <input type="checkbox"/> | • <b>Statin intake</b>                      | <input type="checkbox"/> |
| <input type="checkbox"/> | • <b>Smoking cessation</b>                  | <input type="checkbox"/> |
| <input type="checkbox"/> | • <b>Achievement of HbA1c goal</b>          | <input type="checkbox"/> |
| <input type="checkbox"/> | • <b>Achievement of blood pressure goal</b> | <input type="checkbox"/> |

Comment if goals deviate from patient's goals (completed by GP)



**S4 Risk knowledge and realistic expectations after intervention.**

| Outcome                                        | ISDM-P group (n = 136) | Control group (n = 109) | adjusted difference [95% CI]; P value | MI: adjusted difference [95% CI]; p value | ICC   |
|------------------------------------------------|------------------------|-------------------------|---------------------------------------|-------------------------------------------|-------|
| Risk knowledge (primary endpoint) (score 0–11) | 6.96 (2.55)            | 2.86 (1.87)             | 4.06 [2.96 to 5.17]; <0.001           | 3.7 [2.7 to 4.8]; <0.001                  | 0.208 |
| Realistic expectations (score 0–5)             | 3.09 (1.45)            | 0.92 (1.01)             | 2.18 [1.67 to 2.69]; <0.001           | 2.0 [1.5 to 2.5]; <0.001                  | 0.108 |

Values are given as means (standard deviation); CI = confidence interval; ICC = intracluster coefficient; ISDM-P = Informed Shared Decision Making Programme; MI = multiple imputation (n = 279)

For peer review only

**S5 Patients' estimation of individual heart attack risk after intervention**

| Heart attack risk  | ISDM-P group  | Control group | Adjusted OR [95% CI]; <i>p</i> value |
|--------------------|---------------|---------------|--------------------------------------|
| Correct estimation | 87/131 (66.4) | 13/96 (13.5)  | 12.69 [5.47 to 29.39]; <0.001        |
| Overestimation     | 26/131 (19.8) | 79/96 (82.3)  | 0.05 [0.03 to 0.11]; <0.001          |
| Underestimation    | 18/131 (13.7) | 10/96 (4.2)   | 2.79 [1.01 to 7.74]; <0.001          |

Values are given as patient number (percentage); CI = confidence interval; ISDM-P = Informed Shared Decision Making Programme; OR = odds ratio

For peer review only

1  
2  
3  
4  
5  
6  
7  
8  
9  
10  
11  
12  
13  
14  
15  
16  
17  
18  
19  
20  
21  
22  
23  
24  
25  
26  
27  
28  
29  
30  
31  
32  
33  
34  
35  
36  
37  
38  
39  
40  
41  
42  
43  
44  
45  
46  
47  
48  
49  
50  
51  
52  
53  
54  
55  
56  
57  
58  
59  
60

**S6 Calculated risk and patients' estimated risk of myocardial infarction**

|                                          | <b>ISDM-P group</b> | <b>Control group</b> |
|------------------------------------------|---------------------|----------------------|
| Calculated risk of myocardial infarction | 11.9% (4.2)         | 11.5% (4.6)          |
| Patients' estimated risk                 | 14.5% (11.8)        | 41.6% (26.2)         |

Values are given as mean (standard deviation); ISDM-P = Informed Shared Decision Making Programme

For peer review only

**S7 Achievement of treatment goals at 6 months of follow-up.**

| Outcome                     | ISDM-P            | Control intervention | Adjusted OR [95% CI]; <i>p</i> value | MI: adjusted OR [95% CI]; <i>p</i> value |
|-----------------------------|-------------------|----------------------|--------------------------------------|------------------------------------------|
| Statins                     | 109/127<br>(85.8) | 87/100<br>(87.0)     | 0.9 [0.3 to 2.7];<br>0.899           | 0.95 [0.4 to 2.5];<br>0.921              |
| Blood pressure <sup>a</sup> | 119/127<br>(93.7) | 99/110<br>(90)       | 1.6 [0.5 to 5.3];<br>0.476           | 0.8 [0.3 to 2.2];<br>0.683               |
| HbA1c <sup>a</sup>          | 126/133<br>(94.7) | 98/110<br>(89.1)     | 2.1 [0.7 to 6.6];<br>0.201           | 1.2 [0.4 to 3.6];<br>0.792               |
| Smoking                     | 8/22 (36.4)       | 4/13 (30.8)          | 1.4 [0.3 to 6.8];<br>0.688           | 1.4 [0.2 to 8.1];<br>0.736               |

Values are given as patient number (percentage); CI = confidence interval; ISDM-P = Informed Shared Decision Making Programme; HbA1c = glycated hemoglobin; MI = multiple imputation (n = 279); OR = odds ratio

<sup>a</sup>Achievement was defined as having reached a value between 80% and 120% of the defined goal

For peer review only

**S8 Patients' prioritised treatment goals**

| Prioritised goal       | ISDM-P n = 135 | Control n = 113 | Adjusted OR [95% CI]; p value |
|------------------------|----------------|-----------------|-------------------------------|
| Blood pressure control | 38 (28.1)      | 14 (12.4)       | 3.0 [1.2 to 7.3]; 0.015       |
| Glucose control        | 59 (43.7)      | 54 (47.8)       | 0.8 [0.4 to 1.7]; 0.529       |
| Statins                | 6 (4.4)        | 9 (8.0)         | 0.5 [0.1 to 2.1]; 0.336       |
| Stop smoking           | 9 (6.7)        | 4 (3.5)         | 1.5 [0.5 to 4.4]; 0.451       |
| No prioritisation      | 23 (17.0)      | 32 (28.3)       | 0.5 [0.2 to 1.3]; 0.150       |

Values are given as patient number (percentage); CI = confidence interval; ISDM-P = Informed Shared Decision Making Programme; OR = odds ratio

For peer review only

## S9 Process evaluation

The implementation success of the ISDM-P may depend on the complex interactions between components and terms and conditions of the setting. Based on the framework by Grant et al. [4], underlying processes involving clusters and patients were monitored to explore barriers and to promote factors in implementing the ISDM-P.

### 1. Processes involving clusters (primary care practices)

Baseline characteristics of clusters (practices)

|                                                                  | ISDM       | Control     |
|------------------------------------------------------------------|------------|-------------|
| <b>Primary care practices</b>                                    | n = 11     | n = 11      |
| Mean number of general practitioners (GPs) in each practice (SD) | 1.9 (0.9)  | 1.9 (1.2)   |
| Mean number of medical assistants (MAs) in each practice (SD)    | 3.4 (1.5)  | 2.9 (1.5)   |
| <b>MAs</b>                                                       | n = 12     | n = 12      |
| Mean age, years (SD)                                             | 42.1 (8.8) | 40.3 (10.8) |
| Female sex                                                       | 12         | 10          |
| Weekly working time, hours (SD)                                  | 33.2 (8.9) | 33.3 (12.0) |
| Years of professional experience, mean (SD)                      | 15.8 (9.2) | 13.8 (9.0)  |
| <b>Physicians</b>                                                | n = 12     | n = 12      |
| Mean age (SD)                                                    | 42.9 (5.9) | 50.2 (6.5)  |
| Female sex                                                       | 7          | 8           |

1  
2  
3  
4  
5  
6  
7  
8  
9  
10  
11  
12  
13  
14  
15  
16  
17  
18  
19  
20  
21  
22  
23  
24  
25  
26  
27  
28  
29  
30  
31  
32  
33  
34  
35  
36  
37  
38  
39  
40  
41  
42  
43  
44  
45  
46  
47

| <b>Recruitment of clusters</b>                  |                                                                                                                                                                                                                                                                                                                                                                                                                                                                                                                                                                                                                                                                                                                                                                                                                                                                                                                                                              |
|-------------------------------------------------|--------------------------------------------------------------------------------------------------------------------------------------------------------------------------------------------------------------------------------------------------------------------------------------------------------------------------------------------------------------------------------------------------------------------------------------------------------------------------------------------------------------------------------------------------------------------------------------------------------------------------------------------------------------------------------------------------------------------------------------------------------------------------------------------------------------------------------------------------------------------------------------------------------------------------------------------------------------|
| Recruitment of practices                        | <p><u>Facilitators:</u> Most practices that agreed to participate in our study had previously attended a special training course at the Jena University Hospital in order to provide the DMP structured treatment and teaching programme for patients with type 2 diabetes, which is covered by health insurances.</p> <p><u>Barriers:</u> Only 22 of 307 practices that were invited gave informed consent. The main reason for not participating was that healthcare teams did not offer DMP patient teaching modules, even though this has been defined as an essential part of diabetes care. Patients are usually sent to specialised diabetes practices that provide patient teaching. The ISDM-P addresses the entire practice team. As treatment goals to be negotiated and defined in the teaching sessions are further discussed in the consultation with the GP, outsourcing the teaching module might not work in this disconnected concept.</p> |
| <b>Delivery to clusters (practice teams)</b>    |                                                                                                                                                                                                                                                                                                                                                                                                                                                                                                                                                                                                                                                                                                                                                                                                                                                                                                                                                              |
| Intervention, intervention delivery as intended | <p><u>Facilitators:</u> Training for providers and the corresponding material were pre-tested and optimised with GPs and diabetes educators of the Jena University Hospital, Germany. All ISDM-P trainings (n = 6) were performed by the same research fellow (SB) and a psychologist (KL). The training sessions took place at the Jena University Hospital following a structured curriculum and protocol. All trainings were conducted according to the curriculum and protocol. Role playing was used to train ISDM skills and to ensure that the team was well prepared for the teaching session and the consultation. MAs are familiar with role playing</p>                                                                                                                                                                                                                                                                                           |

|                             |                                                                                                                                                                                                                                                                                                                                                                                                                                                                                                                                                                                                                                                                                                                                                                                                                                            |
|-----------------------------|--------------------------------------------------------------------------------------------------------------------------------------------------------------------------------------------------------------------------------------------------------------------------------------------------------------------------------------------------------------------------------------------------------------------------------------------------------------------------------------------------------------------------------------------------------------------------------------------------------------------------------------------------------------------------------------------------------------------------------------------------------------------------------------------------------------------------------------------|
|                             | <p>from former trainings for the DMP structured teaching programme. The role play took less time than expected. Therefore, duration of the training was reduced from six hours to four or five hours. A reason for that was a small group size in all trainings. Participants appreciated time saving.</p> <p><u>Barriers:</u> It was difficult to arrange a mutual training appointment for some practices because the time to recruit all patients for the study varied between the practices. Hence, three practice teams were trained individually. In two instances, two or four practice teams were trained together.</p> <p>One team (of one GP and one MA) was trained at the practice site. The GP and MA declined role playing. It was therefore impossible to check if they were adequately prepared to provide the ISDM-P.</p> |
| <b>Response of clusters</b> |                                                                                                                                                                                                                                                                                                                                                                                                                                                                                                                                                                                                                                                                                                                                                                                                                                            |
| Knowledge and comprehension | <p><u>Facilitators:</u> Role playing and question cards</p> <p>During training, problems were discussed within the groups. At the end of the training, MAs answered the question cards that were also used in the patient teaching session. Incorrect answers were corrected and explained. MAs stated that they felt well prepared for the ISDM-P teaching module.</p> <p>We did not directly assess MAs' and GPs' knowledge of the probabilities of benefits and harms of preventive options regarding diabetes-related complications after the training. However, ISDM-P patients' high level of knowledge and realistic expectations indicated that MAs had sufficient skills to provide risk</p>                                                                                                                                      |



1  
2  
3  
4  
5  
6  
7  
8  
9  
10  
11  
12  
13  
14  
15  
16  
17  
18  
19  
20  
21  
22  
23  
24  
25  
26  
27  
28  
29  
30  
31  
32  
33  
34  
35  
36  
37  
38  
39  
40  
41  
42  
43  
44  
45  
46  
47

|  |                                                                                                                                                                                                                                                                                                                                                                  |
|--|------------------------------------------------------------------------------------------------------------------------------------------------------------------------------------------------------------------------------------------------------------------------------------------------------------------------------------------------------------------|
|  | <p>information to patients in an understandable manner.</p> <p><u>Barriers:</u> The MA who declined role playing mentioned some trouble with explaining benefits of statin intake during one patient teaching session. She felt that patients were not motivated anymore to follow the teaching session. We did not directly assess MAs' and GPs' knowledge.</p> |
|--|------------------------------------------------------------------------------------------------------------------------------------------------------------------------------------------------------------------------------------------------------------------------------------------------------------------------------------------------------------------|

**2. Processes involving patients with type 2 diabetes**

| <b>Recruitment and reach in individuals</b> |                                                                                                                                                                                                                                                                                                                                                                                                                                                                                                                                                                                                                                                                                                                                  |
|---------------------------------------------|----------------------------------------------------------------------------------------------------------------------------------------------------------------------------------------------------------------------------------------------------------------------------------------------------------------------------------------------------------------------------------------------------------------------------------------------------------------------------------------------------------------------------------------------------------------------------------------------------------------------------------------------------------------------------------------------------------------------------------|
| <p>Recruitment procedure</p>                | <p><u>Facilitators:</u> A research associate explained and handed over a guide to GPs and MAs on how to recruit patients and collect baseline data. Supported by the research associate, MAs or GPs of each practice screened the patient records for eligibility. All patients who met inclusion criteria were informed about the study by a letter from their GP and were invited to participate during the next consultation.</p> <p>In order to minimize selection bias, practices were randomised to either ISDM-P or standard care only after recruitment and assessment of baseline data.</p> <p><u>Barriers:</u> 84 patients did not want to participate in the study. Reasons were too much effort and no interest.</p> |
| <b>Delivery to patients</b>                 |                                                                                                                                                                                                                                                                                                                                                                                                                                                                                                                                                                                                                                                                                                                                  |
| <p>Fidelity of the ISDM-P teaching</p>      | <p>A total of 35 teaching sessions were provided by ISDM-P practices. MAs conducted 2 to 6 sessions that</p>                                                                                                                                                                                                                                                                                                                                                                                                                                                                                                                                                                                                                     |

|                                                                                                                                                                                                                                                                                                                                                                                                                                                                                        |                                                                                                                                                                                                                                                                                                                                                                                                                                                                                                                                                                                                                                                                                                                                                                                                                                                                                                                                                                                                                                                                                                                                                                                                                                                                                                                                                                                                                                                                                                                                                                                                                                                                                  |
|----------------------------------------------------------------------------------------------------------------------------------------------------------------------------------------------------------------------------------------------------------------------------------------------------------------------------------------------------------------------------------------------------------------------------------------------------------------------------------------|----------------------------------------------------------------------------------------------------------------------------------------------------------------------------------------------------------------------------------------------------------------------------------------------------------------------------------------------------------------------------------------------------------------------------------------------------------------------------------------------------------------------------------------------------------------------------------------------------------------------------------------------------------------------------------------------------------------------------------------------------------------------------------------------------------------------------------------------------------------------------------------------------------------------------------------------------------------------------------------------------------------------------------------------------------------------------------------------------------------------------------------------------------------------------------------------------------------------------------------------------------------------------------------------------------------------------------------------------------------------------------------------------------------------------------------------------------------------------------------------------------------------------------------------------------------------------------------------------------------------------------------------------------------------------------|
| <p>1<br/>2<br/>3<br/>4<br/>5 sessions provided by MAs<br/>6<br/>7 (assessed using diary entries of<br/>8<br/>9 each teaching session and<br/>10<br/>11 interviews with MAs after all<br/>12<br/>13 teaching sessions were<br/>14<br/>15 completed)<br/>16<br/>17<br/>18<br/>19<br/>20<br/>21<br/>22<br/>23<br/>24<br/>25<br/>26<br/>27<br/>28<br/>29<br/>30<br/>31<br/>32<br/>33<br/>34<br/>35<br/>36<br/>37<br/>38<br/>39<br/>40<br/>41<br/>42<br/>43<br/>44<br/>45<br/>46<br/>47</p> | <p>lasted between 50 and 120 minutes. The group size varied from one patient to seven patients.</p> <p><u>Facilitators:</u> Teaching curriculum and documentation sheet for treatment goals</p> <p>MAs followed the teaching curriculum and used the corresponding material. They used the curriculum to prepare for the patient teaching and to structure the session. One of the materials was a magnet board with 100 orange and blue game pieces, representing people with or without myocardial infarction, to visualize patients' risks of myocardial infarction and the benefit of statin intake. It reminded participants of a game board, and a few MAs were worried that patients may feel that they were not being taken seriously by using the board. Only a few patients did not want to use the board. Overall, it was positively accepted by participants. MAs stated that the board was helpful to explain statistics, and they wish to keep using it.</p> <p>A total of 135 of 136 patients who participated in the ISDM teaching session defined individual treatment goals together with their MAs and subsequently discussed them with their physicians. The patient-held sheet to document individual treatment goals was the link between the teaching session and the consultation with the GP.</p> <p><u>Barriers:</u> A few MAs indicated that there was <i>"too much statistics"</i> to explain to patients. They were afraid to overstrain their patients. Fifteen patients did not attend the teaching session because of time constraints due to work-related issues or for other personal reasons. Not all patients had read the decision aid.</p> |
|----------------------------------------------------------------------------------------------------------------------------------------------------------------------------------------------------------------------------------------------------------------------------------------------------------------------------------------------------------------------------------------------------------------------------------------------------------------------------------------|----------------------------------------------------------------------------------------------------------------------------------------------------------------------------------------------------------------------------------------------------------------------------------------------------------------------------------------------------------------------------------------------------------------------------------------------------------------------------------------------------------------------------------------------------------------------------------------------------------------------------------------------------------------------------------------------------------------------------------------------------------------------------------------------------------------------------------------------------------------------------------------------------------------------------------------------------------------------------------------------------------------------------------------------------------------------------------------------------------------------------------------------------------------------------------------------------------------------------------------------------------------------------------------------------------------------------------------------------------------------------------------------------------------------------------------------------------------------------------------------------------------------------------------------------------------------------------------------------------------------------------------------------------------------------------|

1  
2  
3  
4  
5  
6  
7  
8  
9  
10  
11  
12  
13  
14  
15  
16  
17  
18  
19  
20  
21  
22  
23  
24  
25  
26  
27  
28  
29  
30  
31  
32  
33  
34  
35  
36  
37  
38  
39  
40  
41  
42  
43  
44  
45  
46  
47

|                                                                                                                                                                              |                                                                                                                                                                                                                                                                                                                                                                                                                                                                                                                                                                                                                                                                                                                                                                                                                                                                                                                                                                                                                                                                                                                                       |
|------------------------------------------------------------------------------------------------------------------------------------------------------------------------------|---------------------------------------------------------------------------------------------------------------------------------------------------------------------------------------------------------------------------------------------------------------------------------------------------------------------------------------------------------------------------------------------------------------------------------------------------------------------------------------------------------------------------------------------------------------------------------------------------------------------------------------------------------------------------------------------------------------------------------------------------------------------------------------------------------------------------------------------------------------------------------------------------------------------------------------------------------------------------------------------------------------------------------------------------------------------------------------------------------------------------------------|
|                                                                                                                                                                              | The teaching sessions were not video-recorded.                                                                                                                                                                                                                                                                                                                                                                                                                                                                                                                                                                                                                                                                                                                                                                                                                                                                                                                                                                                                                                                                                        |
| <p>Fidelity of the ISDM-P consultations between patients and GPs (assessed using protocol entries of GP’s consultations and interviews with GPs at the end of the study)</p> | <p>Patients consulted their GPs directly after the teaching session or within one to three weeks afterwards. A total of 95 ISDM-P consultations were protocolled (151 patients were randomised to ISDM-P). The consultations lasted between 5 and 20 minutes (mean 11.4 minutes).</p> <p><u>Facilitators:</u> Consultation guideline and documentation sheet for treatment goals</p> <p>GPs stated that they used the ISDM-P consultation guideline to structure the conversation with the patients, and they considered the guideline to be helpful and time-saving. The patient-held sheet for the documentation of individual treatment goals was used to discuss the patients’ personal treatment goals and to find a consensus. GPs said that they actively involved patients in the decision making process, and that patients knew their treatment goals. One GP said that former consultations were more “<i>instructive, demanding, and in some ways authoritarian</i>”, while patients and professional teams now “<i>meet on an equal footing</i>”.</p> <p><u>Barriers:</u> We did not video record the consultations.</p> |
| <b>Response of patients regarding the ISDM-P</b>                                                                                                                             |                                                                                                                                                                                                                                                                                                                                                                                                                                                                                                                                                                                                                                                                                                                                                                                                                                                                                                                                                                                                                                                                                                                                       |
| <p>Satisfaction with the ISDM-P, knowledge level, participation in</p>                                                                                                       | <p><u>Facilitators:</u> MAs said that patients appreciated the opportunity to participate in the decision making process and to define their own treatment goals. GPs stated that the patients were well prepared for</p>                                                                                                                                                                                                                                                                                                                                                                                                                                                                                                                                                                                                                                                                                                                                                                                                                                                                                                             |

1  
2  
3  
4  
5  
6  
7  
8  
9  
10  
11  
12  
13  
14  
15  
16  
17  
18  
19  
20  
21  
22  
23  
24  
25  
26  
27  
28  
29  
30  
31  
32  
33  
34  
35  
36  
37  
38  
39  
40  
41  
42  
43  
44  
45  
46  
47

|                        |                                                                                                                                                                                                                                                                                                                                                                                                                                                                                                                                                                                                                                                                                                                                                                                                                                                                                                                  |
|------------------------|------------------------------------------------------------------------------------------------------------------------------------------------------------------------------------------------------------------------------------------------------------------------------------------------------------------------------------------------------------------------------------------------------------------------------------------------------------------------------------------------------------------------------------------------------------------------------------------------------------------------------------------------------------------------------------------------------------------------------------------------------------------------------------------------------------------------------------------------------------------------------------------------------------------|
| <p>decision making</p> | <p>decision making by their MAs, which was “better than expected” and “better than usual”. GPs mentioned differences in communication before and after the ISDM-P teaching module. During the consultations, the patients asked more questions than usual, and these were distinct and more specific than normal; e.g., they asked for risk factors as well as for benefits and harms of treatment options. One GP said that patients were more well-informed, making the consultation much easier than before. Quantitative data showed that ISDM-P patients had better knowledge and realistic expectations regarding heart attack risk and preventive options, and that they made more informed choices. Matching of prioritised treatment goals between patients and physicians was better in the ISDM-P group.</p> <p><u>Barriers:</u> A few patients gave feedback that there was too much statistics.</p> |
|------------------------|------------------------------------------------------------------------------------------------------------------------------------------------------------------------------------------------------------------------------------------------------------------------------------------------------------------------------------------------------------------------------------------------------------------------------------------------------------------------------------------------------------------------------------------------------------------------------------------------------------------------------------------------------------------------------------------------------------------------------------------------------------------------------------------------------------------------------------------------------------------------------------------------------------------|

**3. Other**

| <p><b>Maintenance</b></p>                               |                                                                                                                                                                                                                                                                                                                                                                                             |
|---------------------------------------------------------|---------------------------------------------------------------------------------------------------------------------------------------------------------------------------------------------------------------------------------------------------------------------------------------------------------------------------------------------------------------------------------------------|
| <p>Integrating the ISDM-P in routine care, workload</p> | <p><u>Facilitators:</u> Appropriate workload</p> <p>MAs described the efforts of training and practicing for the teaching module as similar as for DMP patient education modules. The overall workload was perceived as appropriate. Most GPs described the workload as appropriate. They considered the intended distribution of work within the team as helpful and reduced workload.</p> |

1  
2  
3  
4  
5  
6  
7  
8  
9  
10  
11  
12  
13  
14  
15  
16  
17  
18  
19  
20  
21  
22  
23  
24  
25  
26  
27  
28  
29  
30  
31  
32  
33  
34  
35  
36  
37  
38  
39  
40  
41  
42  
43  
44  
45  
46  
47

|                                                                                   |                                                                                                                                                                  |
|-----------------------------------------------------------------------------------|------------------------------------------------------------------------------------------------------------------------------------------------------------------|
|                                                                                   | <p><u>Barriers:</u> Budgetary allowance</p> <p>Most GPs stated that they will provide the ISDM-P in routine care if it will be covered by health insurances.</p> |
| <p><b>Unintended consequences</b></p>                                             |                                                                                                                                                                  |
| <p>MAs: stress, anxiety, tension<br/>within the team due to<br/>overburdening</p> | <p>One MA did not like to work with the magnet board.</p> <p>No other unintended consequences were mentioned in the interviews.</p>                              |
| <p>GPs: stress, anxiety, tension<br/>within the team due to<br/>overburdening</p> | <p>No unintended consequences were mentioned in the interviews.</p>                                                                                              |

For peer review only

## References

- [1] Buhse S, Mühlhauser I, Kuniss N, Müller UA, Lehmann T, Liethmann K et al. An informed shared decision making programme on the prevention of myocardial infarction for patients with type 2 diabetes in primary care: protocol of a cluster randomised, controlled trial. *BMC Fam Pract* 2015;16:43.
- [2] Lenz M, Kasper J, Mühlhauser I. Development of a patient decision aid for prevention of myocardial infarction in type 2 diabetes - rationale, design and pilot testing. *Psychosoc Med* 2009;6:Doc05.
- [3] German Medical Association, National Association of Statutory Health Insurance Physicians, Association of the Scientific Medical Societies. PatientenLeitlinie zur Nationalen VersorgungsLeitlinie „Therapie des Typ-2-Diabetes“ 2015; Available from <http://www.leitlinien.de/nvl/diabetes/therapie>. Accessed 19 Mar 2018 [Patient guideline in German].
- [4] Grant A, Treweek S, Dreischulte T, Foy R, Guthrie B. Process evaluations for cluster-randomised trials of complex interventions: a proposed framework for design and reporting. *Trials* 2013;14:15.

**CONSORT 2010 checklist of information to include when reporting a cluster randomised trial**

| Section/Topic                    | Item No | Standard Checklist item                                                                                                 | Extension for cluster designs                                                                 | Page No *                 |
|----------------------------------|---------|-------------------------------------------------------------------------------------------------------------------------|-----------------------------------------------------------------------------------------------|---------------------------|
| <b>Title and abstract</b>        |         |                                                                                                                         |                                                                                               |                           |
|                                  | 1a      | Identification as a randomised trial in the title                                                                       | Identification as a cluster randomised trial in the title                                     | 1                         |
|                                  | 1b      | Structured summary of trial design, methods, results, and conclusions (for specific guidance see CONSORT for abstracts) | See table 2                                                                                   | 3-4                       |
| <b>Introduction</b>              |         |                                                                                                                         |                                                                                               |                           |
| <b>Background and objectives</b> | 2a      | Scientific background and explanation of rationale                                                                      | Rationale for using a cluster design                                                          | 6-7                       |
|                                  | 2b      | Specific objectives or hypotheses                                                                                       | Whether objectives pertain to the the cluster level, the individual participant level or both | 7, 10, study protocol [1] |
| <b>Methods</b>                   |         |                                                                                                                         |                                                                                               |                           |
| <b>Trial design</b>              | 3a      | Description of trial design (such as parallel, factorial) including allocation ratio                                    | Definition of cluster and description of how the design features apply to the clusters        | 7, study protocol [1]     |
|                                  | 3b      | Important changes to methods after trial commencement (such as eligibility criteria), with reasons                      |                                                                                               | 12, data supplement S1    |
| <b>Participants</b>              | 4a      | Eligibility criteria for participants                                                                                   | Eligibility criteria for clusters                                                             | 7-8, study protocol [1]   |
|                                  | 4b      | Settings and locations where the data were collected                                                                    |                                                                                               | 7-8, study protocol [1]   |

|                               |    |                                                                                                                                       |                                                                                                                                                                                                                    |                                            |
|-------------------------------|----|---------------------------------------------------------------------------------------------------------------------------------------|--------------------------------------------------------------------------------------------------------------------------------------------------------------------------------------------------------------------|--------------------------------------------|
| <b>Interventions</b>          | 5  | The interventions for each group with sufficient details to allow replication, including how and when they were actually administered | Whether interventions pertain to the cluster level, the individual participant level or both                                                                                                                       | 9, data supplement S2, study protocol [1]  |
| <b>Outcomes</b>               | 6a | Completely defined pre-specified primary and secondary outcome measures, including how and when they were assessed                    | Whether outcome measures pertain to the cluster level, the individual participant level or both                                                                                                                    | 10, study protocol [1], data supplement S3 |
|                               | 6b | Any changes to trial outcomes after the trial commenced, with reasons                                                                 |                                                                                                                                                                                                                    | Data supplement S1                         |
| <b>Sample size</b>            | 7a | How sample size was determined                                                                                                        | Method of calculation, number of clusters(s) (and whether equal or unequal cluster sizes are assumed), cluster size, a coefficient of intracluster correlation (ICC or $k$ ), and an indication of its uncertainty | 10-11, study protocol [1]                  |
|                               | 7b | When applicable, explanation of any interim analyses and stopping guidelines                                                          |                                                                                                                                                                                                                    | n.a.                                       |
| <b>Randomisation:</b>         |    |                                                                                                                                       |                                                                                                                                                                                                                    |                                            |
| <b>Sequence generation</b>    | 8a | Method used to generate the random allocation sequence                                                                                |                                                                                                                                                                                                                    | 11, study protocol [1]                     |
|                               | 8b | Type of randomisation; details of any restriction (such as blocking and block size)                                                   | Details of stratification or matching if used                                                                                                                                                                      | 11, study protocol [1]                     |
| <b>Allocation concealment</b> | 9  | Mechanism used to implement the random allocation sequence (such                                                                      | Specification that allocation was based on clusters rather than individuals and whether                                                                                                                            | 11, study protocol [1]                     |



|                       |                                                                                                                            |                                                                                                                                                                     |                         |
|-----------------------|----------------------------------------------------------------------------------------------------------------------------|---------------------------------------------------------------------------------------------------------------------------------------------------------------------|-------------------------|
| <b>mechanism</b>      | as sequentially numbered containers), describing any steps taken to conceal the sequence until interventions were assigned | allocation concealment (if any) was at the cluster level, the individual participant level or both                                                                  |                         |
| <b>Implementation</b> | 10 Who generated the random allocation sequence, who enrolled participants, and who assigned participants to interventions | Replace by 10a, 10b and 10c                                                                                                                                         |                         |
|                       | 10a                                                                                                                        | Who generated the random allocation sequence, who enrolled clusters, and who assigned clusters to interventions                                                     | 8-9, data supplement S1 |
|                       | 10b                                                                                                                        | Mechanism by which individual participants were included in clusters for the purposes of the trial (such as complete enumeration, random sampling)                  | 8-9, data supplement S1 |
|                       | 10c                                                                                                                        | From whom consent was sought (representatives of the cluster, or individual cluster members, or both), and whether consent was sought before or after randomisation | 7                       |
|                       |                                                                                                                            |                                                                                                                                                                     |                         |
| <b>Blinding</b>       | 11a If done, who was blinded after assignment to interventions (for example, participants, care providers, those           |                                                                                                                                                                     | 10-11                   |

|                                                             |     |                                                                                                                                                |                                                                                                                                             |                                           |
|-------------------------------------------------------------|-----|------------------------------------------------------------------------------------------------------------------------------------------------|---------------------------------------------------------------------------------------------------------------------------------------------|-------------------------------------------|
|                                                             |     | assessing outcomes) and how                                                                                                                    |                                                                                                                                             |                                           |
|                                                             | 11b | If relevant, description of the similarity of interventions                                                                                    |                                                                                                                                             | 9, data supplement S2, study protocol [1] |
| <b>Statistical methods</b>                                  | 12a | Statistical methods used to compare groups for primary and secondary outcomes                                                                  | How clustering was taken into account                                                                                                       | 11-12, study protocol [1]                 |
|                                                             | 12b | Methods for additional analyses, such as subgroup analyses and adjusted analyses                                                               |                                                                                                                                             | 11-12, study protocol [1]                 |
| <b>Results</b>                                              |     |                                                                                                                                                |                                                                                                                                             |                                           |
| <b>Participant flow (a diagram is strongly recommended)</b> | 13a | For each group, the numbers of participants who were randomly assigned, received intended treatment, and were analysed for the primary outcome | For each group, the numbers of clusters that were randomly assigned, received intended treatment, and were analysed for the primary outcome | 12, Fig 1                                 |
|                                                             | 13b | For each group, losses and exclusions after randomisation, together with reasons                                                               | For each group, losses and exclusions for both clusters and individual cluster members                                                      | 12, Fig 1                                 |
| <b>Recruitment</b>                                          | 14a | Dates defining the periods of recruitment and follow-up                                                                                        |                                                                                                                                             | 8-9, data supplement S1                   |
|                                                             | 14b | Why the trial ended or was stopped                                                                                                             |                                                                                                                                             | n.a.                                      |
| <b>Baseline data</b>                                        | 15  | A table showing baseline demographic and clinical characteristics for each group                                                               | Baseline characteristics for the individual and cluster levels as applicable for each group                                                 | Table 1, data supplement S9               |

|                                |     |                                                                                                                                                   |                                                                                                                                            |                                          |
|--------------------------------|-----|---------------------------------------------------------------------------------------------------------------------------------------------------|--------------------------------------------------------------------------------------------------------------------------------------------|------------------------------------------|
| <b>Numbers analysed</b>        | 16  | For each group, number of participants (denominator) included in each analysis and whether the analysis was by original assigned groups           | For each group, number of clusters included in each analysis                                                                               | Tables 2-4, data supplement S4-S8        |
| <b>Outcomes and estimation</b> | 17a | For each primary and secondary outcome, results for each group, and the estimated effect size and its precision (such as 95% confidence interval) | Results at the individual or cluster level as applicable and a coefficient of intracluster correlation (ICC or k) for each primary outcome | 12-13, Tables 2-4, data supplement S4-S8 |
|                                | 17b | For binary outcomes, presentation of both absolute and relative effect sizes is recommended                                                       |                                                                                                                                            | 12-13, Tables 2-4, data supplement S4-S8 |
| <b>Ancillary analyses</b>      | 18  | Results of any other analyses performed, including subgroup analyses and adjusted analyses, distinguishing pre-specified from exploratory         |                                                                                                                                            | 12-13                                    |
| <b>Harms</b>                   | 19  | All important harms or unintended effects in each group (for specific guidance see CONSORT for harms)                                             |                                                                                                                                            | 14-15, data supplement S9                |
| <b>Discussion</b>              |     |                                                                                                                                                   |                                                                                                                                            |                                          |
| <b>Limitations</b>             | 20  | Trial limitations, addressing sources of potential bias, imprecision, and, if relevant, multiplicity of analyses                                  |                                                                                                                                            | 15-16                                    |

|                          |    |                                                                                                               |                                                                           |                       |
|--------------------------|----|---------------------------------------------------------------------------------------------------------------|---------------------------------------------------------------------------|-----------------------|
| <b>Generalisability</b>  | 21 | Generalisability (external validity, applicability) of the trial findings                                     | Generalisability to clusters and/or individual participants (as relevant) | 15, 17-18             |
| <b>Interpretation</b>    | 22 | Interpretation consistent with results, balancing benefits and harms, and considering other relevant evidence |                                                                           | 15-16, 18             |
| <b>Other information</b> |    |                                                                                                               |                                                                           |                       |
| <b>Registration</b>      | 23 | Registration number and name of trial registry                                                                |                                                                           | 4                     |
| <b>Protocol</b>          | 24 | Where the full trial protocol can be accessed, if available                                                   |                                                                           | 7, study protocol [1] |
| <b>Funding</b>           | 25 | Sources of funding and other support (such as supply of drugs), role of funders                               |                                                                           | 20                    |

\* Note: page numbers optional depending on journal requirements

[1] Buhse S, Mühlhauser I, Kuniss N et al. An informed shared decision making programme on the prevention of myocardial infarction for patients with type 2 diabetes in primary care: protocol of a cluster randomised, controlled trial. BMC Fam Pract 2015;16:43.

# BMJ Open

## An informed shared decision making programme for patients with type 2 diabetes in primary care: cluster randomised controlled trial

|                                 |                                                                                                                                                                                                                                                                                                                                                                                                                                                                                                                                                                                                                                                                                                                                                                                                                                                                                            |
|---------------------------------|--------------------------------------------------------------------------------------------------------------------------------------------------------------------------------------------------------------------------------------------------------------------------------------------------------------------------------------------------------------------------------------------------------------------------------------------------------------------------------------------------------------------------------------------------------------------------------------------------------------------------------------------------------------------------------------------------------------------------------------------------------------------------------------------------------------------------------------------------------------------------------------------|
| Journal:                        | <i>BMJ Open</i>                                                                                                                                                                                                                                                                                                                                                                                                                                                                                                                                                                                                                                                                                                                                                                                                                                                                            |
| Manuscript ID                   | bmjopen-2018-024004.R1                                                                                                                                                                                                                                                                                                                                                                                                                                                                                                                                                                                                                                                                                                                                                                                                                                                                     |
| Article Type:                   | Research                                                                                                                                                                                                                                                                                                                                                                                                                                                                                                                                                                                                                                                                                                                                                                                                                                                                                   |
| Date Submitted by the Author:   | 22-Aug-2018                                                                                                                                                                                                                                                                                                                                                                                                                                                                                                                                                                                                                                                                                                                                                                                                                                                                                |
| Complete List of Authors:       | Buhse, Susanne; University of Hamburg, Faculty of Mathematics, Informatics and Natural Sciences, Health Sciences and Education<br>Kuniss, Nadine; Jena University Hospital, Department of Internal Medicine III, Endocrinology and Metabolic Diseases; Diabetes Centre Thuringia<br>Liethmann, Kathrin; University of Hamburg, Faculty of Mathematics, Informatics and Natural Sciences, Health Sciences and Education; University Medical Center Schleswig Holstein, Institute of Medical Psychology and Sociology<br>Müller, Ulrich; Jena University Hospital, Department of Internal Medicine III, Endocrinology and Metabolic Diseases; Diabetes Centre Thuringia<br>Lehmann, Thomas; Universitätsklinikum Jena, Institute of Medical statistics<br>Mühlhauser, Ingrid; University of Hamburg, Faculty of Mathematics, Informatics and Natural Sciences, Health Sciences and Education |
| <b>Primary Subject Heading</b>: | General practice / Family practice                                                                                                                                                                                                                                                                                                                                                                                                                                                                                                                                                                                                                                                                                                                                                                                                                                                         |
| Secondary Subject Heading:      | Patient-centred medicine, Evidence based practice, Diabetes and endocrinology                                                                                                                                                                                                                                                                                                                                                                                                                                                                                                                                                                                                                                                                                                                                                                                                              |
| Keywords:                       | PRIMARY CARE, Diabetes Mellitus, Type 2, Decision Support Techniques, Patient Education as Topic, Health Educators, Health Knowledge, Attitudes, Practice                                                                                                                                                                                                                                                                                                                                                                                                                                                                                                                                                                                                                                                                                                                                  |
|                                 |                                                                                                                                                                                                                                                                                                                                                                                                                                                                                                                                                                                                                                                                                                                                                                                                                                                                                            |

SCHOLARONE™  
Manuscripts

1  
2  
3 **An informed shared decision making programme for patients with type 2 diabetes**  
4  
5 **in primary care: cluster randomised controlled trial**  
6  
7  
8

9 Susanne Buhse<sup>1</sup>, Nadine Kuniss<sup>2,3</sup>, Kathrin Liethmann<sup>1,4</sup>, Ulrich A Müller<sup>2,3</sup>, Thomas Lehmann<sup>5</sup>,  
10  
11 Ingrid Mühlhauser<sup>1</sup>  
12  
13

14  
15  
16 <sup>1</sup>Health Sciences and Education, University of Hamburg, Hamburg, Germany,  
17

18 <sup>2</sup>Department of Internal Medicine III, Endocrinology and Metabolic Diseases, Jena University  
19  
20 Hospital, Jena, Germany  
21

22 <sup>3</sup>Diabetes Centre Thuringia, Jena, Germany  
23

24 <sup>4</sup>Institute of Medical Psychology and Sociology, University Medical Center Schleswig Holstein,  
25  
26 Kiel, Germany  
27

28 <sup>5</sup>Centre for Clinical Studies, Jena University Hospital, Jena, Germany  
29  
30  
31

32  
33 Susanne Buhse, senior researcher  
34

35 Nadine Kuniss, research fellow  
36

37 Kathrin Liethmann, psychologist  
38

39 Ulrich Alfons Müller, professor of internal medicine  
40

41 Thomas Lehmann, biostatistician  
42

43 Ingrid Mühlhauser, professor of health sciences and education  
44  
45  
46

47  
48 Corresponding author: Susanne Buhse, Email: Susanne.Buhse@uni-hamburg.de  
49

50 University of Hamburg, Faculty of Mathematics, Informatics and Natural Sciences, Health  
51  
52 Sciences and Education, Martin-Luther-King-Platz 6, 20146 Hamburg  
53  
54  
55

56 Word count of main text: 4299 words  
57  
58  
59  
60

1  
2  
3 **Keywords**  
4

5 Diabetes Mellitus, Type 2; Decision Making; Decision Support Techniques; Patient Education as  
6  
7 Topic; Health Knowledge, Attitudes, Practice; Evidence-Based Medicine; Hypertension; Family  
8  
9 Practice; Health Educators; Physicians, Primary Care  
10  
11  
12  
13  
14  
15  
16  
17  
18  
19  
20  
21  
22  
23  
24  
25  
26  
27  
28  
29  
30  
31  
32  
33  
34  
35  
36  
37  
38  
39  
40  
41  
42  
43  
44  
45  
46  
47  
48  
49  
50  
51  
52  
53  
54  
55  
56  
57  
58  
59  
60

For peer review only

## Abstract

**Objective** To translate an informed shared decision making programme (ISDM-P) for patients with type 2 diabetes from a specialized diabetes centre to the primary care setting.

**Design** Patient-blinded, two-arm multicentre, cluster RCT of 6 months follow-up; concealed randomisation of practices after patient recruitment and acquisition of baseline data.

**Setting** 22 general practices providing care according to the German Disease Management Programme (DMP) for type 2 diabetes.

**Participants** 279 of 363 eligible patients without myocardial infarction or stroke.

**Interventions** The ISDM-P comprises a patient decision aid, a corresponding group teaching session provided by medical assistants and a structured patient-physician encounter. Control group received standard DMP care.

**Primary and secondary outcome measures** Primary endpoint was patient adherence to antihypertensive or statin drug therapy by comparing prescriptions and patient-reported uptake after 6 months. Secondary endpoints included informed choice, risk knowledge (score 0 to 11 from 11 questions) and prioritised treatment goals of patients and doctors.

**Results** ISDM-P: 11 practices with 151 patients; standard care: 11 practices with 128 patients; attrition rate: 3.9%. There was no difference between groups regarding the primary endpoint. Mean drug adherence rates were high for both groups (80% for antihypertensive and 91% for statin treatment). More ISDM-P patients made informed choices regarding statin intake, 34% vs 3%, Odds Ratio [OR] 16.6 (95% CI 4.4 to 63.0), blood pressure control, 39% vs 3%, OR 22.2 (5.3 to 93.3) and HbA1c, 43% vs 3%, OR 26.0 (6.5 to 104.8). ISDM-P patients achieved higher levels of risk knowledge, with a mean score of 6.96 vs 2.86, difference 4.06 (2.96 to 5.17). In the ISDM-P group, agreement on prioritised treatment goals between patients and doctors was higher, with 88.5% vs 57%.

**Conclusions** The ISDM-P was successfully implemented in general practices. Adherence to medication was very high making improvements hardly detectable.



1  
2  
3  
4  
5  
6  
7  
8  
9  
10  
11  
12  
13  
14  
15  
16  
17  
18  
19  
20  
21  
22  
23  
24  
25  
26  
27  
28  
29  
30  
31  
32  
33  
34  
35  
36  
37  
38  
39  
40  
41  
42  
43  
44  
45  
46  
47  
48  
49  
50  
51  
52  
53  
54  
55  
56  
57  
58  
59  
60

**Trial registration** ISRCTN77300204

For peer review only

### Strengths and limitations of this study

- This cluster RCT followed the UK MRC framework for complex interventions and is the final step of the development and evaluation of an informed shared decision making programme (ISDM-P) for patients with type 2 diabetes.
- Efficacy of the ISDM-P was demonstrated in a former RCT under high fidelity conditions in a diabetes centre. In this cluster RCT, the ISDM-P was integrated into routine care by addressing implementation barriers.
- The cluster RCT was meticulously designed and conducted with a low drop-out rate; practices were only randomised after completion of patient recruitment and acquisition of baseline data.
- It was planned to keep the patients blinded, but it was impossible to keep the health care providers (practices) blinded.
- Since there is no gold standard to assess SDM in routine care, the patient-held sheet for personal treatment goals might be used as a surrogate indicator for SDM in diabetes care.

## Introduction

Diabetes guidelines explicitly recommend shared decision making (SDM) to help patients and physicians to make informed choices and to select the treatment that best fits individual patient needs, values and preferences.<sup>1 2</sup> Patients increasingly want to participate in making decisions about their health, and they have the right to be involved.<sup>3</sup> However, SDM is not yet implemented in diabetes care<sup>4</sup>, and a number of barriers have been identified that are hindering this.<sup>5</sup> While many clinicians believe that they already practice SDM, they in fact do not involve patients in treatment decision making.<sup>5 6</sup> Physicians are used to deciding what they consider best for their patients. Even if healthcare professionals are aware of such misconceptions about SDM, organisational structures (and mainly time constraints) are often perceived as barriers for patient involvement. Another challenge is the generally poor science literacy among health professionals and patients, and a lack of competencies for communicating and understanding risk information.<sup>7-9</sup> Finally, there is a paucity of evidence-based patient information material such as decision aids or drug facts boxes, which display probabilities of benefits and harms of options and are the basis for informed decision making.<sup>10 11</sup> There are only a few projects on decision aids and SDM in diabetes care; these address different treatment regimens,<sup>12</sup> statin treatment,<sup>13-15</sup> oral antidiabetic agents,<sup>16 17</sup> starting insulin injections,<sup>18</sup> or prevention of macro- and microvascular complications.<sup>19</sup> Results about efficacy or implementation are ambiguous.

We have developed an informed shared decision making programme (ISDM-P) for patients with type 2 diabetes that targets implementation barriers.<sup>20 21</sup> The ISDM-P comprises an evidence-based patient decision aid, a corresponding teaching session provided by specially trained medical assistants (MAs) and a structured patient-physician encounter. MAs and doctors are trained to provide risk information and to conduct consultations based on SDM principles. The ISDM-P is designed to be easily integrated in the structured treatment and teaching programme<sup>22-25</sup> used in the German Disease Management Programme (DMP).<sup>26</sup> We have compared the ISDM-P to a structurally equivalent control intervention in a proof-of-concept

1  
2  
3 randomised controlled trial at a single diabetes centre.<sup>21</sup> About half of the ISDM-P patients, but  
4  
5 none of the patients in the usual care group, attained adequate risk knowledge to make informed  
6  
7 decisions. Nonetheless, patients' treatment preferences were not adequately considered by  
8  
9 physicians in decision making. Although physicians expressed a positive attitude towards SDM,  
10  
11 they had not been specifically trained in SDM. Therefore, we developed additional programme  
12  
13 components to facilitate SDM-based patient-physician consultations.<sup>27</sup>  
14

15  
16 In the present study, we investigated whether the results of the proof-of-concept RCT<sup>21</sup> could be  
17  
18 repeated under routine care conditions for patients with type 2 diabetes.. The aim was to  
19  
20 translate the optimised ISDM-P to the primary healthcare setting.  
21  
22  
23

## 24 **Methods**

### 25 **Study design**

26  
27  
28 The study was a two-arm, multicentre cluster randomised controlled trial with six months  
29  
30 follow-up. According to international standards for the development and evaluation of complex  
31  
32 interventions, we additionally focused on implementation conditions and process parameters.<sup>28-</sup>  
33

34  
35 <sup>31</sup> A detailed protocol has been published.<sup>27</sup>  
36  
37  
38

### 39 **Patient involvement**

40  
41 In order to address patient and public involvement, patients participated in the development of  
42  
43 the intervention material. We did not involve patients in the design of this study. After publication  
44  
45 of the study we will write a plain language summary and design a leaflet for distribution to patient  
46  
47 groups. It will also be available on the project website ([www.diabetes-und-herzinfarkt.de](http://www.diabetes-und-herzinfarkt.de)).  
48  
49  
50

### 51 **Context and setting**

52  
53 In Germany, care for patients with type 2 diabetes is usually provided by family physicians at the  
54  
55 primary health care level. The study took place in 21 primary care practices in East Germany  
56  
57  
58  
59  
60

1  
2  
3 (Free State of Thuringia and Saxony-Anhalt) and one in the city of Hamburg. Practices were  
4 included if they provided structured teaching and treatment according to the German DMP for  
5 type 2 diabetes.<sup>32 33</sup> Patient education was provided by diabetes educators or MAs with special  
6 training in diabetes education.<sup>34</sup> All practices gave informed consent. A more detailed description  
7 is given in the protocol.<sup>27</sup>  
8  
9  
10  
11  
12  
13  
14

## 15 Participants

16 Patients between 40 and 69 years who had been diagnosed with type 2 diabetes, had HbA1c  
17 levels of <9% and had previously participated in structured DMP teaching sessions were  
18 included. Exclusion criteria were a history of ischemic heart disease (ICD I20-I25) or stroke (ICD  
19 I63), proliferative retinopathy, chronic kidney disease stage 3 or higher or care by a legal  
20 guardian. All participants gave informed written consent.  
21  
22  
23  
24  
25  
26  
27  
28  
29

## 30 Study recruitment

31 A total of 307 general practices of the study regions were informed about the project by mail  
32 (Figure). Two weeks later, the practices were called and asked whether they were interested in  
33 participating in the study. Supported by the research associate, MAs and general practitioners  
34 (GPs) of each practice screened the patient records for eligibility. Patients of the included  
35 practices were then informed about the study by a letter and invited to participate during the next  
36 consultation with their GPs. After patients who were willing to participate had given informed  
37 consent, baseline data were retrieved directly from patients and supplemented by standard data  
38 extracted from the electronic patient records.  
39  
40  
41  
42  
43  
44  
45  
46  
47  
48

49 Concealed external randomisation of practices (cluster) started only after conclusion of patient  
50 recruitment and collection of baseline data at the study centre.  
51  
52

53 The study was approved by the ethics committee of the Medical Association of the Federal State  
54 of Thuringia in April 2014. It was submitted to registration in February 2015. The study protocol  
55  
56  
57

1  
2  
3 was published in March 2015.<sup>27</sup> In order to avoid undue delays in recruitment of study  
4 participants, we started enrolment of family practices and patients in December 2014. During  
5 that time, we checked if prescription rates of statins and antihypertensive agents were  
6 comparable between our former proof-of-concept study and the primary care setting to make  
7 sure that our sample size calculation is adequate. Practices were randomised only after trial  
8 registration and after publication of the study protocol. In fact, we did not change our original  
9 sample size calculation. We think that our approach did not bias our study results. The last  
10 practice was enrolled in August 2015, and the last patient, in April 2016. The overall trial end  
11 date should have been July 2016, but as some practices required more time for patient  
12 recruitment, data collection was completed in March 2017. Please refer to data supplement: S1  
13 Study procedure and registration, for in depth detail of this.  
14  
15  
16  
17  
18  
19  
20  
21  
22  
23  
24  
25  
26  
27

## 28 Intervention

29  
30 The ISDM-P comprises a number of interrelated components (data supplement S2).<sup>27</sup> Those  
31 components that had already been tested in the proof-of-concept RCT<sup>21</sup> were: 1) an  
32 evidence-based patient decision aid about the primary prevention of myocardial infarction and  
33 other diabetes-related complications<sup>20</sup>; 2) a structured group teaching session provided by MAs;  
34 and 3) a provider training for MAs. The additional components developed for implementation in  
35 routine care were: 4) a patient-held documentation sheet with patient-defined treatment goals, to  
36 be shared and discussed by the patient with the GP; and 5) a six-hour training to prepare GPs  
37 for consultations in terms of SDM.<sup>27</sup>  
38  
39  
40  
41  
42  
43  
44  
45  
46

47 The ISDM-P addresses various facilitators and barriers of SDM implementation.<sup>5 35 36</sup> In the  
48 patient-teaching session, MAs provided evidence-based risk information and assured that the  
49 patients understood it by using question cards to identify knowledge gaps and to repeat content,  
50 if necessary. Further, they helped patients to set individual treatment goals and to document  
51 them on the patient-held sheet. The sheet ensured that individual patient set goals were  
52  
53  
54  
55  
56  
57  
58  
59  
60

1  
2  
3 discussed in the subsequent patient-physician encounter. Finally, both, patients and GPs  
4 documented their common goals on the patient-held sheet. A copy remained in the patient  
5 record. Please refer to data supplement S3 for details on the sheet – note that this has been  
6 translated from German to English.  
7  
8  
9  
10

### 11 12 13 Comparison

14  
15 The control group received standard care supplemented with a brief extract of the patients'  
16 version of the German National Disease Management Guidelines on the treatment of patients  
17 with type 2 diabetes, with a link to the full version of the guideline.<sup>37</sup>  
18  
19  
20  
21  
22  
23

### 24 Outcome measures

25  
26 The primary outcome measure was adherence to antihypertensive or statin therapy,  
27 operationalised as adherence to prescribed medication as documented in the patients' records  
28 at the six-month follow-up. Our hypothesis was that patients would be more adherent when they  
29 defined personal treatment goals together with their healthcare professionals. For more details  
30 on selection of the primary endpoint, please refer to the protocol.<sup>27</sup>  
31  
32  
33  
34  
35  
36

37 A blinded external study assistant conducted telephone interviews with all patients to assess the  
38 primary endpoint after 6 months. She was specifically trained by the psychologist who co-  
39 authored the study (KL) to perform the interview. A standardised interview guide was used.  
40  
41 Patients were considered to have been adherent if their answers were consistent with the  
42 prescription documented in the patients' record.  
43  
44  
45  
46

47 Secondary endpoints included: 1) informed choices about statin treatment, blood pressure  
48 control, glucose control and smoking cessation; 2) risk knowledge; 3) realistic expectations  
49 about individual heart attack risks and effects of preventive options; 4) achievement and 5)  
50 prioritisation of treatment goals.<sup>27</sup>  
51  
52  
53  
54  
55  
56  
57  
58  
59  
60

1  
2  
3 The adapted multi-dimensional parameter *informed choice*<sup>38</sup> tests for adequate knowledge (e.g.,  
4 correctly answering 8 out of 11 items of the validated questionnaire<sup>27</sup>) and achievement of  
5 treatment goals. A patient with adequate knowledge and who had achieved the personal  
6 treatment goal was considered as having made an informed choice. How well the treatment  
7 goals (including prioritisation of goals) of patients and GPs matched was assessed as an  
8 indicator of SDM. In addition, changes in medication prescriptions and clinical parameters,  
9 including HbA1c levels, cholesterol and blood pressure, was assessed from baseline to  
10 follow-up.  
11  
12  
13  
14  
15  
16  
17  
18  
19  
20  
21

### 22 Sample size

23  
24 It was assumed that 80% of patients in the ISDM-P group would adhere to prescriptions of  
25 antihypertensive and statin medication, as compared to 60% of the control group.<sup>27</sup> An intra-  
26 cluster correlation coefficient (ICC) of 0.03, and a mean cluster size of 13 patients, were  
27 estimated. Using estimations of 1.36 for design effect (DE), 80% power, 5% significance level  
28 and a 20% drop-out rate, the calculated sample size was 306 patients distributed over 24  
29 practices (clusters).  
30  
31  
32  
33  
34  
35  
36  
37  
38

### 39 Randomisation and blinding

40  
41 Concealed randomisation was performed in blocks of four practices using a computer-generated  
42 allocation sequence, after patient recruitment and collection of baseline data, by the Centre for  
43 Clinical Studies at the Jena University Hospital. Blinding of practices was not feasible. However,  
44 an attempt to conceal allocation for patients was made. At follow-up, patients were asked "*In*  
45 *your opinion, did you receive new or more-of-the-same information?*" Assessment of the primary  
46 endpoint, data entry and analyses were kept blinded against study allocation.  
47  
48  
49  
50  
51  
52  
53  
54

### 55 Statistical analysis



1  
2  
3 Statistical analyses were carried out by intention-to-treat.<sup>27</sup> For main endpoints, missing data  
4 was imputed using the method of multiple imputations. Therefore, an extensive set was used of  
5 baseline covariates and, when appropriate, outcome specific variables, i.e., blood pressure, age,  
6 gender, graduation status and prescribed medication.  
7  
8

9  
10  
11 Generalised mixed models were fitted to compare the groups with respect to rates of adherence,  
12 informed choice and individual goal achievement, with intervention as a fixed effect and  
13 practices as a random effect. Cluster-adjusted OR and 95% confidence intervals (CI) were  
14 calculated. We used linear mixed models to compare study groups regarding average  
15 differences between planned and achieved values of blood pressure and HbA1c, the level of  
16 knowledge, realistic expectations and change of clinical parameters (from baseline to 6-months  
17 follow-up). Cluster-adjusted mean differences with 95% CI were calculated. No central  
18 laboratory analysis was carried out for the study, as practices contract various laboratories.  
19  
20  
21  
22  
23  
24  
25  
26  
27  
28 Deviations from the protocol are described in data supplement: S1.  
29  
30  
31

### 32 Process evaluation

33  
34 Barriers and facilitators of implementing the ISDM-P in routine care were identified using the  
35 documentation from the MAs for the teaching sessions as well as interviews with MAs and GPs  
36 of each ISDM-P practice. Interviews focused on workload and attitudes towards the ISDM-P as  
37 well as on experiences with teaching, such as organisational aspects or use of teaching  
38 material.  
39  
40  
41  
42  
43  
44  
45  
46

### 47 Results

48  
49 Of the 307 invited general practices, 22 were recruited; of the 363 eligible patients, 279  
50 participated (with informed consent). Eleven practices (with 151 patients) were randomised to  
51 ISDM-P, and 11 practices (with 128 patients), to standard care (Fig. 1). Baseline characteristics  
52 were comparable between groups (Table 1). Fifteen patients of the ISDM-P group did not  
53  
54  
55  
56  
57  
58  
59  
60

1  
2  
3 participate in the teaching session and eight were lost to follow-up. In the control group, three  
4 patients were lost to follow-up. About half of the patients in both groups thought they received  
5 the usual information. More patients in the ISDM-P group responded that they received new  
6 information (38% compared to 19%).  
7  
8  
9  
10

#### 11 12 13 Primary outcome

14  
15 At follow-up, 218 patients were prescribed antihypertensive drugs and 107 patients, statins.  
16 Adherence rates to antihypertensive and statin medications were high for both groups, with no  
17 difference between groups (Table 2). Missing data did not affect the results.  
18  
19  
20  
21  
22  
23

#### 24 Secondary outcomes

25  
26 More ISDM-P patients made informed choices regarding statin intake, blood pressure control  
27 and glucose control (Table 3). There were less than 20% smokers in both groups. We found no  
28 difference in informed choices regarding smoking cessation. A total of 136 ISDM-P patients  
29 (90%) and 109 control group patients (85%) completed the knowledge test (score of 0 to 11).  
30 The mean score was 6.96 for ISDM-P, versus 2.86 for the control group (adjusted mean  
31 difference 4.06 [2.96 to 5.17]; <0.001). The mean score for the domain realistic expectations  
32 (score of 0 to 5) was 3.09 for ISDM-P patients, versus 0.92 for standard care patients (2.18 [1.67  
33 to 2.69]; <0.001) (data supplement S4). Significantly more ISDM-P patients had adequate risk  
34 knowledge (Table 3).  
35  
36  
37  
38  
39  
40  
41  
42  
43  
44

45 For estimating personal heart attack risk, 131 ISDM-P and 96 standard care patients  
46 participated. The absolute difference of the patient estimated individual risks and objective risks  
47 was greater in the control group (5.5% versus 31.1%; adjusted difference -25.6% [-30.4% to -  
48 20.8%]; <0.001). This result was confirmed after multiple imputation of missing data. Notably,  
49 most patients in the control group overestimated their personal heart attack risk (data  
50 supplement S5 and S6).  
51  
52  
53  
54  
55  
56  
57  
58  
59  
60

1  
2  
3 There was no difference between groups with respect to meeting treatment goals at follow-up.  
4  
5 Most patients in both groups achieved their goals regarding statins (85.8% of ISDM-P patients  
6  
7 versus 87% of control group patients), blood pressure (93.7% versus 90%), and HbA1c (94.7%  
8  
9 versus 89.1%) (data supplement S7). No substantial changes within groups from baseline to  
10  
11 follow-up were observed for HbA1c levels, systolic blood pressure values, total cholesterol  
12  
13 levels, LDL cholesterol levels or medication prescriptions (data not shown).  
14

15  
16 Prioritisation of treatment goals differed significantly between groups. More ISDM-P patients  
17  
18 prioritised blood pressure control rather than HbA1c targets (28% versus 12%;  $p < 0.015$ ) (data  
19  
20 supplement S8).  
21

22 Matching of treatment goals of GPs and patients were higher for the ISDM-P group (Table 4).  
23

24 Significant differences in favour of the ISDM-P group were found for treatment goals regarding  
25  
26 blood pressure values, HbA1c-levels and the prioritised goal. These results remained  
27  
28 unchanged after multiple imputation of missing data.  
29  
30

### 31 32 **Process evaluation**

33  
34 Characteristics of practices, such as numbers of employed MAs, GPs and patients, were  
35  
36 comparable between groups (data supplement S9).  
37

#### 38 39 *ISDM-P patient teaching module*

40  
41 Overall, 35 teaching sessions were provided by ISDM-P practices. MAs conducted 2 to 6  
42  
43 sessions that lasted between 50 and 120 minutes. Group sizes varied from one to seven  
44  
45 patients. MAs stated that they felt well prepared for the ISDM teaching module. Role playing and  
46  
47 question cards related to the content of the ISDM-P were identified as facilitators for training  
48  
49 success. Before the study, MAs were unfamiliar with risk communication. Some MAs and some  
50  
51 patients indicated that there was too much statistics to explain/understand, while a few patients  
52  
53 stated that there was not enough information about statistics. Overall, MAs felt that patients were  
54  
55  
56  
57  
58  
59  
60

1  
2  
3 appreciative for the opportunity to participate in the decision making process and to define their  
4  
5 own treatment goals.

### 6 7 *ISDM-P consultations*

8  
9 Patients consulted their GPs directly after the teaching session or within one to three weeks  
10  
11 afterwards. The consultations lasted between 5 and 20 minutes (mean 11.4 minutes). GPs  
12  
13 stated that the patients had been well prepared for decision making by their MAs, which was  
14  
15 “*better than expected*” and “*better than usual*”. They experienced changes in communication  
16  
17 following the ISDM-P teaching module. One GP stated that former consultations were more  
18  
19 “*instructive, demanding, and in some ways authoritarian*”, and found that after training, patients  
20  
21 and professional teams “*meet on an equal footing*”.

### 22 23 *Workload*

24  
25 MAs described the efforts of training and practicing for the teaching module as similar as for  
26  
27 standard DMP patient education modules. Most GPs and MAs described the overall workload as  
28  
29 appropriate. GPs considered the intended distribution of work within the team as helpful and  
30  
31 reduced workload. Most practices would provide the ISDM-P in routine care if it was covered by  
32  
33 health insurances. See supplement S9 for more details.  
34  
35  
36  
37  
38

## 39 **Discussion**

### 40 41 *Statement of principle findings*

42  
43 Results from our single centre proof-of-concept RCT<sup>21</sup> were confirmed in this multicentre cluster  
44  
45 RCT. The programme could be translated from a university-based diabetes centre to everyday  
46  
47 primary care. ISDM-P patients were more likely to make informed choices, while the standard  
48  
49 care control group did not make informed decisions. The ISDM-P group showed increased  
50  
51 knowledge and realistic expectations regarding their individual cardiac risk and probabilities of  
52  
53 the benefits and harms of preventive treatment options. Treatment goals between patients and  
54  
55 their physicians were more matched for the intervention group. The patient-held documentation  
56  
57  
58  
59  
60

1  
2  
3 sheet of personal treatment objectives supported patients and GPs in deliberating treatment  
4 goals and preferences. In fact, better informed patients appeared to trigger more rational  
5 evidence-based goal setting among physicians. Contrary to our predefined hypotheses,  
6 adherence to medication was very high overall in this study population, making further  
7 improvements undetectable. Overall, we believe that the ISDM-P was successfully implemented  
8 in the general practices.  
9  
10  
11  
12  
13  
14

### 15 16 17 18 *Strengths and weaknesses of the study*

19 Our study has several strengths. The intervention has been developed and evaluated according  
20 to the UK MRC framework for complex interventions.<sup>28</sup> Efficacy was demonstrated in an RCT  
21 under high fidelity conditions.<sup>21</sup> Findings of the RCT and qualitative process data were used to  
22 optimize the ISDM-P.<sup>27</sup> A recent publication has reviewed important barriers of SDM.<sup>5</sup> Our  
23 programme already addresses these barriers.  
24  
25  
26  
27  
28  
29

30 In order to facilitate integration into everyday practice, the structure and duration of the ISDM-P  
31 teaching session were adapted to standard teaching modules of the DMP.<sup>22-25</sup> The cluster RCT  
32 was meticulously designed and conducted with a low drop-out rate. Additional qualitative  
33 methods were used to gain insight into implementation processes.  
34  
35  
36  
37  
38

39 The weaknesses of the study include the inability to blind the study for the healthcare team for  
40 study allocation, due to the nature of the intervention. It also remains unclear to what degree  
41 patients were kept blinded. Further, we could not document the extent of SDM. There is no gold  
42 standard to quantify patient involvement,<sup>27 39</sup> and the use of decision aids does not accurately  
43 reflect SDM.<sup>40</sup> Video-taping and available instruments, such as MAPPIN'SDM, are not applicable  
44 for routine care conditions.<sup>41</sup> Thus, we had to define surrogate parameters. Risk knowledge is a  
45 prerequisite of informed SDM. The proof-of-concept RCT<sup>21</sup> showed that patients with standard  
46 care lack the necessary risk knowledge. Therefore, we used knowledge and informed choice as  
47 secondary endpoints. We hypothesised that successful ISDM would enable more patients to set  
48  
49  
50  
51  
52  
53  
54  
55  
56  
57

1  
2  
3 and achieve realistic and personally defined treatment goals. However, patients were already  
4 well controlled at the beginning of the study. Study participants were followed in the German  
5 DMP for type 2 diabetes. All had received structured education and were closely monitored. The  
6 proof-of-concept RCT indicated lower adherence rates to statin prescriptions in the standard  
7 care group. Adherence is a patient relevant endpoint that may reflect successful ISDM when it is  
8 based on adequate knowledge and mutual agreement on treatment goals between patients and  
9 health professionals. We hypothesised that patients would be more adherent to medication  
10 when prescriptions were based on SDM principles. However, in the present cluster RCT,  
11 adherence to antihypertensive medication and statins was very high already under standard  
12 care. Patients' self-reported adherence to medication uptake was used to assess the primary  
13 endpoint. Telephone interviews were conducted independently from practices, but socially  
14 desirable answers cannot be completely ruled out. The interviewer asked patients to read out  
15 the substance that was labelled on the medication boxes. To do that, patients had to have the  
16 medication box at home. No changes from baseline to follow-up were observed for prescription  
17 rates or clinical parameters (such as levels of HbA1c, blood pressure and cholesterol). Thus, it is  
18 very likely that adherence was already high at baseline. Generalizability of our results to other  
19 health care systems remains speculative. Our study participants had unexpectedly high  
20 adherence rates to prescribed medications and overall good control of diabetes and  
21 hypertension. This might be a result of diabetes care within the disease management  
22 programme for patients with type 2 diabetes in Germany. In populations with lower adherence  
23 rates, the ISDM<sup>+</sup> P could presumably improve adherence to medication. Our patient-held  
24 documentation sheet improved matching of treatment goals between patients and GPs and  
25 therefore might be used as a surrogate indicator for SDM. This sheet is an integral part of the  
26 intervention for supporting patient participation and, at the same time, a tool for the  
27 documentation of common treatment goals.  
28  
29  
30  
31  
32  
33  
34  
35  
36  
37  
38  
39  
40  
41  
42  
43  
44  
45  
46  
47  
48  
49  
50  
51  
52  
53  
54  
55  
56  
57  
58  
59  
60

1  
2  
3 *Strengths and weaknesses in relation to other studies, discussing important differences in*  
4 *results*  
5

6  
7 The *Statin Choice Decision Aid* was tested regarding statin adherence in a specialised clinic,<sup>14</sup>  
8 one primary care centre,<sup>13</sup> and several primary care practices in Spain.<sup>15</sup> Improvement of  
9 adherence was only found in the specialised clinic.<sup>14</sup> The *Diabetes Medication Choice Decision*  
10 *Aid* had no impact on adherence,<sup>17</sup> while one study even reported a better outcome in the  
11 control group.<sup>16</sup> In all publications, adherence rates were very high already under standard care.  
12 This is consistent with our study.  
13

14  
15 In a recent cluster RCT from the Netherlands (OPTIMAL), an SDM intervention also aimed at  
16 enhancing patients' achievement of treatment goals.<sup>12</sup> Patients were asked to choose between  
17 an intensive treatment strategy according to the ADDITION protocol and a less intensive  
18 treatment based on guideline recommendations. The findings showed no significant difference  
19 between the groups. Almost half of the patients in the intervention group switched from less  
20 intensive to intensive treatment.<sup>12</sup> However, benefits from intensifying therapy in type 2 diabetes  
21 are questionable. In our previous RCT on the ISDM-P, more patients achieved their HbA1c level  
22 goals because they set slightly higher HbA1c targets after the teaching session.<sup>21</sup> We offered  
23 and supported patients to prioritise and set realistic treatment goals. GPs of the OPTIMAL trial  
24 found the decision aid helpful, but it remains unclear if patients understood the information.<sup>12</sup>  
25 Most of the ISDM-P consultations with the GP did not take longer than usual consultations, with  
26 a mean duration of about 11 minutes. The implementation trial of the *Statin Choice Decision Aid*  
27 in Spain reported consultation times of almost 20 minutes without significant differences  
28 between intervention and control groups.<sup>15</sup> In our study, GPs just had to perform the last steps of  
29 the SDM process, as patients had been well prepared for decision making by MAs. Hence, GPs  
30 could discuss four health topics—blood glucose, blood pressure, statin use and smoking—and  
31 related treatment options with their patients in a single encounter. The duration of the group  
32 teaching session provided by MAs was comparable to other DMP teaching sessions.  
33  
34  
35  
36  
37  
38  
39  
40  
41  
42  
43  
44  
45  
46  
47  
48  
49  
50  
51  
52  
53  
54  
55  
56  
57  
58  
59  
60

1  
2  
3 Recently, Ballard et al. (2017) assessed the routine use of the *Statin Choice Decision Aid* and  
4 the *Diabetes Medication Choice Decision Aid* in a tertiary care centre under routine care.<sup>40</sup> Half  
5 of the clinicians used the statin choice decision aid and 9% the medication choice decision aid.  
6  
7 Reasons for not using the material were lack of awareness that the tools were available, time  
8 constraints and attitudinal barriers, e.g. clinicians found the decision aids not helpful or not  
9 accurate.<sup>40</sup> Recommendations to address such barriers are workshops to improve SDM skills,  
10 development of brief evidence-based consultation tools, interventions to prepare patients in  
11 decision making and the development of measurements to be used in practice to identify  
12 knowledge gaps and preferences.<sup>5</sup> Our ISDM intervention already addresses all these aspects.  
13  
14 The ISDM-P training included a demonstration of a patient teaching session and role play in  
15 order to help teams gain more insight into differences between usual counselling and SDM-  
16 based consultations. Our training took longer than trainings in other studies, but this time  
17 duration was perceived as appropriate by participants.  
18  
19  
20  
21  
22  
23  
24  
25  
26  
27  
28  
29  
30  
31

### 32 *Meaning of the study: possible explanations and implications for clinicians and policymakers*

33  
34 In our study, we determined that patients under standard care did not have adequate risk  
35 knowledge to make informed decisions. Healthcare providers do not have access to education  
36 and patient information material which fulfil the criteria for evidence-based health information.  
37  
38 The ISDM-P remedies this: it not only provides understandable and relevant risk information to  
39 healthcare personnel and patients, it also enables a patient-physician communication on equal  
40 footing and helps patients and GPs to pursue common treatment goals as recommended in  
41 DMP guidelines. Our study shows that the ISDM-P can be integrated in everyday practice  
42 without large extra effort. It meets the criteria to be covered by health insurance companies.  
43  
44  
45  
46  
47  
48  
49  
50  
51  
52

### 53 *Unanswered questions and future research*



1  
2  
3 Further research will focus on extending the ISDM-P concept to other clinical decisions. In  
4 particular, drug facts boxes on the increasing number of oral antidiabetic agents should be made  
5 available. Structured treatment and teaching programmes need to be updated and optimised  
6 based on criteria for evidence-based patient information and SDM.<sup>22 25 42</sup> Web-based formats  
7 allowing individual training and exchange with health care professionals have to be developed.  
8  
9

10  
11 This will also allow a more personalised selection of teaching modules on diabetes or  
12 hypertension care.  
13  
14

15  
16 Current clinical practice guidelines do not provide well-structured information on benefits and  
17 harms of medication or other treatments that could readily be used within consultations with  
18 patients. Fact boxes or other decision tools should be considered in guideline development.<sup>3 43</sup>  
19  
20

21  
22 Finally, open access trainings in evidence-based medicine, risk information and SDM for  
23 healthcare providers are required. Maintaining and updating an entire ISDM treatment and  
24 teaching programme, will require an up-to-date online platform for patients and healthcare  
25 providers.  
26  
27

28  
29 The implementation of the ISDM-P concept would meet national and international guideline  
30 recommendations as well as the patients' ethical and legal rights on true involvement in decision  
31 making.  
32  
33

### 34 35 36 37 38 39 40 41 **Acknowledgements**

42  
43 We thank the medical assistants, physicians and participating patients of all 22 primary care  
44 practices. We also thank Susanne Kählau-Meier for her valuable support in data collection and  
45 administration as well as Veronica A. Raker for editing the manuscript.  
46  
47  
48  
49

### 50 51 52 **Contributors**

53  
54 The study was carried out in collaboration between all authors. SB and IM designed the study.  
55  
56 SB and KL designed and tested the provider training. SB, NK and UAM were involved in the  
57  
58

1  
2  
3 planning, coordination and management of data acquisition at the study sites (primary care  
4 practices). TL did the statistical planning and analyses of the study. SB and IM wrote the first  
5 draft of the manuscript. NK, KL and UAM contributed to the draft of the manuscript. All authors  
6 critically revised the manuscript and approved the final version. The corresponding author  
7 attests that all listed authors meet authorship criteria and that no others meeting the criteria have  
8 been omitted.  
9  
10  
11  
12  
13  
14  
15  
16  
17

### 18 **Funding**

19  
20 This study was funded by the European Foundation for the Study of Diabetes (EFSD) on behalf  
21 of the European Association for the Study of Diabetes (EASD). NK's salary has been partly  
22 financed by the non-profit association "Diabeteszentrum Thüringen e.V." [Diabetes Centre  
23 Thuringia]. The EFSD and the Diabetes Centre Thuringia had no role in the design of the study,  
24 collection, analysis, and interpretation of data, and preparation and approval of the manuscript.  
25  
26  
27  
28  
29  
30  
31

### 32 **Competing interest**

33  
34 All authors have completed the ICMJE uniform disclosure form at  
35 [www.icmje.org/coi\\_disclosure.pdf](http://www.icmje.org/coi_disclosure.pdf) and declare: SB, NK, KL, and TL report grants from the EFSD  
36 during the conduct of the study; NK reports grant from the Diabetes Centre Thuringia during the  
37 conduct of the study; UAM and IM received no support from any organisation for the submitted  
38 work; all authors had no financial relationships with any organisations that might have an interest  
39 in the submitted work in the previous three years; no other relationships or activities that could  
40 appear to have influenced the submitted work.  
41  
42  
43  
44  
45  
46  
47  
48  
49  
50

### 51 **Ethics approval**

1  
2  
3 The study protocol was approved by the ethics committee of the Medical Association of  
4 Thuringia in April 2014 (ref: 29739/2014/31). All participants gave informed consent before  
5 taking part.  
6  
7  
8  
9

### 10 11 **Data sharing**

12  
13 The corresponding author can be contacted to forward request for data sharing.  
14  
15

### 16 17 **Transparency**

18  
19 The lead author (SB) affirms that the manuscript is an honest, accurate, and transparent account  
20 of the study being reported. No important aspects of the study have been omitted. Discrepancies  
21 from the study as planned have been explained.  
22  
23  
24  
25  
26  
27

### 28 29 **Copyright**

30  
31 "The Corresponding Author has the right to grant on behalf of all authors and does grant on  
32 behalf of all authors, a worldwide licence to the Publishers and its licensees in perpetuity, in all  
33 forms, formats and media (whether known now or created in the future), to i) publish, reproduce,  
34 distribute, display and store the Contribution, ii) translate the Contribution into other languages,  
35 create adaptations, reprints, include within collections and create summaries, extracts and/or,  
36 abstracts of the Contribution, iii) create any other derivative work(s) based on the Contribution,  
37 iv) to exploit all subsidiary rights in the Contribution, v) the inclusion of electronic links from the  
38 Contribution to third party material where-ever it may be located; and, vi) licence any third party  
39 to do any or all of the above."  
40  
41  
42  
43  
44  
45  
46  
47  
48  
49  
50  
51  
52  
53  
54  
55  
56  
57  
58  
59  
60

## References

- [1] German Medical Association, National Association of Statutory Health Insurance Physicians, Association of the Scientific Medical Societies. Nationale VersorgungsLeitlinie Therapie des Typ-2-Diabetes – Langfassung 2013; Available from <http://www.leitlinien.de/nvl/diabetes/therapie>. Accessed 19 Mar 2018 [Guideline in German].
- [2] Inzucchi SE, Bergenstal RM, Buse JB et al. Management of hyperglycemia in type 2 diabetes, 2015: a patient-centered approach: update to a position statement of the American Diabetes Association and the European Association for the Study of Diabetes. *Diabetes Care* 2015;38:140-49.
- [3] Rutten GEHM, Alzaid A. Person-centred type 2 diabetes care: time for a paradigm shift. *Lancet Diabetes Endocrinol* 2017;Jun 9: doi: 10.1016/S2213-8587(17)30193-6.
- [4] Rodriguez-Gutierrez R, Gionfriddo MR, Ospina NS et al. Shared decision making in endocrinology: present and future directions. *Lancet Diabetes Endocrinol* 2016;4:706-716.
- [5] Joseph-Williams N, Lloyd A, Edwards A et al. Implementing shared decision making in the NHS: lessons from the MAGIC programme. *BMJ* 2017;357:j1744.
- [6] Agoritsas T, Heen AF, Brandt L et al. Decision aids that really promote shared decision making: the pace quickens. *BMJ* 2015;350: g7624.
- [7] Scholte op Reimer WJ, Moons P, De Geest S et al. Cardiovascular risk estimation by professionally active cardiovascular nurses: results from the Basel 2005 Nurses Cohort. *Eur J Cardiovasc Nurs* 2006;5:258-63.
- [8] Mühlhauser I, Kasper J, Meyer G. Understanding of diabetes prevention studies: questionnaire survey of professionals in diabetes care. *Diabetologia* 2006;49:1742-1746.
- [9] Gigerenzer G, Gaissmaier W, Kurz-Milcke E, Schwartz LM, Woloshin S. Helping doctors and patients to make sense of health statistics. *Psychol Sci Public Interest* 2007;8:53-96.
- [10] Montori VM, Kunneman M, Brito JP. Shared decision making and improving health care: the answer is not in. *JAMA* 2017;318: 617-8.
- [11] Stacey D, Legare F, Lewis K et al. Decision aids for people facing health treatment or screening decisions. *Cochrane Database Syst Rev* 2017;4:Cd001431.
- [12] Den Ouden H, Vos RC, Rutten GEHM. Effectiveness of shared goal setting and decision making to achieve treatment targets in type 2 diabetes patients: a cluster-randomized trial (OPTIMAL). *Health Expect* 2017;20:1172-80.
- [13] Mann DM, Ponienman D, Montori VM, Arciniega J, McGinn T. The statin choice decision aid in primary care: a randomized trial. *Patient Educ Couns* 2010;80:138-40.

- 1  
2  
3 [14] Weymiller AJ, Montori VM, Jones LA et al. Helping patients with type 2 diabetes mellitus  
4 make treatment decisions: statin choice randomized trial. *Arch Intern Med* 2007;167:1076-  
5 82.  
6  
7  
8 [15] Perestelo-Perez L, Rivero-Santana A, Boronat M et al. Effect of the statin choice encounter  
9 decision aid in Spanish patients with type 2 diabetes: a randomized trial. *Patient Educ*  
10 *Couns* 2016;99:295-9.  
11  
12 [16] Mullan RJ, Montori VM, Shah ND et al. The diabetes mellitus medication choice decision  
13 aid: a randomized trial. *Arch Intern Med* 2009;169:1560-8.  
14  
15 [17] Karagiannis T, Liakos A, Branda ME et al. Use of the diabetes medication choice decision  
16 aid in patients with type 2 diabetes in Greece: a cluster randomised trial. *BMJ Open*  
17 2016;6:e012185.  
18  
19 [18] Mathers N, Ng CJ, Campbell MJ, Colwell B, Brown I, Bradley A. Clinical effectiveness of a  
20 patient decision aid to improve decision quality and glycaemic control in people with  
21 diabetes making treatment choices: a cluster randomised controlled trial (PANDAs) in  
22 general practice. *BMJ Open* 2012;2:e001469.  
23  
24 [19] Denig P, Schuling J, Haaiker-Ruskamp F, Voorham J. Effects of a patient oriented decision  
25 aid for prioritising treatment goals in diabetes: pragmatic randomised controlled trial. *BMJ*  
26 2014;349:g5651.  
27  
28 [20] Lenz M, Kasper J, Mühlhauser I. Development of a patient decision aid for prevention of  
29 myocardial infarction in type 2 diabetes - rationale, design and pilot testing. *Psychosoc Med*  
30 2009;6:Doc05.  
31  
32 [21] Buhse S, Mühlhauser I, Heller T et al. Informed shared decision-making programme on the  
33 prevention of myocardial infarction in type 2 diabetes: a randomised controlled trial. *BMJ*  
34 *Open* 2015;5:e009116.  
35  
36 [22] Grüsser M, Bott U, Ellermann P, Kronsbein P, Jörgens V. Evaluation of a structured  
37 treatment and teaching program for non-insulin-treated type II diabetic outpatients in  
38 Germany after the nationwide introduction of reimbursement policy for physicians. *Diabetes*  
39 *Care* 1993;16:1268-75.  
40  
41 [23] Kronsbein P, Mühlhauser, Jörgens V, Scholz V, Venhaus A, Berger M. Evaluation of a  
42 structured treatment and teaching programme on non-insulin-dependent diabetes. *Lancet*  
43 1988;2:1407-11.  
44  
45 [24] Grüsser M, Hartmann P, Schlottmann N, Jörgens V. Structured treatment and teaching  
46 programme for type 2 diabetic patients on conventional insulin treatment: evaluation of  
47 reimbursement policy. *Patient Educ Couns* 1996;29:123-30.  
48  
49  
50  
51  
52  
53  
54  
55  
56  
57  
58  
59  
60

- 1  
2  
3 [25] Müller UA, Müller R, Starrach A et al. Should insulin therapy in type 2 diabetic patients be  
4 started on an out- or inpatient basis? Results of a prospective controlled trial using the same  
5 treatment and teaching programme in ambulatory care and a university hospital. *Diabetes*  
6 *Metab* 1998;24:251-55.  
7  
8  
9 [26] Busse R. Disease management programs in Germany's statutory health insurance system.  
10 *Health Aff (Millwood)* 2004;23:56-67.  
11  
12 [27] Buhse S, Mühlhauser I, Kuniss N et al. An informed shared decision making programme on  
13 the prevention of myocardial infarction for patients with type 2 diabetes in primary care:  
14 protocol of a cluster randomised, controlled trial. *BMC Fam Pract* 2015;16:43.  
15  
16 [28] Craig P, Dieppe P, Macintyre S, Michie S, Nazareth I, Petticrew M. Developing and  
17 evaluating complex interventions: the new Medical Research Council guidance. *BMJ*  
18 2008;337:a1655.  
19  
20 [29] Grant A, Treweek S, Dreischulte T, Foy R, Guthrie B. Process evaluations for cluster-  
21 randomised trials of complex interventions: a proposed framework for design and reporting.  
22 *Trials* 2013;14:15.  
23  
24 [30] Pfadenhauer LM, Gerhardus A, Mozygemba K et al. Making sense of complexity in context  
25 and implementation: the Context and Implementation of Complex Interventions (CICI)  
26 framework. *Implement Sci* 2017;12:21.  
27  
28 [31] Pinnock H, Barwick M, Carpenter CR et al. Standards for Reporting Implementation Studies  
29 (StaRI) Statement. *BMJ* 2017;356:i6795.  
30  
31 [32] Busse R, Blumel M, Knieps F, Barnighausen T. Statutory health insurance in Germany: a  
32 health system shaped by 135 years of solidarity, self-governance, and competition. *Lancet*  
33 2017;390:882-97.  
34  
35 [33] Fuchs S, Henschke C, Blumel M, Busse R. Disease management programs for type 2  
36 diabetes in Germany: a systematic literature review evaluating effectiveness. *Dtsch Arztebl*  
37 *Int* 2014;111:453-63.  
38  
39 [34] German Medical Association, National Association of Statutory Health Insurance  
40 Physicians, Association of the Scientific Medical Societies. Nationale VersorgungsLeitlinie  
41 Diabetes – Strukturierte Schulungsprogramme – Langfassung. Available from  
42 <http://www.leitlinien.de/nvl/diabetes/schulungsprogramme> 2012; Accessed 19 Mar 2018  
43 [Guideline in German].  
44  
45 [35] Joseph-Williams N, Elwyn G, Edwards A. Knowledge is not power for patients: a systematic  
46 review and thematic synthesis of patient-reported barriers and facilitators to shared decision  
47 making. *Patient Educ Couns* 2014;94:291-309.  
48  
49  
50  
51  
52  
53  
54  
55  
56  
57  
58  
59  
60

- 1  
2  
3 [36] Légaré F, Adekpedjou R, Stacey D et al. Interventions for increasing the use of shared  
4 decision making by healthcare professionals. *Cochrane Database Syst Rev* 2018;7:  
5 CD006732.  
6  
7  
8 [37] German Medical Association, National Association of Statutory Health Insurance  
9 Physicians, Association of the Scientific Medical Societies. PatientenLeitlinie zur Nationalen  
10 VersorgungsLeitlinie „Therapie des Typ-2-Diabetes“ 2015; Available from  
11 <http://www.leitlinien.de/nvl/diabetes/therapie>. Accessed 19 Mar 2018 [Patient guideline in  
12 German].  
13  
14  
15 [38] Marteau TM, Dormandy E, Michie S. A measure of informed choice. *Health Expect*  
16 2001;4:99-108.  
17  
18 [39] Gärtner FR, Bomhof-Roordink H, Smith IP, Scholl I, Stiggelbout AM, Pieterse AH. The  
19 quality of instruments to assess the process of shared decision making: A systematic  
20 review. *PLoS One* 2018;13:e0191747.  
21  
22 [40] Ballard AY, Kessler M, Scheitel M, Montori VM, Chaudhry R. Exploring differences in the  
23 use of the statin choice decision aid and diabetes medication choice decision aid in primary  
24 care. *BMC Med Inform Decis Mak* 2017;17:118.  
25  
26 [41] Kasper J, Heesen C, Köpke S, Fulcher G, Geiger F. Patients' and observers' perceptions of  
27 involvement differ. Validation study on inter-relating measures for shared decision making.  
28 *PLoS One* 2011;6:e26255.  
29  
30 [42] Mühlhauser I, Sawicki PT, Didjurgeit U, Jörgens V, Trampisch HJ, Berger M. Evaluation of a  
31 structured treatment and teaching programme on hypertension in general practice. *Clin Exp*  
32 *Hypertens* 1993;15:125-42.  
33  
34 [43] Mühlhauser I, Meyer G. Evidence base in guideline generation in diabetes. *Diabetologia*  
35 2013;56:1201-9.  
36  
37  
38  
39  
40  
41  
42  
43  
44  
45  
46  
47  
48  
49  
50  
51  
52  
53  
54  
55  
56  
57  
58  
59  
60

1  
2  
3  
4  
5  
6  
7  
8  
9  
10  
11  
12  
13  
14  
15  
16  
17  
18  
19  
20  
21  
22  
23  
24  
25  
26  
27  
28  
29  
30  
31  
32  
33  
34  
35  
36  
37  
38  
39  
40  
41  
42  
43  
44  
45  
46  
47  
48  
49  
50  
51  
52  
53  
54  
55  
56  
57  
58  
59  
60

**Tables**

For peer review only



**Table 1. Baseline characteristics of patients.**

| Characteristic                                                      | ISDM-P group (n = 151) | Control group (n = 128) |
|---------------------------------------------------------------------|------------------------|-------------------------|
| Women                                                               | 67 (44.4)              | 59 (46.1)               |
| Age, years                                                          | 59.5 (6.5)             | 58.7 (7.9)              |
| Duration of diabetes, years <sup>a</sup>                            | 8.5 (6.5)              | 7.5 (6.2)               |
| Systolic blood pressure, mmHg <sup>b</sup>                          | 140 (15.1)             | 140 (16.0)              |
| Diastolic blood pressure, mmHg <sup>b</sup>                         | 81 (8.9)               | 84 (8.5)                |
| Body mass index, kg/m <sup>2c</sup>                                 | 33.6 (5.3)             | 31.5 (6.7)              |
| HbA1c, % <sup>d</sup>                                               | 7.0 (0.7)              | 7.0 (1.0)               |
| Total cholesterol <sup>b</sup> , mmol/l                             | 5.2 (1.1)              | 5.3 (1.1)               |
| HDL cholesterol <sup>e</sup> , mmol/l                               | 1.3 (0.4)              | 1.3 (0.4)               |
| LDL cholesterol <sup>e</sup> , mmol/l                               | 3.2 (0.9)              | 3.4 (1.0)               |
| Smoker (%) <sup>f</sup>                                             | 29 (19.2)              | 18 (14.5)               |
| Diagnosis hypertension (%) <sup>b</sup>                             | 134 (88.7)             | 115 (90.6)              |
| Medication for blood pressure control (%)                           | 129 (85.4)             | 104 (81.3)              |
| Medication for glucose control                                      | 124 (82.1)             | 95 (74.2)               |
| Insulin                                                             | 36 (23.8)              | 28 (21.9)               |
| Metformin                                                           | 111 (73.5)             | 88 (68.8)               |
| Sulfonylurea                                                        | 21 (13.9)              | 10 (7.8)                |
| Other antidiabetic agents                                           | 52 (34.4)              | 40 (31.3)               |
| Statin medication                                                   | 50 (33.1)              | 41 (32.0)               |
| Participation in teaching session for hypertension <sup>g</sup> (%) | 28 (21.1)              | 11 (10.1)               |
| Graduation                                                          |                        |                         |
| None                                                                | 1 (0.7)                | 1 (0.8)                 |
| Junior high school                                                  | 29 (19.2)              | 24 (18.8)               |
| High school                                                         | 93 (61.6)              | 86 (67.2)               |
| Qualification for technical college or university                   | 28 (18.5)              | 17 (13.3)               |

Values are given as patient number (percentage) or as means (SD); ISDM-P = Informed Shared Decision Making Programme;

<sup>a</sup>ISDM-P n = 151, control group n = 125; <sup>b</sup>ISDM-P n = 151, control group n = 127; <sup>c</sup>ISDM-P n = 150,

control group n = 126; <sup>d</sup>ISDM-P n = 151, control group n = 128; <sup>e</sup>ISDM-P n = 150, control group n = 117;

<sup>f</sup>ISDM-P n = 151, control group n = 124; <sup>g</sup>Patients with diagnosis of hypertension, ISDM-P n = 133, control group n = 109

**Table 2: Primary endpoint: Adherence to antihypertensive or statin therapy**

|                        | ISDM-P group  | Control group | adjusted OR [95% CI]; P value | MI: adjusted OR [95% CI]; p value | ICC   |
|------------------------|---------------|---------------|-------------------------------|-----------------------------------|-------|
| Antihypertensive drugs | 96/118 (81.4) | 71/90 (78.9)  | 1.2 [0.5 to 2.6]; 0.696       | 1.1 [0.5 to 2.4]; 0.812           | 0.176 |
| Statins                | 51/58 (87.9)  | 43/45 (95.6)  | 0.4 [0.1 to 2.0]; 0.271       | 0.4 [0.1 to 1.4]; 0.139           | 0.000 |

Values are given as patient number (percentage); ISDM-P = Informed Shared Decision Making Programme; OR=odds ratio; MI=multiple imputation (N=279); ICC = intracluster coefficient

For peer review only

**Table 3: Informed choice and adequate knowledge**

|                                 | <b>ISDM-P group</b> | <b>Control group</b> | <b>Adjusted OR [95% CI]; P value</b> | <b>MI: adjusted OR [95% CI]; p value</b> |
|---------------------------------|---------------------|----------------------|--------------------------------------|------------------------------------------|
| Adequate knowledge <sup>a</sup> | 61/136 (44.9)       | 3/109 (2.8)          | 29.3 [6.9 to 124.6];<br><0.001       | 21.4 [6.8 to 67.4];<br><0.001            |
| Informed choice: statins        | 43/128 (33.6)       | 3/105 (2.9)          | 16.6 [4.4 to 63.0];<br><0.001        | 6.2 [2.4 to 16.0];<br><0.001             |
| Informed choice: blood pressure | 50/129 (38.8)       | 3/109 (2.8)          | 22.2 [5.3 to 93.3];<br><0.001        | 10.0 [3.3 to 30.4];<br><0.001            |
| Informed choice: HbA1c          | 57/134 (42.5)       | 3/109 (2.8)          | 26.0 [6.5 to 104.8];<br><0.001       | 11.5 [4.0 to 33.1];<br><0.001            |
| Informed choice: smoking        | 3/23 (13.0)         | 0/16 (0)             | 5.1 [0.2 to 135.1];<br>0.322         | -                                        |

Values are given as patient number (percentage); ISDM-P = Informed Shared Decision Making Programme; OR=odds ratio; MI = multiple imputation (n = 279)

<sup>a</sup>at least eight out of eleven questions were correctly answered

**Table 4: Match of treatment goals between physicians and patients**

| Treatment goal              | ISDM-P group     | Control group    | Adjusted difference [95% CI]; P value | MI: adjusted difference [95% CI]; p value |
|-----------------------------|------------------|------------------|---------------------------------------|-------------------------------------------|
| Blood pressure <sup>a</sup> | 3.06 mmHg (5.21) | 6.89 mmHg (6.94) | -4.0 mmHg [-6.6 to -1.4]; 0.005       | -3.1 [-5.6 to -0.5]; 0.019                |
| HbA1c <sup>b</sup>          | 0.26% (0.33)     | 0.49% (0.49)     | -0.2 [-0.4 to -0.1]; 0.003            | -0.2 [-0.39 to -0.05]; 0.012              |
|                             |                  |                  | Adjusted OR [95% CI]; P value         | MI: adjusted OR [95% CI]; P value         |
| Statins                     | 114/127 (89.8)   | 81/104 (77.9)    | 2.4 [0.9 to 6.2]; 0.077               | 1.9 [0.7 to 4.8]; 0.181                   |
| Stop smoking                | 9/17 (52.9)      | 6/9 (66.7)       | 0.5 [0.1 to 4.0]; 0.537               | 0.6 [0.1 to 3.6]; 0.561                   |
| Prioritized goal            | 92/104 (88.5)    | 45/79 (57.0)     | 6.5 [3.0 to 14.4]; <0.001             | 2.6 [1.3 to 5.2]; 0.009                   |

Values are given as patient number (percentage) unless stated otherwise. ISDM-P = Informed Shared Decision Making Programme; HbA1c = glycated haemoglobin; MI = multiple imputation (n = 279); OR=odds ratio

<sup>a</sup>adjusted mean difference between patients' treatment goals and physicians' treatment goals; values are means (standard deviation); ISDM-P n = 127, control group n = 95

<sup>b</sup>adjusted mean difference between patients' treatment goals and physicians' treatment goals; values are means (standard deviation); ISDM-P n = 133, control group n = 95

1  
2  
3 **Figure. Study flow-chart.**

4 ISDM-P = Informed Shared Decision Making Programme; GP = general practitioner; T1 = directly after  
5 counselling or usual care; T2 = 6-month follow-up  
6  
7  
8  
9  
10  
11  
12  
13  
14  
15  
16  
17  
18  
19  
20  
21  
22  
23  
24  
25  
26  
27  
28  
29  
30  
31  
32  
33  
34  
35  
36  
37  
38  
39  
40  
41  
42  
43  
44  
45  
46  
47  
48  
49  
50  
51  
52  
53  
54  
55  
56  
57  
58  
59  
60

For peer review only

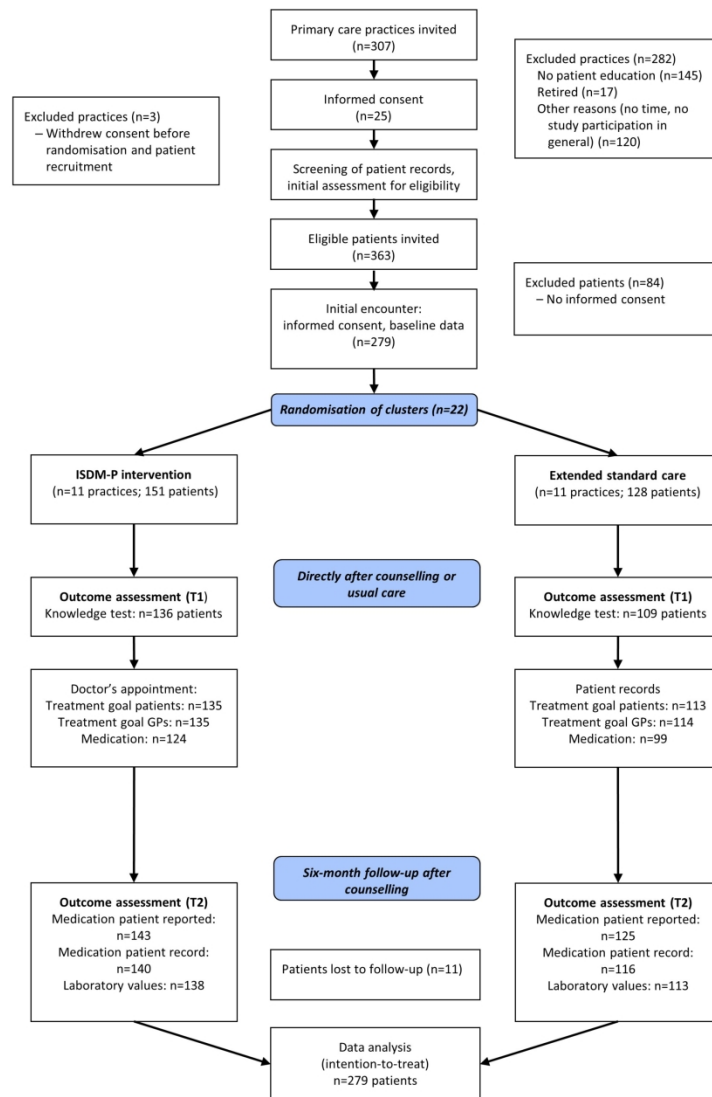

Figure. Study flow-chart.

ISDM-P = Informed Shared Decision Making Programme; GP = general practitioner; T1 = directly after counselling or usual care; T2 = 6-month follow-up

275x397mm (300 x 300 DPI)

**Data supplement**

For peer review only

1  
2  
3  
4  
5  
6  
7  
8  
9  
10  
11  
12  
13  
14  
15  
16  
17  
18  
19  
20  
21  
22  
23  
24  
25  
26  
27  
28  
29  
30  
31  
32  
33  
34  
35  
36  
37  
38  
39  
40  
41  
42  
43  
44  
45  
46  
47  
48  
49  
50  
51  
52  
53  
54  
55  
56  
57  
58  
59  
60

## S1 Study procedure and registration

Practices were either allocated to the ISDM-P or to standard intervention (control). A research associate of the Jena University Hospital (NK) explained documentation forms and gave instructions to the control group. The intervention groups were trained for the ISDM-P by a research fellow (SB) and a psychologist (KL) of the University of Hamburg.

Patients received diabetes information material from their practices: an evidence-based patient decision aid for the ISDM-P group, and an extract of the German National Disease Management Guideline for the control group.

For ISDM-P patients, an appointment for the group teaching was made within 2 to 4 weeks after receiving the decision aid. Some practices provided a teaching session in the evening for patients with a full-time job or who were often away for work. When an appointment failed, a new one was made. At the end of the teaching session, patients documented their preferences on treatment goals regarding statin uptake, smoking cessation, systolic blood pressure level and HbA1c values on the documentation sheet. In addition, they were asked to document their personally most important treatment goal. Within one week after the teaching session, patients had a consultation with their GP to discuss their preferences, using the documentation sheet. As a result, the GP documented the goals they agreed on in the same documentation sheet (in a column next to the column where the patient had already documented his or her goals). In case of any deviation from the patient's goals, reasons were documented on the same sheet. Patients kept the original sheet; one copy was stored in the patient record at the practice, and another copy in the study folder.

At six months follow-up, the primary endpoint was assessed.

The study was approved by the ethics committee of the Medical Association of Thuringia in April 2014. In December 2014, the first family practice was enrolled in the study, and the first patient was enrolled in December 2014. The study was submitted to registration in February 2015 (ISRCTN77300204). The detailed study protocol was published in March 2015 [1]. In order to avoid time constraints, recruitment of practices was started earlier. This had no influence on study results, as practices were randomised after registration and publication of



1  
2  
3 the study protocol. Randomisation of the first 12 clusters was performed in June 2015.

4  
5 Therefore, all practices and patients were randomised after study registration and well after  
6  
7 publication of the study protocol.  
8  
9

### 10 11 *Deviations from the protocol*

12  
13 In our study protocol, adequate knowledge was defined as a score above the median. For  
14  
15 the cluster RCT, however, the cut-off that was predefined for the proof-of-concept RCT (e.g.,  
16  
17 having at least 8 correctly answered questions, out of 11) was used. We additionally  
18  
19 calculated adequate knowledge according to the protocol. Results were consistent with the  
20  
21 cut-off used in the RCT; significantly more ISDM-P patients had adequate risk knowledge  
22  
23 than those in the control group (71% versus 8%;  $p < 0.001$ ).  
24  
25

26 It was planned to use Fisher's exact test to compare the groups in case of binary outcomes.

27  
28 However, this univariate comparison does not account for cluster effects in the trial.

29  
30 Therefore, generalised mixed models were fitted, with intervention as a fixed effect, and  
31  
32 practices as a random effect. For the same reason, linear mixed models were used rather  
33  
34 than unpaired  $t$ -tests, which had been planned in the study protocol.  
35

36  
37 The title of this publication slightly differs from the title of the protocol ("An informed shared  
38  
39 decision making programme on the prevention of myocardial infarction for patients with type  
40  
41 2 diabetes in primary care: protocol of a cluster randomised, controlled trial"). Our  
42  
43 intervention is about more than just prevention of myocardial infarction. It also includes  
44  
45 information about other diabetes related complications. Therefore, the current and correct  
46  
47 title is "An informed shared decision making programme for patients with type 2 diabetes in  
48  
49 primary care: cluster randomised controlled trial".  
50  
51  
52  
53  
54  
55  
56  
57  
58  
59  
60

**S2 Intervention characteristics**

| <b>Components</b>                 | <b>ISDM-P</b>                                                                                                                                                                                                         | <b>Control intervention</b>                                                                                                                       |
|-----------------------------------|-----------------------------------------------------------------------------------------------------------------------------------------------------------------------------------------------------------------------|---------------------------------------------------------------------------------------------------------------------------------------------------|
| <b>Training for the providers</b> | Participants: 4 to 6 GPs, plus the MA(s) employed in the participating practices                                                                                                                                      | Not offered                                                                                                                                       |
|                                   | Duration: approx. six hours                                                                                                                                                                                           |                                                                                                                                                   |
|                                   | Elements: curriculum for teaching sessions, concept of SDM for GPs and MAs together; Didactic lectures and role playing for GPs and MAs separately                                                                    |                                                                                                                                                   |
| <b>Information for patients</b>   | Topic: DA on the prevention of myocardial infarction in type 2 diabetes [2]                                                                                                                                           | Topic: Brief extract of the German National Disease Management Guideline on the treatment of patients with type 2 diabetes, patients' version [3] |
|                                   | Date of delivery: 2 to 4 weeks before teaching session                                                                                                                                                                | Date of delivery: 2 to 4 weeks before practice visit                                                                                              |
|                                   | Core elements: Evidence-based patient information on heart attack risk, risk factors and different preventive options; combinations of 100 stick-figure pictograms and bar graphs; and user guide for risk estimation | Core elements: Recommendations related to treatment targets and a link to the full version of the guideline [3]                                   |
| <b>Patient teaching module</b>    | Participants: 4 to 6 patients per group                                                                                                                                                                               | Not offered                                                                                                                                       |
|                                   | Duration: 90 minutes                                                                                                                                                                                                  |                                                                                                                                                   |
|                                   | Core elements: DA on the prevention of myocardial infarction and diabetes related complications [2], corresponding curriculum and media, provided by trained MAs                                                      |                                                                                                                                                   |

|                                 |                                                                                                                                                       |                                               |
|---------------------------------|-------------------------------------------------------------------------------------------------------------------------------------------------------|-----------------------------------------------|
| <b>Consultation<br/>with GP</b> | Duration: approx. 10 minutes                                                                                                                          | Optional standard consultation with physician |
|                                 | Core elements: patient-held sheet for the documentation of individual treatment goals;<br>ISDM-P consultation guideline to structure the conversation |                                               |

Adapted from the study protocol [1]

ISDM-P = Informed Shared Decision Making Programme; GPs = general practitioners; MA = medical assistant; SDM = shared decision making; DA = decision aid

### S3 patient-held sheet for documentation of treatment goals.

Date: \_\_\_ / \_\_\_ / \_\_\_

## My treatment goals

|                                                                         |                                    | Please fill in after the teaching session 😊 | Treatment agreement<br>Completed by GP during encounter |
|-------------------------------------------------------------------------|------------------------------------|---------------------------------------------|---------------------------------------------------------|
| Statins                                                                 | Uptake                             | <input type="checkbox"/>                    | <input type="checkbox"/>                                |
|                                                                         | No statins                         | <input type="checkbox"/>                    | <input type="checkbox"/>                                |
| Smoking                                                                 | Quit smoking                       | <input type="checkbox"/>                    | <input type="checkbox"/>                                |
|                                                                         | Continue smoking                   | <input type="checkbox"/>                    | <input type="checkbox"/>                                |
|                                                                         | Non-smoker                         | <input type="checkbox"/>                    |                                                         |
| Blood glucose                                                           | HbA1c-level _____ %                |                                             | _____ %                                                 |
| Blood pressure                                                          | Systolic blood pressure _____ mmHg |                                             | _____ mmHg                                              |
| <b>What option is most important to you?</b><br>(Please check one only) |                                    |                                             |                                                         |
| •                                                                       | Statin intake                      | <input type="checkbox"/>                    | <input type="checkbox"/>                                |
| •                                                                       | Smoking cessation                  | <input type="checkbox"/>                    | <input type="checkbox"/>                                |
| •                                                                       | Achievement of HbA1c goal          | <input type="checkbox"/>                    | <input type="checkbox"/>                                |
| •                                                                       | Achievement of blood pressure goal | <input type="checkbox"/>                    | <input type="checkbox"/>                                |
| Comment if goals deviate from patient's goals (completed by GP)         |                                    |                                             |                                                         |

1  
2  
3  
4  
5  
6  
7  
8  
9  
10  
11  
12  
13  
14

#### S4 Risk knowledge and realistic expectations after intervention.

| Outcome                                        | ISDM-P group (n = 136) | Control group (n = 109) | adjusted difference [95% CI]; P value | MI: adjusted difference [95% CI]; p value | ICC   |
|------------------------------------------------|------------------------|-------------------------|---------------------------------------|-------------------------------------------|-------|
| Risk knowledge (primary endpoint) (score 0–11) | 6.96 (2.55)            | 2.86 (1.87)             | 4.06 [2.96 to 5.17]; <0.001           | 3.7 [2.7 to 4.8]; <0.001                  | 0.208 |
| Realistic expectations (score 0–5)             | 3.09 (1.45)            | 0.92 (1.01)             | 2.18 [1.67 to 2.69]; <0.001           | 2.0 [1.5 to 2.5]; <0.001                  | 0.108 |

15 Values are given as means (standard deviation); CI = confidence interval; ICC = intracluster coefficient; ISDM-P =  
16 Informed Shared Decision Making Programme; MI = multiple imputation (n = 279)

17  
18  
19  
20  
21  
22  
23  
24  
25  
26  
27  
28  
29  
30  
31  
32  
33  
34  
35  
36  
37  
38  
39  
40  
41  
42  
43  
44  
45  
46  
47  
48  
49  
50  
51  
52  
53  
54  
55  
56  
57  
58  
59  
60

For peer review only

**S5 Patients' estimation of individual heart attack risk after intervention**

| Heart attack risk  | ISDM-P group  | Control group | Adjusted OR [95% CI]; <i>p</i> value |
|--------------------|---------------|---------------|--------------------------------------|
| Correct estimation | 87/131 (66.4) | 13/96 (13.5)  | 12.69 [5.47 to 29.39]; <0.001        |
| Overestimation     | 26/131 (19.8) | 79/96 (82.3)  | 0.05 [0.03 to 0.11]; <0.001          |
| Underestimation    | 18/131 (13.7) | 10/96 (4.2)   | 2.79 [1.01 to 7.74]; <0.001          |

Values are given as patient number (percentage); CI = confidence interval; ISDM-P = Informed Shared Decision Making Programme; OR = odds ratio

For peer review only

**S6 Calculated risk and patients' estimated risk of myocardial infarction**

|                                          | <b>ISDM-P group</b> | <b>Control group</b> |
|------------------------------------------|---------------------|----------------------|
| Calculated risk of myocardial infarction | 11.9% (4.2)         | 11.5% (4.6)          |
| Patients' estimated risk                 | 14.5% (11.8)        | 41.6% (26.2)         |

Values are given as mean (standard deviation); ISDM-P = Informed Shared Decision Making Programme

For peer review only

1 **S7 Achievement of treatment goals at 6 months of follow-up.**

2

3

4

5

6

7

8

9

10

11

12

| Outcome                     | ISDM-P            | Control intervention | Adjusted OR [95% CI]; <i>p</i> value | MI: adjusted OR [95% CI]; <i>p</i> value |
|-----------------------------|-------------------|----------------------|--------------------------------------|------------------------------------------|
| Statins                     | 109/127<br>(85.8) | 87/100<br>(87.0)     | 0.9 [0.3 to 2.7];<br>0.899           | 0.95 [0.4 to 2.5];<br>0.921              |
| Blood pressure <sup>a</sup> | 119/127<br>(93.7) | 99/110<br>(90)       | 1.6 [0.5 to 5.3];<br>0.476           | 0.8 [0.3 to 2.2];<br>0.683               |
| HbA1c <sup>a</sup>          | 126/133<br>(94.7) | 98/110<br>(89.1)     | 2.1 [0.7 to 6.6];<br>0.201           | 1.2 [0.4 to 3.6];<br>0.792               |
| Smoking                     | 8/22 (36.4)       | 4/13 (30.8)          | 1.4 [0.3 to 6.8];<br>0.688           | 1.4 [0.2 to 8.1];<br>0.736               |

13 Values are given as patient number (percentage); CI = confidence interval; ISDM-P = Informed Shared Decision Making Programme; HbA1c = glycated hemoglobin; MI = multiple imputation (n = 279); OR = odds ratio

14 <sup>a</sup>Achievement was defined as having reached a value between 80% and 120% of the defined goal

15

16

17

18

19

20

21

22

23

24

25

26

27

28

29

30

31

32

33

34

35

36

37

38

39

40

41

42

43

44

45

46

47

48

49

50

51

52

53

54

55

56

57

58

59

60



### S8 Patients' prioritised treatment goals

| Prioritised goal       | ISDM-P n = 135 | Control n = 113 | Adjusted OR [95% CI]; p value |
|------------------------|----------------|-----------------|-------------------------------|
| Blood pressure control | 38 (28.1)      | 14 (12.4)       | 3.0 [1.2 to 7.3]; 0.015       |
| Glucose control        | 59 (43.7)      | 54 (47.8)       | 0.8 [0.4 to 1.7]; 0.529       |
| Statins                | 6 (4.4)        | 9 (8.0)         | 0.5 [0.1 to 2.1]; 0.336       |
| Stop smoking           | 9 (6.7)        | 4 (3.5)         | 1.5 [0.5 to 4.4]; 0.451       |
| No prioritisation      | 23 (17.0)      | 32 (28.3)       | 0.5 [0.2 to 1.3]; 0.150       |

Values are given as patient number (percentage); CI = confidence interval; ISDM-P = Informed Shared Decision Making Programme; OR = odds ratio

For peer review only

## S9 Process evaluation

The implementation success of the ISDM-P may depend on the complex interactions between components and terms and conditions of the setting. Based on the framework by Grant et al. [4], underlying processes involving clusters and patients were monitored to explore barriers and to promote factors in implementing the ISDM-P.

### 1. Processes involving clusters (primary care practices)

Baseline characteristics of clusters (practices)

|                                                                  | <b>ISDM</b> | <b>Control</b> |
|------------------------------------------------------------------|-------------|----------------|
| <b>Primary care practices</b>                                    | n = 11      | n = 11         |
| Mean number of general practitioners (GPs) in each practice (SD) | 1.9 (0.9)   | 1.9 (1.2)      |
| Mean number of medical assistants (MAs) in each practice (SD)    | 3.4 (1.5)   | 2.9 (1.5)      |
| <b>MAs</b>                                                       | n = 12      | n = 12         |
| Mean age, years (SD)                                             | 42.1 (8.8)  | 40.3 (10.8)    |
| Female sex                                                       | 12          | 10             |
| Weekly working time, hours (SD)                                  | 33.2 (8.9)  | 33.3 (12.0)    |
| Years of professional experience, mean (SD)                      | 15.8 (9.2)  | 13.8 (9.0)     |
| <b>Physicians</b>                                                | n = 12      | n = 12         |
| Mean age (SD)                                                    | 42.9 (5.9)  | 50.2 (6.5)     |
| Female sex                                                       | 7           | 8              |

| <b>Recruitment of clusters</b>                  |                                                                                                                                                                                                                                                                                                                                                                                                                                                                                                                                                                                                                                                                                                                                                                                                                                                                                                                                                              |
|-------------------------------------------------|--------------------------------------------------------------------------------------------------------------------------------------------------------------------------------------------------------------------------------------------------------------------------------------------------------------------------------------------------------------------------------------------------------------------------------------------------------------------------------------------------------------------------------------------------------------------------------------------------------------------------------------------------------------------------------------------------------------------------------------------------------------------------------------------------------------------------------------------------------------------------------------------------------------------------------------------------------------|
| Recruitment of practices                        | <p><u>Facilitators:</u> Most practices that agreed to participate in our study had previously attended a special training course at the Jena University Hospital in order to provide the DMP structured treatment and teaching programme for patients with type 2 diabetes, which is covered by health insurances.</p> <p><u>Barriers:</u> Only 22 of 307 practices that were invited gave informed consent. The main reason for not participating was that healthcare teams did not offer DMP patient teaching modules, even though this has been defined as an essential part of diabetes care. Patients are usually sent to specialised diabetes practices that provide patient teaching. The ISDM-P addresses the entire practice team. As treatment goals to be negotiated and defined in the teaching sessions are further discussed in the consultation with the GP, outsourcing the teaching module might not work in this disconnected concept.</p> |
| <b>Delivery to clusters (practice teams)</b>    |                                                                                                                                                                                                                                                                                                                                                                                                                                                                                                                                                                                                                                                                                                                                                                                                                                                                                                                                                              |
| Intervention, intervention delivery as intended | <p><u>Facilitators:</u> Training for providers and the corresponding material were pre-tested and optimised with GPs and diabetes educators of the Jena University Hospital, Germany. All ISDM-P trainings (n = 6) were performed by the same research fellow (SB) and a psychologist (KL). The training sessions took place at the Jena University Hospital following a structured curriculum and protocol. All trainings were conducted according to the curriculum and protocol. Role playing was used to train ISDM skills and to ensure that the team was well prepared for the teaching session and the consultation. MAs are familiar with role playing</p>                                                                                                                                                                                                                                                                                           |

1  
2  
3  
4  
5  
6  
7  
8  
9  
10  
11  
12  
13  
14  
15  
16  
17  
18  
19  
20  
21  
22  
23  
24  
25  
26  
27  
28  
29  
30  
31  
32  
33  
34  
35  
36  
37  
38  
39  
40  
41  
42  
43  
44  
45  
46

|                                    |                                                                                                                                                                                                                                                                                                                                                                                                                                                                                                                                                                                                                                                                                                                                                                                                                                            |
|------------------------------------|--------------------------------------------------------------------------------------------------------------------------------------------------------------------------------------------------------------------------------------------------------------------------------------------------------------------------------------------------------------------------------------------------------------------------------------------------------------------------------------------------------------------------------------------------------------------------------------------------------------------------------------------------------------------------------------------------------------------------------------------------------------------------------------------------------------------------------------------|
|                                    | <p>from former trainings for the DMP structured teaching programme. The role play took less time than expected. Therefore, duration of the training was reduced from six hours to four or five hours. A reason for that was a small group size in all trainings. Participants appreciated time saving.</p> <p><u>Barriers:</u> It was difficult to arrange a mutual training appointment for some practices because the time to recruit all patients for the study varied between the practices. Hence, three practice teams were trained individually. In two instances, two or four practice teams were trained together.</p> <p>One team (of one GP and one MA) was trained at the practice site. The GP and MA declined role playing. It was therefore impossible to check if they were adequately prepared to provide the ISDM-P.</p> |
| <b>Response of clusters</b>        |                                                                                                                                                                                                                                                                                                                                                                                                                                                                                                                                                                                                                                                                                                                                                                                                                                            |
| <p>Knowledge and comprehension</p> | <p><u>Facilitators:</u> Role playing and question cards</p> <p>During training, problems were discussed within the groups. At the end of the training, MAs answered the question cards that were also used in the patient teaching session. Incorrect answers were corrected and explained. MAs stated that they felt well prepared for the ISDM-P teaching module.</p> <p>We did not directly assess MAs' and GPs' knowledge of the probabilities of benefits and harms of preventive options regarding diabetes-related complications after the training. However, ISDM-P patients' high level of knowledge and realistic expectations indicated that MAs had sufficient skills to provide risk</p>                                                                                                                                      |

1  
2  
3  
4  
5  
6  
7  
8  
9  
10  
11  
12  
13  
14  
15  
16  
17  
18  
19  
20  
21  
22  
23  
24  
25  
26  
27  
28  
29  
30  
31  
32  
33  
34  
35  
36  
37  
38  
39  
40  
41  
42  
43  
44  
45  
46

|  |                                                                                                                                                                                                                                                                                                                                                                  |
|--|------------------------------------------------------------------------------------------------------------------------------------------------------------------------------------------------------------------------------------------------------------------------------------------------------------------------------------------------------------------|
|  | <p>information to patients in an understandable manner.</p> <p><u>Barriers:</u> The MA who declined role playing mentioned some trouble with explaining benefits of statin intake during one patient teaching session. She felt that patients were not motivated anymore to follow the teaching session. We did not directly assess MAs' and GPs' knowledge.</p> |
|--|------------------------------------------------------------------------------------------------------------------------------------------------------------------------------------------------------------------------------------------------------------------------------------------------------------------------------------------------------------------|

**2. Processes involving patients with type 2 diabetes**

| <b>Recruitment and reach in individuals</b> |                                                                                                                                                                                                                                                                                                                                                                                                                                                                                                                                                                                                                                                                                                                                  |
|---------------------------------------------|----------------------------------------------------------------------------------------------------------------------------------------------------------------------------------------------------------------------------------------------------------------------------------------------------------------------------------------------------------------------------------------------------------------------------------------------------------------------------------------------------------------------------------------------------------------------------------------------------------------------------------------------------------------------------------------------------------------------------------|
| Recruitment procedure                       | <p><u>Facilitators:</u> A research associate explained and handed over a guide to GPs and MAs on how to recruit patients and collect baseline data. Supported by the research associate, MAs or GPs of each practice screened the patient records for eligibility. All patients who met inclusion criteria were informed about the study by a letter from their GP and were invited to participate during the next consultation.</p> <p>In order to minimize selection bias, practices were randomised to either ISDM-P or standard care only after recruitment and assessment of baseline data.</p> <p><u>Barriers:</u> 84 patients did not want to participate in the study. Reasons were too much effort and no interest.</p> |
| <b>Delivery to patients</b>                 |                                                                                                                                                                                                                                                                                                                                                                                                                                                                                                                                                                                                                                                                                                                                  |
| Fidelity of the ISDM-P teaching             | A total of 35 teaching sessions were provided by ISDM-P practices. MAs conducted 2 to 6 sessions that                                                                                                                                                                                                                                                                                                                                                                                                                                                                                                                                                                                                                            |

|                                                                                                                                                                                                                                                                                                                                                                                                                                                                                 |                                                                                                                                                                                                                                                                                                                                                                                                                                                                                                                                                                                                                                                                                                                                                                                                                                                                                                                                                                                                                                                                                                                                                                                                                                                                                                                                                                                                                                                                                                                                                                                                                                                                                  |
|---------------------------------------------------------------------------------------------------------------------------------------------------------------------------------------------------------------------------------------------------------------------------------------------------------------------------------------------------------------------------------------------------------------------------------------------------------------------------------|----------------------------------------------------------------------------------------------------------------------------------------------------------------------------------------------------------------------------------------------------------------------------------------------------------------------------------------------------------------------------------------------------------------------------------------------------------------------------------------------------------------------------------------------------------------------------------------------------------------------------------------------------------------------------------------------------------------------------------------------------------------------------------------------------------------------------------------------------------------------------------------------------------------------------------------------------------------------------------------------------------------------------------------------------------------------------------------------------------------------------------------------------------------------------------------------------------------------------------------------------------------------------------------------------------------------------------------------------------------------------------------------------------------------------------------------------------------------------------------------------------------------------------------------------------------------------------------------------------------------------------------------------------------------------------|
| <p>1<br/>2<br/>3 sessions provided by MAs<br/>4<br/>5<br/>6 (assessed using diary entries of<br/>7<br/>8 each teaching session and<br/>9<br/>10 interviews with MAs after all<br/>11<br/>12 teaching sessions were<br/>13<br/>14 completed)<br/>15<br/>16<br/>17<br/>18<br/>19<br/>20<br/>21<br/>22<br/>23<br/>24<br/>25<br/>26<br/>27<br/>28<br/>29<br/>30<br/>31<br/>32<br/>33<br/>34<br/>35<br/>36<br/>37<br/>38<br/>39<br/>40<br/>41<br/>42<br/>43<br/>44<br/>45<br/>46</p> | <p>lasted between 50 and 120 minutes. The group size varied from one patient to seven patients.</p> <p><u>Facilitators:</u> Teaching curriculum and documentation sheet for treatment goals</p> <p>MAs followed the teaching curriculum and used the corresponding material. They used the curriculum to prepare for the patient teaching and to structure the session. One of the materials was a magnet board with 100 orange and blue game pieces, representing people with or without myocardial infarction, to visualize patients' risks of myocardial infarction and the benefit of statin intake. It reminded participants of a game board, and a few MAs were worried that patients may feel that they were not being taken seriously by using the board. Only a few patients did not want to use the board. Overall, it was positively accepted by participants. MAs stated that the board was helpful to explain statistics, and they wish to keep using it.</p> <p>A total of 135 of 136 patients who participated in the ISDM teaching session defined individual treatment goals together with their MAs and subsequently discussed them with their physicians. The patient-held sheet to document individual treatment goals was the link between the teaching session and the consultation with the GP.</p> <p><u>Barriers:</u> A few MAs indicated that there was <i>"too much statistics"</i> to explain to patients. They were afraid to overstrain their patients. Fifteen patients did not attend the teaching session because of time constraints due to work-related issues or for other personal reasons. Not all patients had read the decision aid.</p> |
|---------------------------------------------------------------------------------------------------------------------------------------------------------------------------------------------------------------------------------------------------------------------------------------------------------------------------------------------------------------------------------------------------------------------------------------------------------------------------------|----------------------------------------------------------------------------------------------------------------------------------------------------------------------------------------------------------------------------------------------------------------------------------------------------------------------------------------------------------------------------------------------------------------------------------------------------------------------------------------------------------------------------------------------------------------------------------------------------------------------------------------------------------------------------------------------------------------------------------------------------------------------------------------------------------------------------------------------------------------------------------------------------------------------------------------------------------------------------------------------------------------------------------------------------------------------------------------------------------------------------------------------------------------------------------------------------------------------------------------------------------------------------------------------------------------------------------------------------------------------------------------------------------------------------------------------------------------------------------------------------------------------------------------------------------------------------------------------------------------------------------------------------------------------------------|

|                                                                                                                                                                              |                                                                                                                                                                                                                                                                                                                                                                                                                                                                                                                                                                                                                                                                                                                                                                                                                                                                                                                                                                                                                                                                                                                                       |
|------------------------------------------------------------------------------------------------------------------------------------------------------------------------------|---------------------------------------------------------------------------------------------------------------------------------------------------------------------------------------------------------------------------------------------------------------------------------------------------------------------------------------------------------------------------------------------------------------------------------------------------------------------------------------------------------------------------------------------------------------------------------------------------------------------------------------------------------------------------------------------------------------------------------------------------------------------------------------------------------------------------------------------------------------------------------------------------------------------------------------------------------------------------------------------------------------------------------------------------------------------------------------------------------------------------------------|
|                                                                                                                                                                              | The teaching sessions were not video-recorded.                                                                                                                                                                                                                                                                                                                                                                                                                                                                                                                                                                                                                                                                                                                                                                                                                                                                                                                                                                                                                                                                                        |
| <p>Fidelity of the ISDM-P consultations between patients and GPs (assessed using protocol entries of GP's consultations and interviews with GPs at the end of the study)</p> | <p>Patients consulted their GPs directly after the teaching session or within one to three weeks afterwards. A total of 95 ISDM-P consultations were protocolled (151 patients were randomised to ISDM-P). The consultations lasted between 5 and 20 minutes (mean 11.4 minutes).</p> <p><u>Facilitators:</u> Consultation guideline and documentation sheet for treatment goals</p> <p>GPs stated that they used the ISDM-P consultation guideline to structure the conversation with the patients, and they considered the guideline to be helpful and time-saving. The patient-held sheet for the documentation of individual treatment goals was used to discuss the patients' personal treatment goals and to find a consensus. GPs said that they actively involved patients in the decision making process, and that patients knew their treatment goals. One GP said that former consultations were more "<i>instructive, demanding, and in some ways authoritarian</i>", while patients and professional teams now "<i>meet on an equal footing</i>".</p> <p><u>Barriers:</u> We did not video record the consultations.</p> |
| <b>Response of patients regarding the ISDM-P</b>                                                                                                                             |                                                                                                                                                                                                                                                                                                                                                                                                                                                                                                                                                                                                                                                                                                                                                                                                                                                                                                                                                                                                                                                                                                                                       |
| Satisfaction with the ISDM-P, knowledge level, participation in                                                                                                              | <p><u>Facilitators:</u> MAs said that patients appreciated the opportunity to participate in the decision making process and to define their own treatment goals. GPs stated that the patients were well prepared for</p>                                                                                                                                                                                                                                                                                                                                                                                                                                                                                                                                                                                                                                                                                                                                                                                                                                                                                                             |

1  
2  
3  
4  
5  
6  
7  
8  
9  
10  
11  
12  
13  
14  
15  
16  
17  
18  
19  
20  
21  
22  
23  
24  
25  
26  
27  
28  
29  
30  
31  
32  
33  
34  
35  
36  
37  
38  
39  
40  
41  
42  
43  
44  
45  
46

|                 |                                                                                                                                                                                                                                                                                                                                                                                                                                                                                                                                                                                                                                                                                                                                                                                                                                                                                                                  |
|-----------------|------------------------------------------------------------------------------------------------------------------------------------------------------------------------------------------------------------------------------------------------------------------------------------------------------------------------------------------------------------------------------------------------------------------------------------------------------------------------------------------------------------------------------------------------------------------------------------------------------------------------------------------------------------------------------------------------------------------------------------------------------------------------------------------------------------------------------------------------------------------------------------------------------------------|
| decision making | <p>decision making by their MAs, which was “better than expected” and “better than usual”. GPs mentioned differences in communication before and after the ISDM-P teaching module. During the consultations, the patients asked more questions than usual, and these were distinct and more specific than normal; e.g., they asked for risk factors as well as for benefits and harms of treatment options. One GP said that patients were more well-informed, making the consultation much easier than before. Quantitative data showed that ISDM-P patients had better knowledge and realistic expectations regarding heart attack risk and preventive options, and that they made more informed choices. Matching of prioritised treatment goals between patients and physicians was better in the ISDM-P group.</p> <p><u>Barriers:</u> A few patients gave feedback that there was too much statistics.</p> |
|-----------------|------------------------------------------------------------------------------------------------------------------------------------------------------------------------------------------------------------------------------------------------------------------------------------------------------------------------------------------------------------------------------------------------------------------------------------------------------------------------------------------------------------------------------------------------------------------------------------------------------------------------------------------------------------------------------------------------------------------------------------------------------------------------------------------------------------------------------------------------------------------------------------------------------------------|

**3. Other**

| <b>Maintenance</b>                               |                                                                                                                                                                                                                                                                                                                                                                                             |
|--------------------------------------------------|---------------------------------------------------------------------------------------------------------------------------------------------------------------------------------------------------------------------------------------------------------------------------------------------------------------------------------------------------------------------------------------------|
| Integrating the ISDM-P in routine care, workload | <p><u>Facilitators:</u> Appropriate workload</p> <p>MAs described the efforts of training and practicing for the teaching module as similar as for DMP patient education modules. The overall workload was perceived as appropriate. Most GPs described the workload as appropriate. They considered the intended distribution of work within the team as helpful and reduced workload.</p> |



|                                                                                         |                                                                                                                                                                  |
|-----------------------------------------------------------------------------------------|------------------------------------------------------------------------------------------------------------------------------------------------------------------|
|                                                                                         | <p><u>Barriers:</u> Budgetary allowance</p> <p>Most GPs stated that they will provide the ISDM-P in routine care if it will be covered by health insurances.</p> |
| <b>Unintended consequences</b>                                                          |                                                                                                                                                                  |
| <p>MAs: stress, anxiety, tension</p> <p>within the team due to</p> <p>overburdening</p> | <p>One MA did not like to work with the magnet board.</p> <p>No other unintended consequences were mentioned in the interviews.</p>                              |
| <p>GPs: stress, anxiety, tension</p> <p>within the team due to</p> <p>overburdening</p> | <p>No unintended consequences were mentioned in the interviews.</p>                                                                                              |

## References

- [1] Buhse S, Mühlhauser I, Kuniss N, Müller UA, Lehmann T, Liethmann K et al. An informed shared decision making programme on the prevention of myocardial infarction for patients with type 2 diabetes in primary care: protocol of a cluster randomised, controlled trial. *BMC Fam Pract* 2015;16:43.
- [2] Lenz M, Kasper J, Mühlhauser I. Development of a patient decision aid for prevention of myocardial infarction in type 2 diabetes - rationale, design and pilot testing. *Psychosoc Med* 2009;6:Doc05.
- [3] German Medical Association, National Association of Statutory Health Insurance Physicians, Association of the Scientific Medical Societies. PatientenLeitlinie zur Nationalen VersorgungsLeitlinie „Therapie des Typ-2-Diabetes“ 2015; Available from <http://www.leitlinien.de/nvl/diabetes/therapie>. Accessed 19 Mar 2018 [Patient guideline in German].
- [4] Grant A, Treweek S, Dreischulte T, Foy R, Guthrie B. Process evaluations for cluster-randomised trials of complex interventions: a proposed framework for design and reporting. *Trials* 2013;14:15.

**CONSORT 2010 checklist of information to include when reporting a cluster randomised trial**

| Section/Topic                    | Item No | Standard Checklist item                                                                                                 | Extension for cluster designs                                                                 | Page No *                 |
|----------------------------------|---------|-------------------------------------------------------------------------------------------------------------------------|-----------------------------------------------------------------------------------------------|---------------------------|
| <b>Title and abstract</b>        |         |                                                                                                                         |                                                                                               |                           |
|                                  | 1a      | Identification as a randomised trial in the title                                                                       | Identification as a cluster randomised trial in the title                                     | 1                         |
|                                  | 1b      | Structured summary of trial design, methods, results, and conclusions (for specific guidance see CONSORT for abstracts) | See table 2                                                                                   | 3-4                       |
| <b>Introduction</b>              |         |                                                                                                                         |                                                                                               |                           |
| <b>Background and objectives</b> | 2a      | Scientific background and explanation of rationale                                                                      | Rationale for using a cluster design                                                          | 6-7                       |
|                                  | 2b      | Specific objectives or hypotheses                                                                                       | Whether objectives pertain to the the cluster level, the individual participant level or both | 7, 10, study protocol [1] |
| <b>Methods</b>                   |         |                                                                                                                         |                                                                                               |                           |
| <b>Trial design</b>              | 3a      | Description of trial design (such as parallel, factorial) including allocation ratio                                    | Definition of cluster and description of how the design features apply to the clusters        | 7, study protocol [1]     |
|                                  | 3b      | Important changes to methods after trial commencement (such as eligibility criteria), with reasons                      |                                                                                               | 12, data supplement S1    |
| <b>Participants</b>              | 4a      | Eligibility criteria for participants                                                                                   | Eligibility criteria for clusters                                                             | 7-8, study protocol [1]   |
|                                  | 4b      | Settings and locations where the data were collected                                                                    |                                                                                               | 7-8, study protocol [1]   |

|                               |    |                                                                                                                                       |                                                                                                                                                                                                                    |                                            |
|-------------------------------|----|---------------------------------------------------------------------------------------------------------------------------------------|--------------------------------------------------------------------------------------------------------------------------------------------------------------------------------------------------------------------|--------------------------------------------|
| <b>Interventions</b>          | 5  | The interventions for each group with sufficient details to allow replication, including how and when they were actually administered | Whether interventions pertain to the cluster level, the individual participant level or both                                                                                                                       | 9, data supplement S2, study protocol [1]  |
| <b>Outcomes</b>               | 6a | Completely defined pre-specified primary and secondary outcome measures, including how and when they were assessed                    | Whether outcome measures pertain to the cluster level, the individual participant level or both                                                                                                                    | 10, study protocol [1], data supplement S3 |
|                               | 6b | Any changes to trial outcomes after the trial commenced, with reasons                                                                 |                                                                                                                                                                                                                    | Data supplement S1                         |
| <b>Sample size</b>            | 7a | How sample size was determined                                                                                                        | Method of calculation, number of clusters(s) (and whether equal or unequal cluster sizes are assumed), cluster size, a coefficient of intracluster correlation (ICC or $k$ ), and an indication of its uncertainty | 10-11, study protocol [1]                  |
|                               | 7b | When applicable, explanation of any interim analyses and stopping guidelines                                                          |                                                                                                                                                                                                                    | n.a.                                       |
| <b>Randomisation:</b>         |    |                                                                                                                                       |                                                                                                                                                                                                                    |                                            |
| <b>Sequence generation</b>    | 8a | Method used to generate the random allocation sequence                                                                                |                                                                                                                                                                                                                    | 11, study protocol [1]                     |
|                               | 8b | Type of randomisation; details of any restriction (such as blocking and block size)                                                   | Details of stratification or matching if used                                                                                                                                                                      | 11, study protocol [1]                     |
| <b>Allocation concealment</b> | 9  | Mechanism used to implement the random allocation sequence (such                                                                      | Specification that allocation was based on clusters rather than individuals and whether                                                                                                                            | 11, study protocol [1]                     |

|                       |                                                                                                                            |                                                                                                                                                                     |                         |
|-----------------------|----------------------------------------------------------------------------------------------------------------------------|---------------------------------------------------------------------------------------------------------------------------------------------------------------------|-------------------------|
| <b>mechanism</b>      | as sequentially numbered containers), describing any steps taken to conceal the sequence until interventions were assigned | allocation concealment (if any) was at the cluster level, the individual participant level or both                                                                  |                         |
| <b>Implementation</b> | 10 Who generated the random allocation sequence, who enrolled participants, and who assigned participants to interventions | Replace by 10a, 10b and 10c                                                                                                                                         |                         |
|                       | 10a                                                                                                                        | Who generated the random allocation sequence, who enrolled clusters, and who assigned clusters to interventions                                                     | 8-9, data supplement S1 |
|                       | 10b                                                                                                                        | Mechanism by which individual participants were included in clusters for the purposes of the trial (such as complete enumeration, random sampling)                  | 8-9, data supplement S1 |
|                       | 10c                                                                                                                        | From whom consent was sought (representatives of the cluster, or individual cluster members, or both), and whether consent was sought before or after randomisation | 7                       |
|                       |                                                                                                                            |                                                                                                                                                                     |                         |
| <b>Blinding</b>       | 11a If done, who was blinded after assignment to interventions (for example, participants, care providers, those           |                                                                                                                                                                     | 10-11                   |

|                                                             |     |                                                                                                                                                |                                                                                                                                             |                                           |
|-------------------------------------------------------------|-----|------------------------------------------------------------------------------------------------------------------------------------------------|---------------------------------------------------------------------------------------------------------------------------------------------|-------------------------------------------|
|                                                             |     | assessing outcomes) and how                                                                                                                    |                                                                                                                                             |                                           |
|                                                             | 11b | If relevant, description of the similarity of interventions                                                                                    |                                                                                                                                             | 9, data supplement S2, study protocol [1] |
| <b>Statistical methods</b>                                  | 12a | Statistical methods used to compare groups for primary and secondary outcomes                                                                  | How clustering was taken into account                                                                                                       | 11-12, study protocol [1]                 |
|                                                             | 12b | Methods for additional analyses, such as subgroup analyses and adjusted analyses                                                               |                                                                                                                                             | 11-12, study protocol [1]                 |
| <b>Results</b>                                              |     |                                                                                                                                                |                                                                                                                                             |                                           |
| <b>Participant flow (a diagram is strongly recommended)</b> | 13a | For each group, the numbers of participants who were randomly assigned, received intended treatment, and were analysed for the primary outcome | For each group, the numbers of clusters that were randomly assigned, received intended treatment, and were analysed for the primary outcome | 12, Fig 1                                 |
|                                                             | 13b | For each group, losses and exclusions after randomisation, together with reasons                                                               | For each group, losses and exclusions for both clusters and individual cluster members                                                      | 12, Fig 1                                 |
| <b>Recruitment</b>                                          | 14a | Dates defining the periods of recruitment and follow-up                                                                                        |                                                                                                                                             | 8-9, data supplement S1                   |
|                                                             | 14b | Why the trial ended or was stopped                                                                                                             |                                                                                                                                             | n.a.                                      |
| <b>Baseline data</b>                                        | 15  | A table showing baseline demographic and clinical characteristics for each group                                                               | Baseline characteristics for the individual and cluster levels as applicable for each group                                                 | Table 1, data supplement S9               |

|                                |     |                                                                                                                                                   |                                                                                                                                            |                                          |
|--------------------------------|-----|---------------------------------------------------------------------------------------------------------------------------------------------------|--------------------------------------------------------------------------------------------------------------------------------------------|------------------------------------------|
| <b>Numbers analysed</b>        | 16  | For each group, number of participants (denominator) included in each analysis and whether the analysis was by original assigned groups           | For each group, number of clusters included in each analysis                                                                               | Tables 2-4, data supplement S4-S8        |
| <b>Outcomes and estimation</b> | 17a | For each primary and secondary outcome, results for each group, and the estimated effect size and its precision (such as 95% confidence interval) | Results at the individual or cluster level as applicable and a coefficient of intracluster correlation (ICC or k) for each primary outcome | 12-13, Tables 2-4, data supplement S4-S8 |
|                                | 17b | For binary outcomes, presentation of both absolute and relative effect sizes is recommended                                                       |                                                                                                                                            | 12-13, Tables 2-4, data supplement S4-S8 |
| <b>Ancillary analyses</b>      | 18  | Results of any other analyses performed, including subgroup analyses and adjusted analyses, distinguishing pre-specified from exploratory         |                                                                                                                                            | 12-13                                    |
| <b>Harms</b>                   | 19  | All important harms or unintended effects in each group (for specific guidance see CONSORT for harms)                                             |                                                                                                                                            | 14-15, data supplement S9                |
| <b>Discussion</b>              |     |                                                                                                                                                   |                                                                                                                                            |                                          |
| <b>Limitations</b>             | 20  | Trial limitations, addressing sources of potential bias, imprecision, and, if relevant, multiplicity of analyses                                  |                                                                                                                                            | 15-16                                    |

|                          |    |                                                                                                               |                                                                           |                       |
|--------------------------|----|---------------------------------------------------------------------------------------------------------------|---------------------------------------------------------------------------|-----------------------|
| <b>Generalisability</b>  | 21 | Generalisability (external validity, applicability) of the trial findings                                     | Generalisability to clusters and/or individual participants (as relevant) | 15, 17-18             |
| <b>Interpretation</b>    | 22 | Interpretation consistent with results, balancing benefits and harms, and considering other relevant evidence |                                                                           | 15-16, 18             |
| <b>Other information</b> |    |                                                                                                               |                                                                           |                       |
| <b>Registration</b>      | 23 | Registration number and name of trial registry                                                                |                                                                           | 4                     |
| <b>Protocol</b>          | 24 | Where the full trial protocol can be accessed, if available                                                   |                                                                           | 7, study protocol [1] |
| <b>Funding</b>           | 25 | Sources of funding and other support (such as supply of drugs), role of funders                               |                                                                           | 20                    |

\* Note: page numbers optional depending on journal requirements

[1] Buhse S, Mühlhauser I, Kuniss N et al. An informed shared decision making programme on the prevention of myocardial infarction for patients with type 2 diabetes in primary care: protocol of a cluster randomised, controlled trial. BMC Fam Pract 2015;16:43.
